# Supplementary material for: The awareness of novelty for strangely familiar words: a laboratory analogue of the déjà vu experience
Source: PeerJ. 2014 Nov 11;2:e666. doi: 10.7717/peerj.666 (PMC4230551; doi:10.7717/peerj.666)
Supplement: Supplemental Information 2 — Legend for raw_data.xlsx file. Sheets are listed in bold. Column headings are numbered with titles in italics. SHEET—pp data and discursive ≪ participant demographics and questionnaire data 1. pp#—participant number in order tested (numeric) 2. age–age in years at time of testing (numeric) 3. gender—self-reported gender at time of testing (F = female, M = male) 4. prev_dv—self-reported previous experience of deja vu (yes, no) 5. freq_dv—self-reported frequency of previous deja vu experience (N/A = not applicable, a = less than once a year, b = one to four times a year, c = greater than four times a year) 6. prev_disc—transcribed account of previous deja vu from pre-experimental questionnaire (N/A = not applicable, text) 7. exp_disc—transcribed account of experimental deja vu from post-experimental questionnaire (N/A = not applicable, text) SHEET—raw categorical data ≪ test phase data 1. pp#— participant number in order tested (numeric) 2. block#—block number (numeric: 1–4) 3. word—word presented at test (string) 4. list#—list number (numeric: 1–6) 5. list_cond—list condition (categorical: N = high novelty lists, n = low novelty lists, F = high familiarity lists, f = low familiarity lists) 6. sec_task—character string monitored at study (string: 1–3 characters) 7. word_cond—word condition (categorical: old_x = target followed by study presentation word number, new_unrel = unrelated lure, new_rel = related lure, new_crit = critical lure) 8. sec_task_count—number of words reported at study as beginning with the sec_task character string (numeric: 0–5) 9. oldnew_resp—old or new response (categorical: resp_new = “new”, resp_old = “old”) 10. oldnew_acc—accuracy of oldnew_resp (categorical: 0 = inaccurate, 1 = accurate) 11. RT_oldnew—oldnew_resp reaction time from start of oldnew question for that trial (numeric) 12. RT_oldnew_cum—oldnew_resp reaction time from start of testlist1 (numeric) 13. conf_resp—confidence response (categorical: 1 = low, 2 = medium, 3 = high) 14. R [file peerj-02-666-s002.xlsx]

## Sheet: pp data and discursive
pp#	age	gender	prev_dv	freq_dv	prev_disc	exp_disc
1	21	F	no	N/A	N/A	According to the definition I think I experienced déjà vu, and it made me doubt and question the reliability of my memory. The duration of déjà vu experience were relatively short and the emotional intensity low, but it created a feeling of unease or strangeness.
2	22	F	yes	> 4	I cannot remember a specific occasion. Typically a scenario or situation I am in just seem familiar, or if I have dreamt about it before. Sometimes it is triggered by something someone says. Normally it is not at tall emotional, lasts for perhaps five minutes. The déjà vu experiences never really made me question the reliability of my memory. Since they do not feel like memories but are just fami…	I experienced some not very strong déjà vu when I was not sure if the word presented or one similar to it might have been shown. I experienced the feeling of trying to remember the presentation stage, though probably only for a couple of seconds. The experiences did slightly make me question my memory. They were not at all emotionally intense.
3	24	M	yes	1 - 4 times a year	Generally the emotional intensity is limited, it tends to be scenes of events that feel familiar such as groups of people, seating arrangements or discussions. Occasionally places I have never seen before feel familiar as well. Or conversations feel as though they have been repeated. The duration tends to be instantaneous, as though a still image was taken from a video I was watching. I does not …	During the experiment, words that I knew did not appear felt familiar as I associated them with the words I saw. I remain confident in my memory due to the evidence of how many times I reported seeing a letter. Although, I now have come to doubt it. I seem to recall discrepancies between what I recorded and what I was told I recorded. This does not fit into my original definition, but does fit th…
4	28	F	yes	< 1 a year	The déjà vu experience of mine all lasted very short time. Such as I felt I have been to a place or met someone before, but actually I never did that. I usually ignore these memories and I believe my memories.	I still believe my memory. I think maybe the word has something to do with the word in the list. For example they all belong to traffic transport. So I feel I have read it before. But my brain tells me it did not appear before.
5	27	F	no	N/A	N/A	N/A
6	23	M	yes	<1 a year	Experiences are usually short and involve a conversation or quick act which somebody performs. Experiences would last a couple of seconds. The experience would make me think that my memory was good in terms of reliability. In addition it would also make me think that my brain maybe processing a typical step of sequences in regard to behavior.	Emotional Intensity, I questioned myself as I knew I had not seen it because I recorded a zero. Duration, a couple of seconds. Reliability of my memory was questioned as it was invoked after just seeing a string of words.
7	21	M	yes	1 - 4 times a year	Typically, someone will say something to me, or I to them, and I will get a strong feeling this thing has been said before in a similar context or between the same interlocutors. The feeling itself is normally a short sharp shock, but the sense can linger. Déjà vu makes me remember my memory is not perfect but relies on triggers which can be falsely fired. I assume, I am not a psychologist.	N/A
8	23	F	yes	1 - 4 times a year	Sometimes I will enter a room a be convinced that I have been therefore even if I never have. It feels very disorienting and I spend a few minutes doubting my memory or trying to figure out if I actually have been in this room before.	The lists were associated with words that the additional task prompted me to think of but that word was rarely in the list. When tested and shown the word I had been prompted to think of my initial reaction was to say it was old even though my screen told me it was new.
9	21	F	no	N/A	N/A	There were a few words that sparked something in my mind that I had seen them before, ie. they felt familiar, but my memory was telling me that I had not seen them before. The déjà vu experience was not that strong and definitely was not emotional plus it did not last long. The experience just made me doubt my judgment slightly.
10	22	F	yes	> 4 times a year	A typical déjà vu experience normally makes me really doubt the reliability of my memory since normally is really hard for me to tell whether I have had a similar experience before since they feel just as intense as other experience. They normally are quire short experiences, about twenty minutes. For example I frequently have déjà vu experience where I met with friends and It feels that the exac…	I knew that some of the words did not show up but were just primed by the other words in the list but I could picture me seeing them on the screen in the same way I could remember seeing the others ones, but I knew I had not actually. These experiences are only brief and it makes me question the reliability of my memory since it shows how easy it is to influence memory.
11	23	M	yes	1 - 4 times a year	Rarely, something very minor might happen and I suddenly realize that I feel I have been in the exact same situation before. To my knowledge, I in fact have not been in one, even though it feels like it. It usually is a very fast experience maybe only one or two seconds long. These experiences if indeed déjà vu, are not negative, in my view. I am usually in a state of awe, but a positive one. Apo…	I am unsure whether it was exactly déjà vu but in some cases I saw words usually words I was expecting to see in the groups but did not, and it felt as if I had seen them. After a split second I would realize they were not in the groups. In all honesty, I felt a bit pissed off with myself, as if I had fallen victim to an expected prank.
12	22	F	yes	1 - 4 times a year	Entering into a room with someone whilst having a conversation with them. I will briefly feel like we have been in that same place before having the same conversation. It only lasts for a few seconds but can last longer, it the fades and I recall experiencing déjà vu but not why or how it felt. It has made me question my memory as I wonder if I am not having the same conversations over and over a…	N/A
13	22	F	yes	1 - 4 times a year	My most recent déjà vu experience happened when I was walking and walking to someone I had met recently on my left, going by some stone buildings. I had the distinct feeling that this exact moment, looking over at the person I was talking to on my left and seeing the stones go by as we walked, had happened before. I even felt I remembered it happening about a year ago though I know it is not logi…	Sometimes, I had a very slight feeling that I had seen a particular word before, sometimes this made me uncertain as to whether I actually had or not, so I am not sure if this counts as déjà vu. Sometimes I was pretty sure it had not been part of the list, but did experience a feeling of familiarity with the shape of the letters together despite that wondering whether or not I had seen something …
14	27	F	no	N/A	N/A	Not strong. Five seconds. Not reliable.
15	51	F	no	N/A	N/A	I think that the theme of each list was a factor in my déjà vu experiences. For example in the list concerning the theme web I found myself thinking about spiders (I hate them!) The duration of each déjà vu experience generally only lasted a second or two but I did feel that each experience made me think longer and harder about whether I had actually seen the specific word before.
16	19	M	yes	> 4 times a year	A typical déjà vu of mine is associated with feeling of danger and approaching disaster. I have a deep belief for a moment, in spite of not being Religious, let alone a neuroscience student, that I remember being in the very same environment, and the situation was doomed to be followed by a terrible event shortly after. My déjà vu can have a very long-term effect, with panic lasting for minutes a…	N/A
17	18	M	yes	> 4 times a year	My typical experience is not emotionally intense. It usually simply involves me realising that I have been in that particular situation before (with regard to the appearance of the room, smell of the room, my thoughts at the moment etc.). It usually does not last very long, just the sudden realisation and myself thinking about it for several minutes. It usually makes me doubt my memory, especiall…	As a whole, I felt that there were no strong déjà vu experiences during the experiment. However, by the definition that was given, several episodes were encountered, albeit not strongly, where I was unsure whether the word had been presented before. The durations were not very distinct (i.e. not sudden realisation of déjà vu) but not long at all. The experiences made me doubt my memory, but more …
18	21	F	yes	< 1 a year	Suddenly seeing a book or poster or visual cue and feeling as though I know everything about it even if I have not seen or read it. Slightly disorientating in its intensity for a max of ten seconds. The experience does not make me feel as if my memory is more or less reliable I would simply classify the moment as other due to their infrequency. Always triggered by visual cues and never by audial …	N/A
19	21	F	yes	< 1 a year	Working in an ice cream shop, this happens a few times. It is not really very emotional but it really distracts me from what I am currently doing at the time. I think I have a fairly reliable memory and déjà vu does not really make me feel differently about that, even though it may not be accurate.	N/A
20	21	M	yes	> 4 times a year	A Typical déjà vu experience lasts for a couple of seconds and is accompanied by an emotion of puzzlement or recognition depending on the matters at hand. I does not in anyway draw into question the reliability of my memory.	I came with the word freedom, it was a fleeting sensation that lasted about a second. It was not at all emotionally intense.
21	26	F	yes	1 - 4 times a year	I usually get déjà vu for random events. I remember the places, people, smells and surroundings for about one to two minutes. I always assume I had a dream about this before a couple of month ago. My déjà vu experiences do not usually involve any emotional components I do not really question the reliability of my memory because déjà vu does not occur to often for me and it involves random everyda…	N/A
22	26	F	yes	> 4 times a year	It is emotionally intense to the extent that I often stop what I am doing. It is a sharp realisation and it takes me until I have understood the reason for it to finish the déjà vu experience. I feel both positively and negatively about my memory as a result: positive equals because I am pleased to have the feeling of remembering and minus equals because I obviously cannot place the memory proper…	N/A
23	22	M	yes	1 - 4 times a year	A typical déjà vu experience for me would be something like walking from a specific bar to Tesco to buy a specific one item, then getting to Tesco and thinking, ‘wait, did not I do exactly this two days ago?’. I would not consider this to be very emotionally intense, and it usually only lasts maybe about ten seconds. Déjà vu often does make me question whether I did in fact, just do the same thin…	N/A
24	21	F	yes	> 4 times a year	I was at friend’s house having tea when I had déjà vu last week. The strange thing was that I had ever been in his house before that day nor had I ever had tea with him before. It was not particularly emotional, just a little strange. A typical déjà vu experience for me lasts a couple of minutes. It makes me nervous about how reliable my memory actually is.	What would often happen during the experiment is that I would be given the information at the beginning i.e. ‘count the number of words that begin with ‘s’. Then at some point when I was being given the words I would be able to identify a pattern or theme. With regards to ‘s’ batch there were words like ‘fluff’ and ‘hard’. I would then be thinking that the word soft would come up but often the wo…
25	21	F	yes	1 - 4 times a year	Sometimes I will feel that I have done exactly the same thing at the same place before, but I cannot remember when that happened but just feel really familiar. It can last from a few minutes to a day. It makes me feel that my memory is probably not correct about it but it might be connected with the sub-consciousness, for example from dreams.	The feeling of déjà vu experience is quite strong but I only felt it when certain words came up, when it moved on to the next word and (the feeling disappeared) that I am highly confident of. My memory is still quite reliable as I am very certain that some words appeared, but I got confused with other words, especially those similar to the words that appeared in the learning.
26	21	F	yes	1 - 4 times a year	I have felt like I have had the same conversation with someone even though it is the first time I have met them. It is usually only a sentence or phrase that I feel like I have, heard before. It makes me wonder whether I have in fact had the same conversation with another person or whether I may have dreamed it, makes me question my memory.	Words were shown in the test phase which it seemed like I had seen in the study phase but based on the number of times a word beginning with those letters were reported, I had not seen. I think it was because the words I had seen were connotation of the word I thought I had seen. I felt like my memory was reliable I knew I had not seen the words before even though I felt like I had.
27	20	F	yes	1 - 4 times a year	It takes a few moments after a certain situation when I realize the situation was stunningly familiar. It is a strong feeling. The first time in my life when I had it I was frightened but later I felt more of an amazement of how mysterious my mind is. Déjà vu does not make me concerned in any way about the reliability of my memory, I accept déjà vu as a normal experience that happens to everybody…	The emotion associated with déjà vu was weak and was mixed with a feeling of uncertainty of whether the word was new or old. The duration was longer than previously experienced déjà vu but also fainter. I made up my mind whether the word was new or old after a while and I felt confident about my decision. Déjà vu did not affect the way I feel about my memory.
28	26	M	yes	1 - 4 times a year	My experience of déjà vu has changed somewhat, and over the last few years I have started having “layered or repeat” déjà vu in which I feel like I have experienced the same set-up, place, or happening not just once before, but several times. This is quite intense, and I get distracted because I am trying to focus on all the details, whether that book was there last time or of the words someone i…	N/A
29	40	M	no	N/A	N/A	N/A
30	24	F	yes	1 - 4 times a year	Usually my déjà vu are not connected with any emotion, that is I have a feeling of having experienced that certain scene before in my life, but these are usually scenes of everyday life, not connected with any strong emotion (neither positive nor negative). I usually do not think about the reliability of my memory, because I think that it is not me who controls the déjà vu, so I do not think that…	No emotional intensity. One second. I did not think about it. PS. I am not really sure I had the two déjà vu I reported, or if I think I had them only because it was the task of the experiment and I was voluntarily paying attention to the face of experiencing déjà vu.

## Sheet: raw categorical data
pp#	block#	word	list#	list_cond	sec_task	word_cond	sec_task_count	oldnew_resp	oldnew_acc	RT_oldnew	RT_oldnew_cum	conf_resp	RT_conf	RT_conf_cum	dv_intensity	dv_count
1	1	butter	1	f/N	BR	old_9	0	resp_new	0	16.8188	22.419	1	1.54626	24.0543	0	0
1	1	sandwich	1	f/N	BR	old_1	0	resp_old	1	5.45716	30.1054	2	2.87777	33.0766	0	0
1	1	model	1	f/N	BR	new_unrel	0	resp_new	1	3.9323	37.5842	2	3.28847	40.95	0	0
1	1	judge	1	f/N	BR	new_unrel	0	resp_old	0	13.2872	54.8156	1	1.21981	56.1182	0	0
1	1	crust	1	f/N	BR	new_rel	0	resp_old	0	20.9858	77.6821	1	2.17602	79.9476	1	1
1	1	slice	1	f/N	BR	old_3	0	resp_old	1	2.93094	83.4564	3	2.9421	86.4783	0	0
1	1	bread	1	f/N	BR	new_crit	0	resp_old	0	3.5111	90.5717	2	0.920309	91.5767	0	0
1	1	rye	1	f/N	BR	new_rel	0	resp_new	1	12.594	104.749	1	2.27507	107.101	0	0
1	1	creepy	2	f/n	WE	old_3	1	resp_old	1	4.09136	119.818	1	6.05987	125.968	0	0
1	1	poison	2	f/n	WE	new_rel	1	resp_new	1	2.03992	128.597	2	1.02332	129.707	0	0
1	1	organ	2	f/n	WE	new_unrel	1	resp_new	1	2.9541	133.235	2	1.59471	134.915	0	0
1	1	arachnid	2	f/n	WE	old_11	1	resp_old	1	1.75863	137.262	3	1.51287	138.857	0	0
1	1	insect	2	f/n	WE	new_rel	1	resp_new	1	3.34304	142.785	1	0.703403	143.57	0	0
1	1	spider	2	f/n	WE	new_crit	1	resp_new	1	14.1656	158.316	1	2.62908	161.035	1	1
1	1	bridge	2	f/n	WE	new_unrel	1	resp_new	1	6.85143	168.467	1	0.703829	169.255	0	0
1	1	tarantula	2	f/n	WE	old_1	1	resp_new	0	1.86537	171.7	3	1.42428	173.214	0	0
1	1	cushion	3	F/n	TA	old_1	1	resp_new	0	2.09295	180.289	2	1.15604	181.536	0	0
1	1	bench	3	F/n	TA	new_rel	1	resp_new	1	2.18033	184.301	2	3.95022	188.339	0	0
1	1	helmet	3	F/n	TA	new_unrel	1	resp_new	1	1.62402	190.551	2	1.16672	191.806	0	0
1	1	rocking	3	F/n	TA	old_7	1	resp_new	0	3.28205	195.662	1	1.28387	197.031	0	0
1	1	table	3	F/n	TA	old_5	1	resp_old	1	7.73236	205.349	1	1.3838	206.82	0	0
1	1	sitting	3	F/n	TA	new_rel	1	resp_new	1	8.38104	215.786	1	1.41869	217.285	0	0
1	1	chair	3	F/n	TA	new_crit	1	resp_new	1	8.04097	225.906	1	0.739202	226.723	0	0
1	1	poem	3	F/n	TA	new_unrel	1	resp_new	1	1.16641	228.477	2	0.791787	229.358	0	0
1	1	pocket	4	f/N	SHI	old_6	0	resp_new	0	2.30322	236.591	2	5.09289	241.764	0	0
1	1	piano	4	f/N	SHI	new_unrel	0	resp_new	1	1.16708	243.517	2	3.09837	246.704	0	0
1	1	sleeves	4	f/N	SHI	old_7	0	resp_old	1	1.94572	249.233	1	10.549	259.862	0	0
1	1	voltage	4	f/N	SHI	new_unrel	0	resp_new	1	4.19639	264.639	1	2.69635	267.42	0	0
1	1	pants	4	f/N	SHI	old_1	0	resp_new	0	2.6494	270.655	1	1.30739	272.052	0	0
1	1	shirt	4	f/N	SHI	new_crit	0	resp_new	1	6.96806	279.597	1	3.52614	283.203	1	1
1	1	iron	4	f/N	SHI	new_rel	0	resp_new	1	5.35707	289.144	2	1.57217	290.795	0	0
1	1	collar	4	f/N	SHI	new_rel	0	resp_new	1	5.40386	296.782	1	1.41244	298.284	0	0
1	1	good	5	F/n	HON	old_1	1	resp_new	0	5.32208	309.628	1	6.4677	316.181	1	1
1	1	tooth	5	F/n	HON	old_9	1	resp_old	1	2.75526	319.518	1	3.39375	322.996	0	0
1	1	candy	5	F/n	HON	new_rel	1	resp_new	1	3.61654	327.199	1	1.48259	328.761	0	0
1	1	city	5	F/n	HON	new_unrel	1	resp_new	1	1.40707	330.755	2	1.16682	332.013	0	0
1	1	alligator	5	F/n	HON	new_unrel	1	resp_new	1	2.00497	334.606	2	1.47369	336.158	0	0
1	1	sweet	5	F/n	HON	new_crit	1	resp_old	0	6.82145	343.56	1	1.1195	344.765	0	0
1	1	cake	5	F/n	HON	old_5	1	resp_old	1	1.65919	347.002	2	1.06502	348.149	0	0
1	1	tart	5	F/n	HON	new_rel	1	resp_new	1	1.4713	350.196	2	0.974703	351.255	0	0
1	1	junk	6	F/N	T	old_5	0	resp_new	0	26.8061	383.45	1	0.968438	384.495	1	1
1	1	scraps	6	F/N	T	new_rel	0	resp_old	0	1.69963	386.782	1	1.65842	388.524	0	0
1	1	dump	6	F/N	T	old_1	0	resp_new	0	9.35336	398.459	1	0.962695	399.501	0	0
1	1	pony	6	F/N	T	new_unrel	0	resp_new	1	3.83365	403.913	1	0.680706	404.669	0	0
1	1	scholar	6	F/N	T	new_unrel	0	resp_new	1	1.94598	407.19	2	0.821416	408.092	0	0
1	1	trash	6	F/N	T	new_crit	0	resp_new	1	8.95565	417.624	1	3.42813	421.129	1	1
1	1	garbage	6	F/N	T	old_11	0	resp_new	0	3.39347	425.104	1	2.36832	427.561	0	0
1	1	can	6	F/N	T	new_rel	0	resp_new	1	2.9249	431.071	1	0.527465	431.684	0	0
1	2	hand	1	f/N	FO	old_1	0	resp_old	1	5.39542	10.1615	1	1.12526	11.3706	0	0
1	2	sock	1	f/N	FO	new_rel	0	resp_new	1	2.3331	14.2764	1	2.3096	16.6644	0	0
1	2	inch	1	f/N	FO	old_11	0	resp_old	1	1.54235	18.7795	3	1.35976	20.2235	0	0
1	2	walk	1	f/N	FO	old_4	0	resp_new	0	10.3614	31.1657	1	0.389154	31.6384	0	0
1	2	south	1	f/N	FO	new_unrel	0	resp_new	1	1.82258	34.0421	2	0.820832	34.9524	0	0
1	2	movie	1	f/N	FO	new_unrel	0	resp_new	1	1.40135	36.9313	1	0.668374	37.6823	0	0
1	2	ankle	1	f/N	FO	new_rel	0	resp_new	1	3.09604	41.3656	1	0.639657	42.0912	0	0
1	2	foot	1	f/N	FO	new_crit	0	resp_new	1	7.5248	50.1892	2	9.64266	59.9124	1	1
1	2	tamer	2	f/N	L	old_12	0	resp_old	1	1.61814	65.9143	3	2.47916	68.4733	0	0
1	2	feline	2	f/N	L	old_6	0	resp_old	1	1.48353	70.5313	3	0.668906	71.2862	0	0
1	2	number	2	f/N	L	new_unrel	0	resp_new	1	3.51646	75.3894	1	1.583	77.0518	0	0
1	2	cousin	2	f/N	L	new_unrel	0	resp_new	1	1.73484	79.3725	1	0.733308	80.1831	0	0
1	2	roar	2	f/N	L	old_1	0	resp_old	1	2.91333	83.6759	2	0.569273	84.3283	0	0
1	2	lion	2	f/N	L	new_crit	0	resp_new	1	4.67081	89.5713	2	3.66193	93.314	1	1
1	2	bears	2	f/N	L	new_rel	0	resp_new	1	3.04189	96.9319	1	3.00141	100.016	0	0
1	2	tiger	2	f/N	L	new_rel	0	resp_new	1	1.03173	101.629	1	0.551627	102.262	0	0
1	2	color	3	f/n	W	old_10	1	resp_old	1	9.30658	121.59	1	0.572692	122.244	0	0
1	2	night	3	f/n	W	new_rel	1	resp_new	1	3.62176	126.449	1	3.19157	129.729	0	0
1	2	grey	3	f/n	W	new_rel	1	resp_new	1	9.90478	140.209	1	9.73149	150.024	1	1
1	2	death	3	f/n	W	old_5	1	resp_new	0	4.91104	155.52	1	0.493067	156.096	0	0
1	2	thermomete	3	f/n	W	new_unrel	1	resp_new	1	1.6587	158.332	2	0.845167	159.259	0	0
1	2	ink	3	f/n	W	old_1	1	resp_old	1	4.62378	164.465	1	0.364273	164.914	0	0
1	2	black	3	f/n	W	new_crit	1	resp_new	1	2.58518	168.077	1	0.387598	168.548	0	0
1	2	cauliflowe	3	f/n	W	new_unrel	1	resp_new	1	1.23698	170.367	2	0.452001	170.909	0	0
1	2	straw	4	F/N	CU	old_5	0	resp_old	1	1.96994	176.665	2	0.40469	177.155	0	0
1	2	plastic	4	F/N	CU	new_rel	0	resp_old	0	2.7838	180.518	2	0.903115	181.506	0	0
1	2	sip	4	F/N	CU	old_10	0	resp_old	1	2.05147	184.138	2	0.462931	184.69	0	0
1	2	bullet	4	F/N	CU	new_unrel	0	resp_new	1	2.86037	188.129	3	3.1353	191.343	0	0
1	2	saucer	4	F/N	CU	new_rel	0	resp_new	1	2.83121	194.749	2	3.59178	198.42	1	1
1	2	coffee	4	F/N	CU	old_1	0	resp_old	1	4.58916	203.584	2	0.756214	204.417	0	0
1	2	fabric	4	F/N	CU	new_unrel	0	resp_new	1	1.04912	206.052	2	0.421903	206.552	0	0
1	2	cup	4	F/N	CU	new_crit	0	resp_new	1	4.56554	211.694	1	0.972562	212.753	1	1
1	2	bed	5	F/N	SLE	old_3	0	resp_old	1	3.9968	220.314	1	0.475493	220.874	0	0
1	2	yawn	5	F/N	SLE	old_1	0	resp_old	1	1.50688	222.961	2	0.463489	223.516	0	0
1	2	shark	5	F/N	SLE	new_unrel	0	resp_new	1	2.16257	226.257	2	1.4948	227.829	0	0
1	2	snooze	5	F/N	SLE	old_8	0	resp_old	1	1.89339	230.311	2	1.07324	231.474	0	0
1	2	rectangle	5	F/N	SLE	new_unrel	0	resp_new	1	1.19572	233.252	2	0.480901	233.821	0	0
1	2	slumber	5	F/N	SLE	new_rel	0	resp_new	1	4.76474	239.161	1	0.310822	239.559	0	0
1	2	sleep	5	F/N	SLE	new_crit	0	resp_old	0	2.52661	242.673	1	5.59203	248.35	1	1
1	2	snore	5	F/N	SLE	new_rel	0	resp_new	1	3.02453	251.961	2	0.718653	252.766	0	0
1	2	checkered	6	f/n	BA	old_7	1	resp_new	0	2.11602	258.201	1	1.30155	259.584	0	0
1	2	sign	6	f/n	BA	old_1	1	resp_old	1	2.86006	263.026	2	0.293812	263.399	0	0
1	2	beach	6	f/n	BA	new_unrel	1	resp_new	1	2.38574	266.362	1	0.943684	267.388	0	0
1	2	pole	6	f/n	BA	old_3	1	resp_old	1	1.57646	269.548	1	0.439861	270.066	0	0
1	2	penalty	6	f/n	BA	new_unrel	1	resp_new	1	1.45384	272.108	1	1.28213	273.477	0	0
1	2	flag	6	f/n	BA	new_crit	1	resp_old	0	1.47771	275.542	2	0.352126	275.972	0	0
1	2	anthem	6	f/n	BA	new_rel	1	resp_new	1	6.91728	283.465	2	1.03735	284.591	1	1
1	2	wave	6	f/n	BA	new_rel	1	resp_old	0	1.40156	286.567	1	1.75987	288.409	0	0
1	3	wet	1	F/n	H	old_1	1	resp_old	1	2.43882	7.00744	2	0.556818	7.65104	0	0
1	3	dandruff	1	F/n	H	new_unrel	1	resp_new	1	1.17833	9.41406	2	1.29295	10.7843	0	0
1	3	arctic	1	F/n	H	old_3	1	resp_old	1	7.16132	18.5219	1	0.896208	19.5055	1	1
1	3	heat	1	F/n	H	old_10	1	resp_old	1	1.74723	21.8262	2	0.443297	22.3487	0	0
1	3	ice	1	F/n	H	new_rel	1	resp_new	1	5.67284	28.6056	1	4.48856	33.1717	1	1
1	3	money	1	F/n	H	new_unrel	1	resp_new	1	1.94064	35.6897	2	0.592697	36.3675	0	0
1	3	cold	1	F/n	H	new_crit	1	resp_old	0	3.28464	40.2295	2	0.609612	40.922	0	0
1	3	snow	1	F/n	H	new_rel	1	resp_new	1	2.35061	43.8473	1	3.64598	47.5685	0	0
1	3	see	2	F/n	NO	old_4	1	resp_new	0	9.98691	62.3288	1	0.674979	63.0907	0	0
1	3	whiff	2	F/n	NO	new_rel	1	resp_new	1	3.44598	67.1166	1	0.599331	67.7944	0	0
1	3	servant	2	F/n	NO	new_unrel	1	resp_new	1	2.26806	70.6475	1	0.476209	71.21	0	0
1	3	aroma	2	F/n	NO	old_1	1	resp_old	1	1.70001	73.4897	3	0.469192	74.0425	0	0
1	3	reek	2	F/n	NO	old_8	1	resp_new	0	1.40685	76.0361	2	1.31098	77.4242	0	0
1	3	perfume	2	F/n	NO	new_rel	1	resp_old	0	2.74358	80.7545	1	2.36203	83.1982	0	0
1	3	smell	2	F/n	NO	new_crit	1	resp_new	1	4.10311	87.8787	1	3.0253	90.9817	1	1
1	3	barrel	2	F/n	NO	new_unrel	1	resp_new	1	2.62576	94.1922	1	0.60905	94.8866	0	0
1	3	riders	3	F/N	ROU	old_1	0	resp_old	1	3.25862	101.503	2	0.692227	102.276	0	0
1	3	agent	3	F/N	ROU	new_unrel	0	resp_new	1	1.8114	104.665	2	0.398024	105.149	0	0
1	3	sparrow	3	F/N	ROU	new_unrel	0	resp_new	1	1.53591	107.271	2	0.60366	107.966	0	0
1	3	ready	3	F/N	ROU	old_10	0	resp_new	0	2.31534	110.862	1	0.35275	111.296	0	0
1	3	coarse	3	F/N	ROU	old_4	0	resp_old	1	1.57116	113.442	2	0.516578	114.043	0	0
1	3	bumpy	3	F/N	ROU	new_rel	0	resp_new	1	1.54718	116.172	1	0.566085	116.818	0	0
1	3	rough	3	F/N	ROU	new_crit	0	resp_old	0	2.29812	119.691	2	0.375161	120.151	0	0
1	3	gravel	3	F/N	ROU	new_rel	0	resp_new	1	1.13727	121.869	3	0.685623	122.645	0	0
1	3	prince	4	f/n	QU	old_1	1	resp_old	1	1.34847	126.975	3	0.779861	127.833	0	0
1	3	monarch	4	f/n	QU	new_rel	1	resp_new	1	5.72621	134.135	1	0.899323	135.116	1	1
1	3	chess	4	f/n	QU	old_5	1	resp_old	1	1.60034	137.301	3	1.50663	138.891	0	0
1	3	yellow	4	f/n	QU	new_unrel	1	resp_new	1	1.48329	140.951	2	0.444018	141.481	0	0
1	3	oven	4	f/n	QU	new_unrel	1	resp_new	1	1.13183	143.196	2	0.650525	143.928	0	0
1	3	rule	4	f/n	QU	new_rel	1	resp_new	1	4.9526	149.457	1	0.328749	149.87	0	0
1	3	England	4	f/n	QU	old_8	1	resp_old	1	1.14926	151.604	3	0.363579	152.045	0	0
1	3	king	4	f/n	QU	new_crit	1	resp_new	1	5.71389	158.337	1	6.76157	165.178	0	0
1	3	open	5	F/n	D	old_6	1	resp_old	1	4.41285	175.943	1	0.340012	176.364	0	0
1	3	shade	5	F/n	D	new_rel	1	resp_new	1	3.00063	179.938	1	0.378561	180.398	0	0
1	3	shutter	5	F/n	D	old_11	1	resp_old	1	1.09668	182.072	2	0.363555	182.524	0	0
1	3	sash	5	F/n	D	new_rel	1	resp_new	1	1.13703	184.239	2	0.607677	184.922	0	0
1	3	chapter	5	F/n	D	new_unrel	1	resp_new	1	3.26492	188.764	2	0.387285	189.24	0	0
1	3	mayor	5	F/n	D	new_unrel	1	resp_new	1	1.1613	191.012	2	0.3584	191.451	0	0
1	3	house	5	F/n	D	old_1	1	resp_new	0	4.23192	196.266	3	1.04783	197.391	1	1
1	3	window	5	F/n	D	new_crit	1	resp_new	1	3.1007	201.072	2	6.7176	207.87	1	1
1	3	bus	6	f/N	C	old_1	0	resp_old	1	2.62598	214.765	1	1.01463	215.865	0	0
1	3	highway	6	f/N	C	new_rel	0	resp_old	0	1.8056	218.254	1	0.415292	218.747	0	0
1	3	sedan	6	f/N	C	new_rel	0	resp_new	1	1.57214	220.903	2	1.21978	222.206	0	0
1	3	moisture	6	f/N	C	new_unrel	0	resp_new	1	1.81691	224.601	2	0.40451	225.086	0	0
1	3	partner	6	f/N	C	new_unrel	0	resp_new	1	1.19005	226.856	2	0.355447	227.292	0	0
1	3	Ford	6	f/N	C	old_8	0	resp_old	1	1.58301	229.461	3	0.422352	229.97	0	0
1	3	car	6	f/N	C	new_crit	0	resp_new	1	2.9017	233.448	2	2.40032	235.929	1	1
1	3	vehicle	6	f/N	C	old_3	0	resp_old	1	1.21329	237.724	2	1.53614	239.345	0	0
1	4	dolls	1	f/n	BO	old_4	1	resp_old	1	1.85877	5.61337	2	0.996306	6.69148	0	0
1	4	daughter	1	f/n	BO	old_9	1	resp_old	1	1.02621	8.30601	3	0.644778	9.03755	0	0
1	4	episode	1	f/n	BO	new_unrel	1	resp_new	1	1.66514	11.285	1	1.37682	12.751	0	0
1	4	beautiful	1	f/n	BO	new_rel	1	resp_new	1	2.76658	16.0956	2	1.52694	17.7099	0	0
1	4	aunt	1	f/n	BO	old_1	1	resp_old	1	7.11472	25.4094	1	2.76635	28.2526	0	0
1	4	girl	1	f/n	BO	new_crit	1	resp_old	0	5.15788	33.983	1	3.60441	37.6663	0	0
1	4	dance	1	f/n	BO	new_rel	1	resp_new	1	1.62413	39.8668	2	0.713696	40.6686	0	0
1	4	schools	1	f/n	BO	new_unrel	1	resp_new	1	1.17239	42.4258	2	0.43823	42.9473	0	0
1	4	cotton	2	F/N	SO	old_1	1	resp_old	1	1.49009	48.2513	1	0.363523	48.6943	0	0
1	4	rattlesnak	2	F/N	SO	new_unrel	1	resp_new	1	2.10389	51.3765	2	0.809514	52.2652	0	0
1	4	hard	2	F/N	SO	old_5	1	resp_new	0	3.70454	56.5443	1	0.598071	57.2192	0	0
1	4	feather	2	F/N	SO	new_rel	1	resp_new	1	4.88242	62.6879	1	0.326211	63.0972	0	0
1	4	plush	2	F/N	SO	new_rel	1	resp_new	1	1.72381	65.408	1	0.363823	65.8602	0	0
1	4	canal	2	F/N	SO	new_unrel	1	resp_new	1	3.31729	69.7554	2	0.556095	70.3902	0	0
1	4	soft	2	F/N	SO	new_crit	1	resp_old	0	8.84583	79.8215	1	9.41692	89.325	1	1
1	4	pillow	2	F/N	SO	old_10	1	resp_old	1	4.54225	94.4528	1	1.53352	96.0672	0	0
1	4	orange	3	f/n	A	old_9	1	resp_old	1	2.32764	102.127	2	0.340287	102.551	0	0
1	4	ripe	3	f/n	A	new_rel	1	resp_new	1	2.30358	105.427	2	0.422651	105.929	0	0
1	4	journal	3	f/n	A	new_unrel	1	resp_new	1	1.53065	108.036	2	2.02403	110.142	0	0
1	4	player	3	f/n	A	new_unrel	1	resp_new	1	1.20806	111.937	1	0.815928	112.843	0	0
1	4	salad	3	f/n	A	new_rel	1	resp_new	1	0.961815	114.388	1	0.504209	114.972	0	0
1	4	basket	3	f/n	A	old_3	1	resp_old	1	1.35472	116.907	3	0.593287	117.586	0	0
1	4	pear	3	f/n	A	old_1	1	resp_new	0	2.67869	120.842	1	0.908667	121.84	0	0
1	4	fruit	3	f/n	A	new_crit	1	resp_new	1	2.28557	124.701	1	0.874044	125.658	0	0
1	4	puff	4	F/N	SM	old_5	0	resp_new	0	5.91974	136.211	1	0.489687	136.789	0	0
1	4	pipe	4	F/N	SM	old_1	0	resp_old	1	2.29227	139.704	2	0.592044	140.387	0	0
1	4	billows	4	F/N	SM	old_7	0	resp_old	1	1.03753	142.002	2	0.371243	142.463	0	0
1	4	stain	4	F/N	SM	new_rel	0	resp_new	1	1.52401	144.572	1	0.435083	145.096	0	0
1	4	jewel	4	F/N	SM	new_unrel	0	resp_new	1	1.30126	146.975	1	0.425992	147.484	0	0
1	4	mathematic	4	F/N	SM	new_unrel	0	resp_new	1	1.62423	149.695	2	0.282089	150.065	0	0
1	4	stink	4	F/N	SM	new_rel	0	resp_new	1	1.21926	151.859	2	0.446265	152.384	0	0
1	4	smoke	4	F/N	SM	new_crit	0	resp_new	1	2.61375	155.579	1	1.41613	157.078	1	1
1	4	draft	5	f/N	AR	old_2	0	resp_old	1	2.32155	163.121	2	0.235264	163.446	0	0
1	4	freckle	5	f/N	AR	new_unrel	0	resp_new	1	1.25436	165.279	1	0.264548	165.63	0	0
1	4	navy	5	f/N	AR	new_rel	0	resp_new	1	1.58897	167.796	2	0.299399	168.176	0	0
1	4	combat	5	f/N	AR	old_1	0	resp_old	1	1.51276	170.274	2	0.516255	170.875	0	0
1	4	crystal	5	f/N	AR	new_unrel	0	resp_new	1	1.64745	173.105	1	0.284172	173.468	0	0
1	4	air force	5	f/N	AR	new_rel	0	resp_new	1	1.46006	175.515	2	0.371186	175.967	0	0
1	4	pilot	5	f/N	AR	old_8	0	resp_new	0	1.16648	177.718	2	0.62772	178.435	0	0
1	4	army	5	f/N	AR	new_crit	0	resp_new	1	5.74987	184.77	1	2.88901	187.745	1	1
1	4	mean	6	F/n	M	old_1	2	resp_old	1	1.6995	197.257	2	1.23928	198.581	0	0
1	4	dinner	6	F/n	M	new_unrel	2	resp_new	1	2.07638	201.244	2	0.773611	202.096	0	0
1	4	wrath	6	F/n	M	old_11	2	resp_old	1	3.23502	205.913	1	0.257974	206.261	0	0
1	4	earthworm	6	F/n	M	new_unrel	2	resp_new	1	1.24263	208.087	2	0.346122	208.518	0	0
1	4	enrage	6	F/n	M	new_rel	2	resp_new	1	1.30687	210.406	2	0.30363	210.787	0	0
1	4	anger	6	F/n	M	new_crit	2	resp_old	0	1.35389	212.722	1	0.276029	213.085	0	0
1	4	hate	6	F/n	M	old_4	2	resp_old	1	1.06082	214.726	3	0.340237	215.147	0	0
1	4	rage	6	F/n	M	new_rel	2	resp_new	1	3.38191	219.102	1	0.762179	219.95	0	0
2	1	iron	1	f/N	SHI	old_10	1	resp_old	1	3.33198	7.51725	3	5.12399	12.7331	0	0
2	1	belt	1	f/N	SHI	new_rel	1	resp_new	1	3.63581	16.9615	2	3.09174	20.1353	0	0
2	1	button	1	f/N	SHI	old_6	1	resp_old	1	2.91355	23.635	2	2.14828	25.868	0	0
2	1	piano	1	f/N	SHI	new_unrel	1	resp_new	1	5.21623	31.6678	3	0.596523	32.3517	0	0
2	1	voltage	1	f/N	SHI	new_unrel	1	resp_new	1	3.89811	36.8259	3	0.524123	37.4364	0	0
2	1	pants	1	f/N	SHI	old_1	1	resp_new	0	2.15103	40.1693	1	4.35936	44.6163	0	0
2	1	shirt	1	f/N	SHI	new_crit	1	resp_new	1	5.44504	50.6459	2	4.44691	55.1779	0	0
2	1	collar	1	f/N	SHI	new_rel	1	resp_old	0	11.3052	67.06	1	6.00805	73.1564	1	1
2	1	ink	2	f/n	W	old_1	1	resp_old	1	4.45406	83.902	3	1.3415	85.3202	0	0
2	1	coal	2	f/n	W	old_7	1	resp_old	1	5.39775	91.3087	1	4.05146	95.4393	1	1
2	1	funeral	2	f/n	W	old_4	1	resp_old	1	3.86809	99.8932	3	1.60161	101.571	0	0
2	1	blue	2	f/n	W	new_rel	1	resp_new	1	2.86618	105.021	1	7.78392	112.884	1	1
2	1	thermomete	2	f/n	W	new_unrel	1	resp_new	1	6.30633	119.775	2	0.450355	120.315	0	0
2	1	black	2	f/n	W	new_crit	1	resp_new	1	5.06962	125.961	2	5.47898	131.527	1	1
2	1	cauliflowe	2	f/n	W	new_unrel	1	resp_new	1	3.65781	135.769	3	0.380109	136.236	0	0
2	1	bottom	2	f/n	W	new_rel	1	resp_new	1	1.87626	138.691	2	0.573676	139.348	0	0
2	1	stink	3	F/N	SM	old_10	0	resp_new	0	4.30768	148.825	1	1.31626	150.218	0	0
2	1	lungs	3	F/N	SM	old_3	0	resp_new	0	1.98802	152.782	1	0.762504	153.622	0	0
2	1	ashes	3	F/N	SM	new_rel	0	resp_old	0	2.18083	156.386	1	1.63741	158.108	0	0
2	1	stain	3	F/N	SM	new_rel	0	resp_old	0	1.44236	160.125	2	0.721523	160.937	0	0
2	1	mathematic	3	F/N	SM	new_unrel	0	resp_new	1	3.11849	164.64	2	2.73035	167.45	0	0
2	1	chimney	3	F/N	SM	old_1	0	resp_old	1	1.41266	169.45	3	1.60427	171.135	0	0
2	1	jewel	3	F/N	SM	new_unrel	0	resp_new	1	2.87752	174.594	2	0.78261	175.457	0	0
2	1	smoke	3	F/N	SM	new_crit	0	resp_old	0	7.61126	183.644	2	5.4145	189.136	1	1
2	1	slumber	4	F/N	SLE	old_4	0	resp_old	1	8.26322	202.792	1	2.85248	205.723	1	1
2	1	shark	4	F/N	SLE	new_unrel	0	resp_new	1	1.57114	207.88	3	2.80597	210.767	0	0
2	1	bed	4	F/N	SLE	new_rel	0	resp_new	1	3.69843	215.044	1	9.12164	224.252	1	1
2	1	rest	4	F/N	SLE	new_rel	0	resp_new	1	8.35677	233.188	1	0.673633	233.94	1	1
2	1	peace	4	F/N	SLE	old_7	0	resp_old	1	4.13773	238.657	3	0.594241	239.338	0	0
2	1	rectangle	4	F/N	SLE	new_unrel	0	resp_new	1	2.21804	242.134	2	0.734211	242.956	0	0
2	1	snore	4	F/N	SLE	old_1	0	resp_old	1	1.34881	244.89	3	0.340857	245.308	0	0
2	1	sleep	4	F/N	SLE	new_crit	0	resp_old	0	5.47539	251.362	1	4.42521	255.868	1	1
2	1	fly	5	f/n	WE	old_1	1	resp_new	0	3.07721	262.129	1	0.494244	262.705	0	0
2	1	small	5	f/n	WE	new_rel	1	resp_new	1	1.88802	265.178	1	0.978464	266.24	0	0
2	1	feelers	5	f/n	WE	new_rel	1	resp_new	1	1.60634	268.427	1	0.434515	268.948	0	0
2	1	crawl	5	f/n	WE	old_9	1	resp_new	0	1.07838	270.605	1	0.521629	271.207	0	0
2	1	organ	5	f/n	WE	new_unrel	1	resp_old	0	3.22005	275.012	1	0.638018	275.734	0	0
2	1	spider	5	f/n	WE	new_crit	1	resp_old	0	3.73385	280.043	2	2.60967	282.73	0	0
2	1	bridge	5	f/n	WE	new_unrel	1	resp_new	1	3.72156	287.026	2	1.93709	289.053	0	0
2	1	insect	5	f/n	WE	old_4	1	resp_old	1	4.26045	293.895	1	1.66247	295.641	1	1
2	1	downy	6	F/N	SO	old_8	0	resp_old	1	3.11366	303.129	1	8.5108	311.724	1	1
2	1	loud	6	F/N	SO	old_1	0	resp_old	1	6.75705	319.059	1	2.48877	321.627	1	1
2	1	kitten	6	F/N	SO	new_rel	0	resp_new	1	2.11001	324.313	2	0.699381	325.101	0	0
2	1	rattlesnak	6	F/N	SO	new_unrel	0	resp_new	1	1.17831	326.859	2	1.13715	328.084	0	0
2	1	canal	6	F/N	SO	new_unrel	0	resp_new	1	1.60022	330.266	2	1.06099	331.406	0	0
2	1	feather	6	F/N	SO	old_6	0	resp_old	1	1.2475	333.231	2	1.1319	334.448	0	0
2	1	light	6	F/N	SO	new_rel	0	resp_old	0	1.78216	336.804	1	1.18431	338.072	0	0
2	1	soft	6	F/N	SO	new_crit	0	resp_old	0	1.28997	339.937	2	9.20915	349.228	1	1
2	2	shoe	1	f/N	FO	old_12	0	resp_new	0	6.63862	9.20177	2	2.30371	11.583	1	1
2	2	arm	1	f/N	FO	old_1	0	resp_old	1	2.28726	14.4449	3	3.40812	17.9378	0	0
2	2	south	1	f/N	FO	new_unrel	0	resp_new	1	1.56572	20.0798	2	0.361699	20.5281	0	0
2	2	soccer	1	f/N	FO	new_rel	0	resp_new	1	4.07363	25.1862	2	3.20663	28.4768	1	1
2	2	movie	1	f/N	FO	new_unrel	0	resp_new	1	3.6749	32.7296	3	0.630028	33.4426	0	0
2	2	inch	1	f/N	FO	new_rel	0	resp_new	1	4.58348	38.6087	2	1.63551	40.3247	1	1
2	2	foot	1	f/N	FO	new_crit	0	resp_old	0	1.84091	42.7422	2	0.392751	43.2129	0	0
2	2	sock	1	f/N	FO	old_3	0	resp_new	0	1.44192	45.2349	2	2.41147	47.7235	1	1
2	2	dolls	2	f/n	BO	old_1	1	resp_new	0	7.30279	57.8652	2	5.61561	63.5605	1	1
2	2	niece	2	f/n	BO	new_rel	1	resp_new	1	2.8837	67.025	1	1.35563	68.4686	0	0
2	2	pretty	2	f/n	BO	old_2	1	resp_new	0	2.18081	71.226	2	1.62078	72.9314	0	0
2	2	hair	2	f/n	BO	new_rel	1	resp_new	1	1.96944	75.4787	2	2.04457	77.606	0	0
2	2	female	2	f/n	BO	old_8	1	resp_new	0	2.6273	80.8147	1	1.832	82.7379	1	1
2	2	episode	2	f/n	BO	new_unrel	1	resp_new	1	3.32296	86.64	2	0.373511	87.1019	0	0
2	2	schools	2	f/n	BO	new_unrel	1	resp_new	1	2.2623	89.9502	3	1.62427	91.6575	0	0
2	2	girl	2	f/n	BO	new_crit	1	resp_old	0	1.41323	93.6452	3	3.33054	97.055	0	0
2	2	arctic	3	F/n	H	old_1	2	resp_old	1	1.93417	102.988	3	1.19757	104.263	0	0
2	2	chilly	3	F/n	H	old_11	2	resp_old	1	1.21957	106.058	2	0.283811	106.428	0	0
2	2	dandruff	3	F/n	H	new_unrel	2	resp_new	1	1.1846	108.195	2	1.11121	109.387	0	0
2	2	ice	3	F/n	H	new_rel	2	resp_new	1	2.27392	112.242	2	4.83704	117.164	1	1
2	2	money	3	F/n	H	new_unrel	2	resp_new	1	2.71358	120.451	2	0.257986	120.794	0	0
2	2	weather	3	F/n	H	old_6	2	resp_old	1	3.27076	124.646	3	1.72262	126.456	0	0
2	2	cold	3	F/n	H	new_crit	2	resp_old	0	2.8544	129.893	2	1.05865	131.029	0	0
2	2	freeze	3	F/n	H	new_rel	2	resp_new	1	2.19847	133.808	1	2.36551	136.254	1	1
2	2	food	4	f/N	BR	old_1	0	resp_old	1	2.62595	144.376	2	0.711952	145.167	0	0
2	2	slice	4	f/N	BR	old_4	0	resp_old	1	2.12791	147.876	1	1.3086	149.269	0	0
2	2	eat	4	f/N	BR	old_10	0	resp_new	0	2.88387	152.736	1	2.22025	155.044	1	1
2	2	jam	4	f/N	BR	new_rel	0	resp_old	0	7.77108	163.394	1	4.25314	167.724	0	0
2	2	loaf	4	f/N	BR	new_rel	0	resp_old	0	4.88272	173.191	1	2.39115	175.67	0	0
2	2	model	4	f/N	BR	new_unrel	0	resp_new	1	1.87609	178.127	2	1.03161	179.241	0	0
2	2	judge	4	f/N	BR	new_unrel	0	resp_new	1	1.1142	180.936	3	1.38645	182.408	0	0
2	2	bread	4	f/N	BR	new_crit	0	resp_new	1	4.13788	187.131	3	2.90243	190.12	1	1
2	2	cushion	5	F/n	TA	old_1	1	resp_new	0	4.49531	200.028	2	1.42712	201.544	1	1
2	2	poem	5	F/n	TA	new_unrel	1	resp_new	1	4.5888	206.718	2	0.59123	207.398	0	0
2	2	table	5	F/n	TA	old_11	1	resp_old	1	1.81163	209.791	3	1.46064	211.332	0	0
2	2	legs	5	F/n	TA	new_rel	1	resp_new	1	1.95162	213.862	2	0.194039	214.143	0	0
2	2	bench	5	F/n	TA	new_rel	1	resp_new	1	1.3366	216.059	2	2.57916	218.727	1	1
2	2	chair	5	F/n	TA	new_crit	1	resp_old	0	3.57606	222.882	3	0.45745	223.428	0	0
2	2	helmet	5	F/n	TA	new_unrel	1	resp_new	1	1.03168	225.042	2	0.0831784	225.213	0	0
2	2	wood	5	F/n	TA	old_5	1	resp_old	1	2.08052	227.876	3	0.24209	228.197	0	0
2	2	apple	6	f/n	A	old_1	1	resp_old	1	1.49513	232.168	3	0.911118	233.156	0	0
2	2	journal	6	f/n	A	new_unrel	1	resp_new	1	2.13404	235.872	2	0.893012	236.844	0	0
2	2	pear	6	f/n	A	old_6	1	resp_new	0	2.80818	240.238	1	2.33868	242.66	1	1
2	2	cocktail	6	f/n	A	old_9	1	resp_old	1	2.68445	245.924	3	0.448904	246.46	0	0
2	2	juice	6	f/n	A	new_rel	1	resp_new	1	3.92664	250.964	1	1.25368	252.302	0	0
2	2	player	6	f/n	A	new_unrel	1	resp_new	1	1.67301	254.56	3	0.588179	255.234	0	0
2	2	cherry	6	f/n	A	new_rel	1	resp_new	1	2.76657	258.585	1	1.87216	260.542	1	1
2	2	fruit	6	f/n	A	new_crit	1	resp_old	0	4.60092	265.723	2	2.77174	268.571	0	0
2	3	ready	1	F/N	ROU	old_4	0	resp_new	0	8.33428	10.7165	1	2.12957	12.9337	0	0
2	3	road	1	F/N	ROU	new_rel	0	resp_old	0	3.93316	17.4423	2	2.38445	19.9047	0	0
2	3	sparrow	1	F/N	ROU	new_unrel	0	resp_new	1	1.88207	22.3739	2	1.21768	23.6818	0	0
2	3	ground	1	F/N	ROU	old_1	0	resp_old	1	1.93485	26.1979	3	1.16406	27.4393	0	0
2	3	uneven	1	F/N	ROU	new_rel	0	resp_old	0	7.61548	35.6371	1	1.59448	37.3184	1	1
2	3	rough	1	F/N	ROU	new_crit	0	resp_new	1	4.48339	42.3786	3	0.8962	43.3622	0	0
2	3	smooth	1	F/N	ROU	old_11	0	resp_old	1	2.10998	46.0551	3	0.334105	46.478	0	0
2	3	agent	1	F/N	ROU	new_unrel	0	resp_new	1	1.64163	48.705	3	1.10729	49.8898	0	0
2	3	uniform	2	f/N	AR	old_8	0	resp_old	1	2.18019	54.4806	3	1.67607	56.2419	0	0
2	3	united state	2	f/N	AR	old_4	0	resp_new	0	1.42419	58.242	3	0.626477	58.9501	0	0
2	3	freckle	2	f/N	AR	new_unrel	0	resp_new	1	1.67699	61.2132	3	0.407301	61.7025	0	0
2	3	crystal	2	f/N	AR	new_unrel	0	resp_new	1	0.996743	63.2781	3	0.641072	64.0018	0	0
2	3	pilot	2	f/N	AR	new_rel	0	resp_new	1	3.23033	67.817	2	0.882077	68.7869	1	1
2	3	army	2	f/N	AR	new_crit	0	resp_new	1	2.75482	72.1254	3	0.414545	72.6236	0	0
2	3	navy	2	f/N	AR	old_1	0	resp_old	1	1.85212	75.0606	3	1.13199	76.2727	0	0
2	3	soldier	2	f/N	AR	new_rel	0	resp_new	1	1.96916	78.8288	2	2.188	81.0999	1	1
2	3	sill	3	F/n	D	old_12	1	resp_new	0	14.275	99.0768	2	6.3208	105.474	1	1
2	3	open	3	F/n	D	old_6	1	resp_old	1	2.93636	108.993	2	1.54409	110.612	0	0
2	3	breeze	3	F/n	D	new_rel	1	resp_new	1	1.51661	112.703	2	0.326728	113.113	0	0
2	3	chapter	3	F/n	D	new_unrel	1	resp_new	1	3.46436	117.156	3	0.339662	117.576	0	0
2	3	mayor	3	F/n	D	new_unrel	1	resp_new	1	0.768893	118.925	3	0.171169	119.18	0	0
2	3	pane	3	F/n	D	old_1	1	resp_old	1	1.34817	121.103	3	2.60247	123.784	0	0
2	3	window	3	F/n	D	new_crit	1	resp_old	0	5.84366	130.21	2	1.57152	131.867	1	1
2	3	shade	3	F/n	D	new_rel	1	resp_new	1	4.03802	136.479	2	0.611013	137.17	0	0
2	3	stein	4	F/N	CU	old_1	0	resp_old	1	2.05234	142.782	3	0.173157	143.035	0	0
2	3	mug	4	F/N	CU	new_rel	0	resp_new	1	2.97745	146.586	2	1.0748	147.748	1	1
2	3	handle	4	F/N	CU	old_8	0	resp_old	1	1.75298	150.079	2	1.08021	151.245	0	0
2	3	fabric	4	F/N	CU	new_unrel	0	resp_new	1	0.979502	152.81	3	0.56175	153.458	0	0
2	3	bullet	4	F/N	CU	new_unrel	0	resp_new	1	0.815463	154.858	3	0.164821	155.1	0	0
2	3	cup	4	F/N	CU	new_crit	0	resp_new	1	2.98961	158.671	3	1.2104	159.97	1	1
2	3	measuring	4	F/N	CU	new_rel	0	resp_new	1	4.7236	165.269	2	0.286117	165.642	0	0
2	3	straw	4	F/N	CU	old_3	0	resp_new	0	2.64912	168.871	3	0.18589	169.14	0	0
2	3	mad	5	F/n	M	old_12	1	resp_old	1	5.23442	175.961	3	1.76349	177.807	0	0
2	3	earthworm	5	F/n	M	new_unrel	1	resp_new	1	1.44241	179.832	3	0.432045	180.354	0	0
2	3	rage	5	F/n	M	old_1	1	resp_old	1	1.13138	182.065	3	0.786053	182.932	0	0
2	3	dinner	5	F/n	M	new_unrel	1	resp_new	1	0.908542	184.414	3	1.52822	186.02	0	0
2	3	mean	5	F/n	M	new_rel	1	resp_new	1	2.86006	189.457	2	1.59689	191.139	1	1
2	3	enrage	5	F/n	M	new_rel	1	resp_new	1	1.51214	193.226	2	1.03627	194.349	1	1
2	3	fury	5	F/n	M	old_6	1	resp_old	1	1.30119	196.227	2	0.785558	197.097	0	0
2	3	anger	5	F/n	M	new_crit	1	resp_old	0	3.31186	200.983	2	0.4044	201.473	0	0
2	3	stench	6	F/n	NO	old_6	2	resp_old	1	5.44143	210.961	2	1.48767	212.537	1	1
2	3	rose	6	F/n	NO	new_rel	2	resp_new	1	1.10226	214.218	3	0.237719	214.539	0	0
2	3	see	6	F/n	NO	new_rel	2	resp_new	1	0.967033	216.081	3	6.28752	222.454	0	0
2	3	servant	6	F/n	NO	new_unrel	2	resp_new	1	0.99639	224.026	3	0.0957912	224.205	0	0
2	3	barrel	6	F/n	NO	new_unrel	2	resp_new	1	1.17819	225.967	3	0.12409	226.179	0	0
2	3	breathe	6	F/n	NO	old_12	2	resp_new	0	3.20967	229.97	1	0.144747	230.197	1	1
2	3	smell	6	F/n	NO	new_crit	2	resp_old	0	4.19759	234.969	1	0.92604	235.975	0	0
2	3	whiff	6	F/n	NO	old_1	2	resp_old	1	1.72343	238.279	2	0.770917	239.138	0	0
2	4	litter	1	F/N	T	old_5	0	resp_old	1	3.9976	7.47072	2	4.04277	11.5936	1	1
2	4	refuse	1	F/N	T	new_rel	0	resp_new	1	1.63596	13.8108	2	1.89481	15.7886	0	0
2	4	waste	1	F/N	T	old_12	0	resp_old	1	1.08454	17.4569	2	2.38598	19.931	0	0
2	4	pony	1	F/N	T	new_unrel	0	resp_new	1	1.11353	21.6169	3	0.285335	21.988	0	0
2	4	scholar	1	F/N	T	new_unrel	0	resp_new	1	1.10801	23.6769	3	0.0577344	23.8126	0	0
2	4	sweep	1	F/N	T	new_rel	0	resp_old	0	1.27787	25.6724	2	2.83519	28.5889	1	1
2	4	trash	1	F/N	T	new_crit	0	resp_old	0	2.02196	31.1871	3	0.272973	31.5435	0	0
2	4	garbage	1	F/N	T	old_1	0	resp_old	1	2.02807	34.1515	2	0.254667	34.4835	0	0
2	4	rule	2	f/n	QU	old_1	1	resp_new	0	1.94079	38.3418	1	0.772792	39.1993	0	0
2	4	George	2	f/n	QU	new_rel	1	resp_new	1	1.89141	41.6771	3	0.116014	41.874	0	0
2	4	oven	2	f/n	QU	new_unrel	1	resp_new	1	0.984622	43.4355	3	0.485037	44.002	0	0
2	4	chess	2	f/n	QU	old_10	1	resp_old	1	1.30706	45.89	3	0.347986	46.3168	0	0
2	4	yellow	2	f/n	QU	new_unrel	1	resp_new	1	1.66468	48.5663	3	0.0898817	48.7372	0	0
2	4	king	2	f/n	QU	new_crit	1	resp_new	1	1.22583	50.5394	3	0.610349	51.2299	0	0
2	4	England	2	f/n	QU	new_rel	1	resp_new	1	0.97352	52.779	3	0.0326292	52.8909	0	0
2	4	monarch	2	f/n	QU	old_5	1	resp_old	1	1.47715	54.9484	2	1.4166	56.4469	0	0
2	4	national	3	f/n	BA	old_8	1	resp_new	0	2.73155	60.9467	3	0.134505	61.1614	0	0
2	4	pole	3	f/n	BA	new_rel	1	resp_new	1	1.14869	62.8952	2	2.13022	65.1027	1	1
2	4	penalty	3	f/n	BA	new_unrel	1	resp_new	1	2.9775	68.6551	3	0.07957	68.8221	0	0
2	4	pendant	3	f/n	BA	new_rel	1	resp_new	1	0.633256	70.0421	3	0.059795	70.1882	0	0
2	4	anthem	3	f/n	BA	old_5	1	resp_old	1	1.65337	72.4214	3	0.273592	72.774	0	0
2	4	flag	3	f/n	BA	new_crit	1	resp_old	0	3.72727	77.0805	2	0.739459	77.9038	1	1
2	4	beach	3	f/n	BA	new_unrel	1	resp_new	1	0.996741	79.4804	3	0.488847	80.0519	0	0
2	4	emblem	3	f/n	BA	old_1	1	resp_old	1	1.33124	81.9603	3	0.116293	82.1579	0	0
2	4	honey	4	F/n	HON	old_12	1	resp_old	1	2.5737	86.9739	3	0.191395	87.2445	0	0
2	4	city	4	F/n	HON	new_unrel	1	resp_new	1	1.97004	89.7958	3	0.139574	90.0175	0	0
2	4	nice	4	F/n	HON	new_rel	1	resp_new	1	1.554	92.1507	2	0.376898	92.6127	0	0
2	4	sugar	4	F/n	HON	old_1	1	resp_new	0	1.75289	94.9481	1	0.270387	95.3046	0	0
2	4	candy	4	F/n	HON	old_6	1	resp_old	1	0.938435	96.8255	3	0.173083	97.0862	0	0
2	4	sweet	4	F/n	HON	new_crit	1	resp_old	0	0.950344	98.623	3	0.0931557	98.8052	0	0
2	4	soda	4	F/n	HON	new_rel	1	resp_old	0	0.774216	100.166	1	2.78807	103.033	0	0
2	4	alligator	4	F/n	HON	new_unrel	1	resp_new	1	2.29821	105.914	3	0.0595323	106.061	0	0
2	4	garage	5	f/N	C	old_1	0	resp_old	1	2.96636	111.926	2	3.49158	115.503	0	0
2	4	taxi	5	f/N	C	old_8	0	resp_old	1	1.06723	117.143	3	0.432992	117.655	0	0
2	4	race	5	f/N	C	old_3	0	resp_old	1	0.961831	119.196	3	0.179012	119.453	0	0
2	4	train	5	f/N	C	new_rel	0	resp_new	1	2.18077	122.214	1	1.05717	123.356	1	1
2	4	moisture	5	f/N	C	new_unrel	0	resp_new	1	3.34662	127.284	3	0.728655	128.091	0	0
2	4	car	5	f/N	C	new_crit	0	resp_new	1	3.55637	132.225	1	6.09436	138.401	1	1
2	4	jeep	5	f/N	C	new_rel	0	resp_new	1	5.63229	144.615	2	0.750623	145.45	0	0
2	4	partner	5	f/N	C	new_unrel	0	resp_new	1	1.62945	147.661	3	0.0773153	147.828	0	0
2	4	roar	6	f/N	L	old_12	0	resp_old	1	1.91684	151.84	2	0.205101	152.127	0	0
2	4	cousin	6	f/N	L	new_unrel	0	resp_new	1	1.0199	153.728	3	0.215523	154.029	0	0
2	4	hunt	6	f/N	L	old_1	0	resp_new	0	1.76417	156.378	2	1.06343	157.529	0	0
2	4	number	6	f/N	L	new_unrel	0	resp_new	1	2.92508	161.03	3	0.716293	161.833	0	0
2	4	den	6	f/N	L	new_rel	0	resp_new	1	1.09008	163.499	2	0.972249	164.554	0	0
2	4	feline	6	f/N	L	new_rel	0	resp_new	1	0.833038	165.961	2	1.66001	167.707	0	0
2	4	lion	6	f/N	L	new_crit	0	resp_new	1	1.91684	170.203	1	1.39482	171.679	1	1
2	4	mane	6	f/N	L	old_3	0	resp_new	0	2.51501	174.772	1	3.79413	178.649	1	1
3	1	plush	1	F/N	SO	old_6	0	resp_old	1	4.7731	7.44717	3	1.56961	9.10849	0	0
3	1	loud	1	F/N	SO	new_rel	0	resp_new	1	1.57873	11.272	3	0.741825	12.1046	0	0
3	1	fluffy	1	F/N	SO	new_rel	0	resp_old	0	4.04471	16.7344	2	1.24383	18.0859	0	0
3	1	canal	1	F/N	SO	new_unrel	0	resp_new	1	1.52431	20.1927	3	0.527207	20.8079	0	0
3	1	rattlesnak	1	F/N	SO	new_unrel	0	resp_new	1	0.691816	22.0855	3	0.495551	22.6598	0	0
3	1	touch	1	F/N	SO	old_1	0	resp_old	1	5.62653	28.8609	3	4.15591	33.0978	0	0
3	1	cotton	1	F/N	SO	old_10	0	resp_old	1	1.80575	35.4849	2	0.358868	35.9215	0	0
3	1	soft	1	F/N	SO	new_crit	0	resp_new	1	7.35383	43.8582	3	2.01476	45.9532	1	1
3	1	swivel	2	F/n	TA	old_1	1	resp_old	1	1.58282	51.5712	3	0.222898	51.8808	0	0
3	1	poem	2	F/n	TA	new_unrel	1	resp_new	1	1.03192	53.5032	3	0.574335	54.1585	0	0
3	1	sitting	2	F/n	TA	old_4	1	resp_old	1	1.65329	56.3932	2	1.4957	57.9764	0	0
3	1	stool	2	F/n	TA	new_rel	1	resp_new	1	3.41075	61.9605	1	0.368941	62.4146	0	0
3	1	helmet	2	F/n	TA	new_unrel	1	resp_new	1	1.10763	64.1092	3	0.258647	64.4588	0	0
3	1	sit	2	F/n	TA	new_rel	1	resp_old	0	3.25919	68.3012	2	0.238648	68.6196	0	0
3	1	chair	2	F/n	TA	new_crit	1	resp_old	0	2.09861	71.2929	3	1.88941	73.2668	0	0
3	1	sofa	2	F/n	TA	old_8	1	resp_new	0	1.06664	74.9125	2	1.60443	76.6061	0	0
3	1	snooze	3	F/N	SLE	old_1	0	resp_old	1	1.31369	79.9682	2	0.268653	80.3215	0	0
3	1	nap	3	F/N	SLE	old_3	0	resp_old	1	2.88964	83.7986	2	0.25376	84.1306	0	0
3	1	slumber	3	F/N	SLE	new_rel	0	resp_new	1	1.41908	86.1378	3	3.06678	89.2837	0	0
3	1	wake	3	F/N	SLE	new_rel	0	resp_old	0	1.03727	90.907	3	0.360578	91.3576	0	0
3	1	shark	3	F/N	SLE	new_unrel	0	resp_new	1	1.33682	93.2756	3	0.252662	93.6183	0	0
3	1	sleep	3	F/N	SLE	new_crit	0	resp_new	1	19.2425	113.436	3	0.281309	113.809	2	1
3	1	snore	3	F/N	SLE	old_7	0	resp_old	1	2.92494	117.309	3	0.55982	117.955	0	0
3	1	rectangle	3	F/N	SLE	new_unrel	0	resp_new	1	1.52407	120.061	3	1.56603	121.714	0	0
3	1	handle	4	F/N	CU	old_1	0	resp_new	0	0.785886	124.373	1	3.08382	127.541	0	0
3	1	bullet	4	F/N	CU	new_unrel	0	resp_new	1	1.02057	129.145	3	0.282301	129.505	0	0
3	1	fabric	4	F/N	CU	new_unrel	0	resp_new	1	7.94731	138.041	3	0.317298	138.444	0	0
3	1	measuring	4	F/N	CU	new_rel	0	resp_new	1	0.786108	139.812	2	0.371466	140.268	0	0
3	1	mug	4	F/N	CU	old_2	0	resp_old	1	1.36013	142.212	3	0.282257	142.576	0	0
3	1	tea	4	F/N	CU	new_rel	0	resp_new	1	2.97178	146.121	1	0.66619	146.869	0	0
3	1	cup	4	F/N	CU	new_crit	0	resp_new	1	1.9109	149.355	3	1.99282	151.435	1	1
3	1	lid	4	F/N	CU	old_9	0	resp_new	0	2.94206	154.953	1	0.158262	155.194	0	0
3	1	frame	5	F/n	D	old_9	1	resp_old	1	2.0749	159.422	3	0.82681	160.328	0	0
3	1	screen	5	F/n	D	old_2	1	resp_old	1	1.80506	162.719	2	0.35421	163.152	0	0
3	1	mayor	5	F/n	D	new_unrel	1	resp_new	1	0.785447	164.511	3	0.258689	164.854	0	0
3	1	chapter	5	F/n	D	new_unrel	1	resp_new	1	0.797006	166.234	3	0.141814	166.464	0	0
3	1	ledge	5	F/n	D	new_rel	1	resp_old	0	2.11591	169.166	2	0.0501246	169.297	0	0
3	1	window	5	F/n	D	new_crit	1	resp_new	1	4.80602	174.681	2	3.23056	178	1	1
3	1	breeze	5	F/n	D	new_rel	1	resp_new	1	3.1179	181.697	3	0.317933	182.093	0	0
3	1	door	5	F/n	D	old_1	1	resp_old	1	6.02449	188.699	3	0.120542	188.902	0	0
3	1	raised	6	f/n	BA	old_2	1	resp_new	0	5.33937	195.918	1	0.0148263	196.016	0	0
3	1	beach	6	f/n	BA	new_unrel	1	resp_new	1	0.844845	197.445	3	0.168858	197.697	0	0
3	1	emblem	6	f/n	BA	old_1	1	resp_old	1	1.23727	199.522	3	0.07235	199.684	0	0
3	1	penalty	6	f/n	BA	new_unrel	1	resp_new	1	0.808833	201.076	3	0.0319687	201.199	0	0
3	1	stars	6	f/n	BA	new_rel	1	resp_new	1	1.23119	203.011	3	0.0100728	203.103	0	0
3	1	anthem	6	f/n	BA	new_rel	1	resp_old	0	1.7117	205.39	2	0.0300666	205.506	0	0
3	1	flag	6	f/n	BA	new_crit	1	resp_old	0	3.84488	209.934	2	0.331143	210.344	0	0
3	1	sign	6	f/n	BA	old_10	1	resp_old	1	7.75025	218.677	1	0.308224	219.068	1	1
3	2	dictator	1	f/n	QU	old_7	1	resp_old	1	4.00911	5.92264	3	0.0322589	6.04096	0	0
3	2	subjects	1	f/n	QU	new_rel	1	resp_old	0	3.1535	9.77573	2	0.064837	9.92609	0	0
3	2	royal	1	f/n	QU	old_5	1	resp_old	1	1.59988	12.1032	3	0.117311	12.3044	0	0
3	2	oven	1	f/n	QU	new_unrel	1	resp_new	1	0.926232	13.8125	3	0.394618	14.294	0	0
3	2	yellow	1	f/n	QU	new_unrel	1	resp_new	1	0.738994	15.6086	3	0.209244	15.9065	0	0
3	2	palace	1	f/n	QU	old_1	1	resp_old	1	1.46009	17.9421	2	1.76394	19.787	0	0
3	2	monarch	1	f/n	QU	new_rel	1	resp_new	1	2.57867	22.9418	2	0.192614	23.224	0	0
3	2	king	1	f/n	QU	new_crit	1	resp_new	1	5.29998	29.1019	1	0.48708	29.6683	1	1
3	2	bitter	2	F/n	HON	old_1	1	resp_old	1	2.0284	33.3642	2	0.210548	33.6582	0	0
3	2	city	2	F/n	HON	new_unrel	1	resp_new	1	0.984645	35.217	3	0.589344	35.8919	0	0
3	2	taste	2	F/n	HON	old_2	1	resp_old	1	2.69619	39.1688	2	0.189159	39.4442	0	0
3	2	nice	2	F/n	HON	new_rel	1	resp_new	1	2.95438	42.9799	2	0.422966	43.4878	0	0
3	2	tooth	2	F/n	HON	old_9	1	resp_old	1	1.41271	45.4763	2	0.133263	45.6951	0	0
3	2	tart	2	F/n	HON	new_rel	1	resp_new	1	1.34204	47.6173	3	0.135867	47.838	0	0
3	2	sweet	2	F/n	HON	new_crit	1	resp_old	0	1.71186	50.1275	3	0.728761	50.9422	0	0
3	2	alligator	2	F/n	HON	new_unrel	1	resp_new	1	1.91133	53.4375	3	0.144363	53.669	0	0
3	2	tamer	3	f/N	L	old_5	0	resp_old	1	1.14881	56.2573	3	0.118973	56.4545	0	0
3	2	jungle	3	f/N	L	new_rel	0	resp_new	1	1.12596	58.1599	2	0.143554	58.3904	0	0
3	2	number	3	f/N	L	new_unrel	0	resp_new	1	1.09779	60.0723	3	0.15369	60.3125	0	0
3	2	Africa	3	f/N	L	old_1	0	resp_old	1	1.65293	62.5395	3	0.101575	62.7289	0	0
3	2	hunt	3	f/N	L	new_rel	0	resp_new	1	6.85827	70.1705	2	0.174643	70.4215	1	1
3	2	lion	3	f/N	L	new_crit	0	resp_new	1	1.45383	72.457	3	0.119826	72.664	0	0
3	2	cub	3	f/N	L	old_9	0	resp_old	1	3.20642	76.4498	1	0.921759	77.4469	0	0
3	2	cousin	3	f/N	L	new_unrel	0	resp_new	1	0.827073	78.8505	3	0.11013	79.0468	0	0
3	2	dress	4	f/n	BO	old_7	1	resp_new	0	4.0431	84.4637	1	1.73506	86.2793	1	1
3	2	episode	4	f/n	BO	new_unrel	1	resp_new	1	2.46797	89.3238	3	0.0593394	89.4693	0	0
3	2	beautiful	4	f/n	BO	old_4	1	resp_old	1	0.867688	90.9197	3	0.0854937	91.0935	0	0
3	2	dance	4	f/n	BO	old_1	1	resp_old	1	0.792004	92.4707	3	0.14529	92.6944	0	0
3	2	dolls	4	f/n	BO	new_rel	1	resp_new	1	1.27821	94.555	1	0.194189	94.8265	0	0
3	2	sister	4	f/n	BO	new_rel	1	resp_new	1	2.91351	98.3163	1	0.0683834	98.4677	0	0
3	2	girl	4	f/n	BO	new_crit	1	resp_old	0	1.33092	100.372	3	0.443744	100.898	0	0
3	2	schools	4	f/n	BO	new_unrel	1	resp_new	1	5.98996	107.471	2	0.305705	107.866	0	0
3	2	highway	5	f/N	C	old_6	0	resp_new	0	2.09234	111.336	1	0.316698	111.743	0	0
3	2	partner	5	f/N	C	new_unrel	0	resp_new	1	1.03201	113.358	3	0.284325	113.723	0	0
3	2	drive	5	f/N	C	new_rel	0	resp_old	0	1.21399	115.523	2	0.59039	116.198	0	0
3	2	vehicle	5	f/N	C	old_11	0	resp_old	1	1.12573	117.903	3	0.166738	118.157	0	0
3	2	moisture	5	f/N	C	new_unrel	0	resp_new	1	0.984661	119.717	3	0.113698	119.916	0	0
3	2	Ford	5	f/N	C	old_1	0	resp_old	1	0.897219	121.399	3	0.231288	121.718	0	0
3	2	taxi	5	f/N	C	new_rel	0	resp_new	1	2.6702	124.97	1	0.335266	125.389	0	0
3	2	car	5	f/N	C	new_crit	0	resp_new	1	2.43428	128.401	3	0.196404	128.674	2	1
3	2	food	6	f/N	BR	old_9	0	resp_new	0	2.4028	132.522	1	0.0732969	132.675	0	0
3	2	rye	6	f/N	BR	old_6	0	resp_old	1	0.902724	134.161	3	0.0928653	134.335	0	0
3	2	toast	6	f/N	BR	old_1	0	resp_old	1	1.22522	136.138	3	0.0413639	136.267	0	0
3	2	jelly	6	f/N	BR	new_rel	0	resp_new	1	1.21379	138.068	2	0.494336	138.647	0	0
3	2	wine	6	f/N	BR	new_rel	0	resp_new	1	0.991173	140.214	3	0.153123	140.446	0	0
3	2	judge	6	f/N	BR	new_unrel	0	resp_new	1	2.94248	143.964	3	0.527228	144.573	0	0
3	2	bread	6	f/N	BR	new_crit	0	resp_new	1	1.71835	146.877	3	0.0510353	147.007	2	1
3	2	model	6	f/N	BR	new_unrel	0	resp_new	1	3.57532	151.159	1	0.282853	151.52	0	0
3	3	chimney	1	F/N	SM	old_4	0	resp_old	1	2.52606	4.00379	2	0.112114	4.20105	0	0
3	3	billows	1	F/N	SM	old_1	0	resp_old	1	1.3842	6.17228	3	0.106664	6.36444	0	0
3	3	mathematic	1	F/N	SM	new_unrel	0	resp_new	1	1.06109	8.00377	3	0.0832625	8.16745	0	0
3	3	pipe	1	F/N	SM	new_rel	0	resp_new	1	3.73658	12.4914	1	0.0690044	12.6479	1	1
3	3	jewel	1	F/N	SM	new_unrel	0	resp_new	1	1.21935	14.4546	3	0.108379	14.6421	0	0
3	3	smoke	1	F/N	SM	new_crit	0	resp_new	1	3.67125	18.8898	3	0.233002	19.2043	3	1
3	3	puff	1	F/N	SM	new_rel	0	resp_old	0	1.45344	21.2388	2	0.715422	22.0419	0	0
3	3	stain	1	F/N	SM	old_8	0	resp_old	1	1.79998	24.4248	3	0.0637146	24.5713	0	0
3	3	grey	2	f/n	W	old_1	1	resp_old	1	1.04975	26.9985	3	0.0758041	27.1518	0	0
3	3	charred	2	f/n	W	new_rel	1	resp_new	1	2.77284	30.5052	1	0.100567	30.7295	0	0
3	3	cauliflowe	2	f/n	W	new_unrel	1	resp_new	1	3.38801	34.7018	3	0.109133	34.8903	0	0
3	3	color	2	f/n	W	new_rel	1	resp_new	1	2.70896	38.175	1	0.0206167	38.2834	1	1
3	3	thermomete	2	f/n	W	new_unrel	1	resp_new	1	0.920646	39.7827	3	0.0803915	39.9555	0	0
3	3	brown	2	f/n	W	old_7	1	resp_new	0	1.39508	41.9266	3	0.052697	42.0681	0	0
3	3	black	2	f/n	W	new_crit	1	resp_old	0	1.26601	43.9093	2	0.275664	44.2745	0	0
3	3	coal	2	f/n	W	old_6	1	resp_old	1	1.98741	46.8423	3	0.181119	47.105	0	0
3	3	frigid	3	F/n	H	old_1	1	resp_new	0	1.15478	49.9336	1	1.29637	51.3166	0	0
3	3	money	3	F/n	H	new_unrel	1	resp_new	1	5.00521	56.8947	3	0.114334	57.0978	0	0
3	3	chilly	3	F/n	H	old_6	1	resp_old	1	2.11582	59.7984	2	0.440922	60.3209	0	0
3	3	air	3	F/n	H	new_rel	1	resp_new	1	2.76438	63.6575	1	0.398487	64.1311	1	1
3	3	wet	3	F/n	H	old_12	1	resp_new	0	1.90543	66.6083	2	0.143495	66.8297	0	0
3	3	cold	3	F/n	H	new_crit	1	resp_old	0	1.64176	69.0557	3	0.146668	69.2871	0	0
3	3	dandruff	3	F/n	H	new_unrel	1	resp_new	1	4.38949	74.2577	3	0.129784	74.4784	0	0
3	3	warm	3	F/n	H	new_rel	1	resp_new	1	2.05153	77.1136	2	1.30105	78.5034	1	1
3	3	uneven	4	F/N	ROU	old_11	0	resp_old	1	1.83437	81.8477	3	0.13171	82.0713	0	0
3	3	smooth	4	F/N	ROU	old_1	0	resp_new	0	2.43245	85.0855	1	0.070527	85.2349	0	0
3	3	agent	4	F/N	ROU	new_unrel	0	resp_new	1	1.17815	86.9989	3	0.0576032	87.1482	0	0
3	3	sparrow	4	F/N	ROU	new_unrel	0	resp_new	1	2.76081	90.4935	3	0.06484	90.6371	0	0
3	3	rugged	4	F/N	ROU	new_rel	0	resp_old	0	1.74642	92.9607	2	0.475679	93.5164	0	0
3	3	tough	4	F/N	ROU	new_rel	0	resp_new	1	1.36642	95.4631	3	0.139498	95.6916	0	0
3	3	jagged	4	F/N	ROU	old_3	0	resp_old	1	0.932566	97.2123	3	0.143117	97.436	0	0
3	3	rough	4	F/N	ROU	new_crit	0	resp_new	1	1.76778	99.7883	3	0.591201	100.467	2	1
3	3	salad	5	f/n	A	old_3	1	resp_old	1	1.34272	103.416	3	0.954833	104.455	0	0
3	3	player	5	f/n	A	new_unrel	1	resp_new	1	0.956076	105.997	3	0.108772	106.191	0	0
3	3	journal	5	f/n	A	new_unrel	1	resp_new	1	0.732707	107.5	3	0.0462911	107.627	0	0
3	3	juice	5	f/n	A	old_1	1	resp_old	1	1.44257	109.651	3	0.0668233	109.802	0	0
3	3	orange	5	f/n	A	new_rel	1	resp_new	1	2.95293	113.331	1	0.405857	113.823	1	1
3	3	fruit	5	f/n	A	new_crit	1	resp_old	0	1.18428	115.586	3	0.205294	115.876	0	0
3	3	pear	5	f/n	A	new_rel	1	resp_new	1	2.4912	118.947	2	0.259765	119.284	0	0
3	3	cherry	5	f/n	A	old_10	1	resp_new	0	3.14119	123.007	2	0.412554	123.503	0	0
3	3	nose	6	F/n	NO	old_3	2	resp_old	1	1.30186	126.162	3	0.0906171	126.335	0	0
3	3	servant	6	F/n	NO	new_unrel	2	resp_new	1	0.896836	127.812	3	0.142049	128.042	0	0
3	3	perfume	6	F/n	NO	new_rel	2	resp_new	1	0.556826	129.184	3	0.0709374	129.34	0	0
3	3	barrel	6	F/n	NO	new_unrel	2	resp_new	1	0.675025	130.601	3	0.0472549	130.729	0	0
3	3	salts	6	F/n	NO	new_rel	2	resp_new	1	0.610073	131.92	3	0.00655001	132.015	0	0
3	3	breathe	6	F/n	NO	old_11	2	resp_old	1	1.33693	133.931	1	4.36577	138.387	0	0
3	3	smell	6	F/n	NO	new_crit	2	resp_new	1	4.06076	143.033	3	1.00105	144.111	3	1
3	3	fragrance	6	F/n	NO	old_1	2	resp_old	1	1.76429	146.458	1	0.424951	146.974	0	0
3	4	mouth	1	f/N	FO	old_1	0	resp_new	0	5.59118	7.04016	1	0.000506908	7.12847	0	0
3	4	yard	1	f/N	FO	old_2	0	resp_new	0	4.62096	12.3339	1	0.0117185	12.4334	1	1
3	4	hand	1	f/N	FO	old_8	0	resp_new	0	2.03369	15.0404	2	0.0294344	15.1479	0	0
3	4	ankle	1	f/N	FO	new_rel	0	resp_new	1	1.31941	17.0515	1	0.193511	17.3239	0	0
3	4	movie	1	f/N	FO	new_unrel	0	resp_new	1	1.12545	19.0264	3	0.0541728	19.1679	0	0
3	4	arm	1	f/N	FO	new_rel	0	resp_old	0	1.47163	21.2132	1	1.2075	22.5044	0	0
3	4	south	1	f/N	FO	new_unrel	0	resp_new	1	1.12539	24.2059	3	0.614079	24.9074	0	0
3	4	foot	1	f/N	FO	new_crit	0	resp_new	1	3.41487	28.9068	3	1.20139	30.1892	2	1
3	4	feelers	2	f/n	WE	old_11	1	resp_new	0	1.8111	33.6526	3	0.529687	34.269	0	0
3	4	insect	2	f/n	WE	new_rel	1	resp_new	1	1.28413	36.1364	1	0.240599	36.4627	0	0
3	4	bridge	2	f/n	WE	new_unrel	1	resp_new	1	0.774521	37.8242	3	0.161505	38.0673	0	0
3	4	poison	2	f/n	WE	old_6	1	resp_new	0	1.68321	40.331	1	1.37542	41.7925	0	0
3	4	tarantula	2	f/n	WE	old_1	1	resp_new	0	1.89983	44.2718	3	1.00614	45.3614	0	0
3	4	organ	2	f/n	WE	new_unrel	1	resp_new	1	6.14214	52.0813	2	0.57626	52.7366	0	0
3	4	spider	2	f/n	WE	new_crit	1	resp_new	1	3.51883	56.8349	3	0.117797	57.0439	3	1
3	4	arachnid	2	f/n	WE	new_rel	1	resp_new	1	1.77645	59.4017	2	0.279257	59.7738	0	0
3	4	infantry	3	f/N	AR	old_1	0	resp_old	1	1.65317	62.7743	3	0.248317	63.1103	0	0
3	4	captain	3	f/N	AR	old_4	0	resp_old	1	0.991406	64.681	3	0.203384	64.9631	0	0
3	4	military	3	f/N	AR	old_10	0	resp_old	1	0.838783	66.3833	3	0.208198	66.6802	0	0
3	4	crystal	3	f/N	AR	new_unrel	0	resp_new	1	0.826998	68.0838	3	0.120819	68.2908	0	0
3	4	freckle	3	f/N	AR	new_unrel	0	resp_new	1	0.704116	69.5732	3	0.110714	69.7646	0	0
3	4	army	3	f/N	AR	new_crit	0	resp_new	1	2.34527	72.6841	3	0.169607	72.9341	2	1
3	4	united state	3	f/N	AR	new_rel	0	resp_new	1	1.91663	75.4374	3	0.177815	75.6962	0	0
3	4	draft	3	f/N	AR	new_rel	0	resp_new	1	0.985334	77.26	3	0.0297311	77.3746	0	0
3	4	emotion	4	F/n	M	old_1	2	resp_new	0	3.38549	82.2285	1	0.290198	82.6006	1	1
3	4	hatred	4	F/n	M	old_11	2	resp_old	1	0.93769	84.1185	3	0.112688	84.3216	0	0
3	4	enrage	4	F/n	M	new_rel	2	resp_old	0	1.39525	86.3034	1	1.60892	88.0009	0	0
3	4	dinner	4	F/n	M	new_unrel	2	resp_new	1	1.05511	89.6438	3	0.0883106	89.8185	0	0
3	4	earthworm	4	F/n	M	new_unrel	2	resp_new	1	0.645626	91.0464	3	0.132648	91.2611	0	0
3	4	anger	4	F/n	M	new_crit	2	resp_new	1	2.72443	94.5664	1	0.0989841	94.7519	1	1
3	4	ire	4	F/n	M	new_rel	2	resp_new	1	1.11408	96.4377	3	0.0523222	96.5744	0	0
3	4	fight	4	F/n	M	old_2	2	resp_old	1	1.48346	98.6334	3	0.0730476	98.7926	0	0
3	4	sleeves	5	f/N	SHI	old_10	0	resp_old	1	1.53551	101.725	3	0.152991	101.969	0	0
3	4	voltage	5	f/N	SHI	new_unrel	0	resp_new	1	0.656362	103.214	3	0.105657	103.406	0	0
3	4	vest	5	f/N	SHI	old_5	0	resp_new	0	0.832281	104.817	3	0.298967	105.197	0	0
3	4	pants	5	f/N	SHI	new_rel	0	resp_old	0	3.00668	108.789	2	0.148787	109.028	0	0
3	4	piano	5	f/N	SHI	new_unrel	0	resp_new	1	1.00813	110.615	3	0.0763539	110.782	0	0
3	4	shirt	5	f/N	SHI	new_crit	0	resp_new	1	2.35315	113.715	3	0.134842	113.936	3	1
3	4	blouse	5	f/N	SHI	new_rel	0	resp_new	1	1.25477	115.77	3	0.15467	116.011	0	0
3	4	belt	5	f/N	SHI	old_1	0	resp_old	1	0.77427	117.373	3	0.13786	117.592	0	0
3	4	sweep	6	F/N	T	old_7	0	resp_new	0	6.13732	125.104	1	0.322365	125.511	1	1
3	4	landfill	6	F/N	T	old_1	0	resp_new	0	1.74123	127.828	2	0.408012	128.322	0	0
3	4	pony	6	F/N	T	new_unrel	0	resp_new	1	2.28626	131.184	3	0.159815	131.427	0	0
3	4	can	6	F/N	T	old_4	0	resp_new	0	0.990394	132.999	3	0.15263	133.231	0	0
3	4	scholar	6	F/N	T	new_unrel	0	resp_new	1	5.7199	139.526	3	0.164432	139.778	0	0
3	4	litter	6	F/N	T	new_rel	0	resp_new	1	0.920779	141.277	3	0.22372	141.578	0	0
3	4	trash	6	F/N	T	new_crit	0	resp_new	1	2.76605	144.92	3	0.0176824	145.025	3	1
3	4	garbage	6	F/N	T	new_rel	0	resp_new	1	4.14772	149.755	2	0.420658	150.265	2	1
4	1	slice	1	f/N	BR	old_7	0	resp_old	1	57.5154	63.7803	3	2.68204	66.5513	0	0
4	1	loaf	1	f/N	BR	new_rel	0	resp_new	1	7.47368	74.6163	3	1.43772	76.1402	0	0
4	1	model	1	f/N	BR	new_unrel	0	resp_new	1	4.71207	81.4281	3	1.40306	82.9117	0	0
4	1	judge	1	f/N	BR	new_unrel	0	resp_old	0	1.89883	85.3857	3	0.556382	86.0215	0	0
4	1	eat	1	f/N	BR	old_3	0	resp_old	1	2.12169	88.7173	3	0.376762	89.1743	0	0
4	1	bread	1	f/N	BR	new_crit	0	resp_new	1	10.5497	100.301	3	2.07793	102.462	2	1
4	1	butter	1	f/N	BR	old_1	0	resp_old	1	3.88029	106.926	3	1.26959	108.284	0	0
4	1	sandwich	1	f/N	BR	new_rel	0	resp_new	1	2.09806	110.961	3	0.540758	111.582	0	0
4	1	pride	2	f/N	L	old_2	0	resp_new	0	8.69569	123.034	2	1.2874	124.398	2	1
4	1	tamer	2	f/N	L	old_1	0	resp_old	1	2.40874	127.392	3	1.33936	128.807	0	0
4	1	cub	2	f/N	L	new_rel	0	resp_new	1	1.15485	130.542	3	0.844123	131.468	0	0
4	1	jungle	2	f/N	L	old_11	0	resp_old	1	1.60618	133.655	3	0.880412	134.613	0	0
4	1	cousin	2	f/N	L	new_unrel	0	resp_old	0	2.19807	137.391	3	0.488214	137.965	0	0
4	1	number	2	f/N	L	new_unrel	0	resp_new	1	2.16292	140.712	3	0.633617	141.431	0	0
4	1	roar	2	f/N	L	new_rel	0	resp_new	1	5.5438	147.554	3	1.19753	148.837	1	1
4	1	lion	2	f/N	L	new_crit	0	resp_new	1	1.78217	151.199	3	0.793808	152.072	0	0
4	1	ready	3	F/N	ROU	old_1	0	resp_old	1	2.35655	156.366	3	0.888894	157.336	0	0
4	1	ground	3	F/N	ROU	old_10	0	resp_old	1	1.43585	159.355	3	0.265488	159.704	0	0
4	1	agent	3	F/N	ROU	new_unrel	0	resp_new	1	2.50313	162.789	3	0.193739	163.07	0	0
4	1	sand	3	F/N	ROU	new_rel	0	resp_old	0	1.60671	165.26	3	0.309303	165.647	0	0
4	1	sparrow	3	F/N	ROU	new_unrel	0	resp_new	1	8.6795	174.912	3	1.74231	176.737	3	1
4	1	rough	3	F/N	ROU	new_crit	0	resp_old	0	2.01674	179.331	3	0.807467	180.218	0	0
4	1	uneven	3	F/N	ROU	old_6	0	resp_new	0	1.80007	182.599	3	0.349546	183.032	0	0
4	1	coarse	3	F/N	ROU	new_rel	0	resp_old	0	2.10433	185.717	3	0.251081	186.054	0	0
4	1	rest	4	F/N	SLE	old_3	0	resp_old	1	1.77052	189.328	3	0.467724	189.874	0	0
4	1	wake	4	F/N	SLE	old_11	0	resp_new	0	5.12864	195.583	3	3.30473	198.976	2	1
4	1	rectangle	4	F/N	SLE	new_unrel	0	resp_new	1	1.92267	201.48	3	0.664083	202.223	0	0
4	1	awake	4	F/N	SLE	new_rel	0	resp_new	1	1.51779	204.325	3	0.312861	204.721	0	0
4	1	shark	4	F/N	SLE	new_unrel	0	resp_new	1	1.20732	206.511	3	0.249916	206.849	0	0
4	1	sleep	4	F/N	SLE	new_crit	0	resp_new	1	1.78152	209.204	3	0.252055	209.535	0	0
4	1	yawn	4	F/N	SLE	new_rel	0	resp_new	1	1.27181	211.391	3	0.210603	211.684	0	0
4	1	nap	4	F/N	SLE	old_1	0	resp_old	1	1.75896	214.022	3	0.278457	214.378	0	0
4	1	captain	5	f/N	AR	old_1	0	resp_old	1	1.93475	217.765	3	0.631165	218.475	0	0
4	1	freckle	5	f/N	AR	new_unrel	0	resp_new	1	5.14971	224.207	1	2.35926	226.645	2	1
4	1	united state	5	f/N	AR	new_rel	0	resp_new	1	3.57528	230.804	3	0.739339	231.631	0	0
4	1	marines	5	f/N	AR	old_4	0	resp_old	1	2.81368	235.024	3	0.308551	235.415	0	0
4	1	march	5	f/N	AR	new_rel	0	resp_new	1	1.31347	237.303	3	0.739387	238.131	0	0
4	1	crystal	5	f/N	AR	new_unrel	0	resp_old	0	1.56544	240.276	1	0.494069	240.853	0	0
4	1	uniform	5	f/N	AR	old_10	0	resp_new	0	2.55586	243.986	2	1.12437	245.192	0	0
4	1	army	5	f/N	AR	new_crit	0	resp_new	1	4.55936	250.335	3	0.281203	250.696	0	0
4	1	reign	6	f/n	QU	old_10	1	resp_old	1	3.31137	255.752	3	0.968965	256.801	0	0
4	1	palace	6	f/n	QU	new_rel	1	resp_new	1	1.70613	259.08	3	0.760051	259.924	0	0
4	1	yellow	6	f/n	QU	new_unrel	1	resp_new	1	0.914996	261.421	3	0.180721	261.688	0	0
4	1	crown	6	f/n	QU	new_rel	1	resp_old	0	1.22512	263.498	2	0.371261	263.951	0	0
4	1	rule	6	f/n	QU	old_1	1	resp_old	1	2.122	266.656	2	1.98967	268.725	0	0
4	1	queen	6	f/n	QU	old_6	1	resp_new	0	1.73549	271.038	3	0.346144	271.462	0	0
4	1	oven	6	f/n	QU	new_unrel	1	resp_new	1	2.99539	275.03	1	0.875254	275.983	0	0
4	1	king	6	f/n	QU	new_crit	1	resp_new	1	1.31882	277.875	3	0.376582	278.334	0	0
4	2	skin	1	F/N	SO	old_5	0	resp_new	0	2.61442	4.76738	3	0.736278	5.5858	0	0
4	2	downy	1	F/N	SO	old_1	0	resp_old	1	1.26053	7.42888	3	0.288266	7.79902	0	0
4	2	furry	1	F/N	SO	new_rel	0	resp_new	1	4.77518	13.1573	3	3.00521	16.2388	1	1
4	2	tender	1	F/N	SO	old_11	0	resp_old	1	1.57721	18.3905	3	0.300697	18.7743	0	0
4	2	canal	1	F/N	SO	new_unrel	0	resp_new	1	4.34315	23.6999	2	1.50075	25.2851	0	0
4	2	soft	1	F/N	SO	new_crit	0	resp_old	0	1.33676	27.2053	3	0.260637	27.5423	0	0
4	2	fluffy	1	F/N	SO	new_rel	0	resp_old	0	1.42493	29.5426	3	0.279027	29.904	0	0
4	2	rattlesnak	1	F/N	SO	new_unrel	0	resp_new	1	2.16307	32.6476	3	0.257865	32.9915	0	0
4	2	tart	2	F/n	HON	old_12	1	resp_new	0	6.07485	40.5277	3	3.26445	43.8758	2	1
4	2	soda	2	F/n	HON	old_3	1	resp_old	1	1.7288	46.179	3	0.238633	46.5022	0	0
4	2	alligator	2	F/n	HON	new_unrel	1	resp_new	1	1.48309	48.5709	3	0.24216	48.8961	0	0
4	2	tooth	2	F/n	HON	new_rel	1	resp_new	1	1.16131	50.6396	3	0.211018	50.9375	0	0
4	2	city	2	F/n	HON	new_unrel	1	resp_new	1	1.01416	52.5296	3	0.212994	52.8235	0	0
4	2	chocolate	2	F/n	HON	old_1	1	resp_old	1	1.03187	54.4439	3	0.23062	54.7613	0	0
4	2	good	2	F/n	HON	new_rel	1	resp_new	1	1.4712	56.8144	3	0.49491	57.3917	0	0
4	2	sweet	2	F/n	HON	new_crit	1	resp_old	0	1.2898	59.2581	3	0.256821	59.6029	0	0
4	2	wave	3	f/n	BA	old_1	1	resp_old	1	1.79378	63.3889	3	0.24349	63.7109	0	0
4	2	checkered	3	f/n	BA	old_9	1	resp_new	0	1.75849	66.0502	3	0.233047	66.3617	0	0
4	2	beach	3	f/n	BA	new_unrel	1	resp_new	1	1.01459	67.9557	3	0.184111	68.2204	0	0
4	2	freedom	3	f/n	BA	new_rel	1	resp_new	1	0.985407	69.7871	3	0.193148	70.0664	0	0
4	2	penalty	3	f/n	BA	new_unrel	1	resp_new	1	3.79657	74.447	3	0.551368	75.0877	2	1
4	2	flag	3	f/n	BA	new_crit	1	resp_new	1	2.80138	78.4681	3	0.450628	79.0023	0	0
4	2	sign	3	f/n	BA	new_rel	1	resp_new	1	1.5359	81.1121	3	0.159971	81.3494	0	0
4	2	emblem	3	f/n	BA	old_5	1	resp_new	0	0.949656	82.8809	3	0.259122	83.2266	0	0
4	2	scraps	4	F/N	T	old_9	0	resp_new	0	9.57037	94.1746	2	0.589406	94.8495	0	0
4	2	sweep	4	F/N	T	new_rel	0	resp_old	0	1.93497	97.3608	2	0.698654	98.1381	0	0
4	2	pony	4	F/N	T	new_unrel	0	resp_new	1	1.49466	100.206	3	0.239014	100.528	0	0
4	2	dump	4	F/N	T	old_3	0	resp_old	1	1.02643	102.128	3	0.260349	102.469	0	0
4	2	scholar	4	F/N	T	new_unrel	0	resp_new	1	2.30957	105.354	3	0.226785	105.662	0	0
4	2	litter	4	F/N	T	new_rel	0	resp_new	1	1.42446	107.66	3	0.149611	107.893	0	0
4	2	trash	4	F/N	T	new_crit	0	resp_new	1	2.6613	111.134	3	0.230129	111.447	0	0
4	2	rubbish	4	F/N	T	old_1	0	resp_old	1	2.12807	114.157	3	0.484927	114.728	0	0
4	2	plastic	5	F/N	CU	old_7	0	resp_old	1	1.3716	117.487	3	0.263024	117.838	0	0
4	2	lid	5	F/N	CU	old_5	0	resp_old	1	0.908691	119.32	3	0.26147	119.662	0	0
4	2	bullet	5	F/N	CU	new_unrel	0	resp_new	1	1.1727	121.409	3	0.248724	121.745	0	0
4	2	measuring	5	F/N	CU	new_rel	0	resp_new	1	1.45988	123.781	3	0.710391	124.574	0	0
4	2	fabric	5	F/N	CU	new_unrel	0	resp_new	1	1.63526	126.782	3	0.225626	127.092	0	0
4	2	saucer	5	F/N	CU	new_rel	0	resp_new	1	1.65284	129.32	3	0.223597	129.621	0	0
4	2	sip	5	F/N	CU	old_1	0	resp_new	0	1.06673	131.265	2	7.26346	138.616	1	1
4	2	cup	5	F/N	CU	new_crit	0	resp_new	1	5.74333	144.938	3	1.60416	146.628	0	0
4	2	creepy	6	f/n	WE	old_9	1	resp_old	1	1.57699	149.721	3	0.495813	150.3	0	0
4	2	animal	6	f/n	WE	new_rel	1	resp_new	1	1.09057	151.967	3	0.163966	152.218	0	0
4	2	bridge	6	f/n	WE	new_unrel	1	resp_new	1	3.75685	156.552	3	0.995367	157.63	0	0
4	2	web	6	f/n	WE	old_4	1	resp_old	1	1.77038	159.983	3	0.242933	160.304	0	0
4	2	organ	6	f/n	WE	new_unrel	1	resp_new	1	1.30686	162.193	3	0.209372	162.485	0	0
4	2	poison	6	f/n	WE	old_1	1	resp_new	0	4.683	167.747	2	1.39443	169.227	2	1
4	2	spider	6	f/n	WE	new_crit	1	resp_new	1	1.43606	171.247	3	0.731613	172.062	0	0
4	2	bug	6	f/n	WE	new_rel	1	resp_new	1	3.00713	175.644	3	0.259871	175.982	0	0
4	3	charred	1	f/n	W	old_1	1	resp_old	1	4.54857	6.55484	1	0.458935	7.09294	0	0
4	3	thermomete	1	f/n	W	new_unrel	1	resp_new	1	1.74642	9.41665	3	0.464234	9.95965	0	0
4	3	cauliflowe	1	f/n	W	new_unrel	1	resp_old	0	2.22719	12.7706	1	0.469059	13.3205	0	0
4	3	coal	1	f/n	W	new_rel	1	resp_new	1	1.37175	15.2712	3	0.364649	15.7124	0	0
4	3	death	1	f/n	W	old_11	1	resp_old	1	1.63003	17.9198	3	0.354264	18.3515	0	0
4	3	black	1	f/n	W	new_crit	1	resp_new	1	3.02423	21.9517	3	0.600141	22.6364	0	0
4	3	night	1	f/n	W	old_5	1	resp_old	1	1.91639	25.1309	3	0.996753	26.2131	0	0
4	3	blue	1	f/n	W	new_rel	1	resp_new	1	1.37721	28.1714	3	1.15157	29.406	0	0
4	3	table	2	F/n	TA	old_1	1	resp_old	1	0.97959	31.9415	3	0.249895	32.2716	0	0
4	3	sitting	2	F/n	TA	old_7	1	resp_old	1	1.23783	34.0838	3	0.211584	34.3765	0	0
4	3	rocking	2	F/n	TA	new_rel	1	resp_new	1	4.82098	39.7748	2	0.756468	40.6089	2	1
4	3	sofa	2	F/n	TA	new_rel	1	resp_new	1	2.84833	44.0313	3	0.728824	44.8439	0	0
4	3	poem	2	F/n	TA	new_unrel	1	resp_old	0	4.91678	50.3389	2	0.769815	51.1847	0	0
4	3	chair	2	F/n	TA	new_crit	1	resp_new	1	1.79419	53.5516	3	2.21408	55.8437	0	0
4	3	helmet	2	F/n	TA	new_unrel	1	resp_new	1	1.51843	57.9388	3	0.287049	58.3089	0	0
4	3	sit	2	F/n	TA	old_6	1	resp_old	1	1.06739	59.9488	3	0.207287	60.231	0	0
4	3	apple	3	f/n	A	old_5	1	resp_old	1	1.79946	63.507	3	0.71822	64.3098	0	0
4	3	bowl	3	f/n	A	new_rel	1	resp_new	1	3.51638	68.4032	2	1.11344	69.6036	0	0
4	3	journal	3	f/n	A	new_unrel	1	resp_new	1	2.59133	72.7771	3	0.447489	73.3063	0	0
4	3	kiwi	3	f/n	A	old_11	1	resp_old	1	1.31883	75.2021	2	5.22894	80.5135	0	0
4	3	player	3	f/n	A	new_unrel	1	resp_new	1	1.46602	82.5558	3	0.336571	82.969	0	0
4	3	salad	3	f/n	A	new_rel	1	resp_new	1	1.61183	85.1627	3	0.173966	85.4205	0	0
4	3	cocktail	3	f/n	A	old_1	1	resp_old	1	1.06125	87.0614	3	0.236429	87.3788	0	0
4	3	fruit	3	f/n	A	new_crit	1	resp_new	1	1.32467	89.2795	3	0.252495	89.6086	0	0
4	3	arm	4	f/N	FO	old_6	0	resp_new	0	14.8509	106.221	2	0.625828	106.927	0	0
4	3	knee	4	f/N	FO	old_11	0	resp_old	1	1.34206	108.844	3	0.244394	109.171	0	0
4	3	toe	4	f/N	FO	new_rel	0	resp_new	1	1.07893	110.83	3	0.219494	111.136	0	0
4	3	boot	4	f/N	FO	old_1	0	resp_old	1	1.54219	113.26	3	1.05404	114.397	0	0
4	3	movie	4	f/N	FO	new_unrel	0	resp_new	1	5.75146	120.731	2	0.744057	121.564	2	1
4	3	foot	4	f/N	FO	new_crit	0	resp_old	0	4.19623	126.335	2	2.50026	128.914	1	1
4	3	ankle	4	f/N	FO	new_rel	0	resp_new	1	1.61763	131.116	3	0.471269	131.665	0	0
4	3	south	4	f/N	FO	new_unrel	0	resp_new	1	1.33627	133.578	3	0.290424	133.946	0	0
4	3	temper	5	F/n	M	old_10	1	resp_old	1	1.5004	137.299	3	0.928477	138.305	0	0
4	3	dinner	5	F/n	M	new_unrel	1	resp_new	1	0.967392	139.851	3	0.281706	140.213	0	0
4	3	fight	5	F/n	M	old_1	1	resp_new	0	0.967313	141.758	3	0.244502	142.084	0	0
4	3	mean	5	F/n	M	old_2	1	resp_new	0	0.826879	143.49	3	0.265732	143.836	0	0
4	3	hatred	5	F/n	M	new_rel	1	resp_old	0	4.65021	149.068	1	0.78201	149.934	1	1
4	3	anger	5	F/n	M	new_crit	1	resp_new	1	1.5356	152.054	3	0.329406	152.461	0	0
4	3	earthworm	5	F/n	M	new_unrel	1	resp_new	1	1.89873	154.936	3	0.240779	155.257	0	0
4	3	rage	5	F/n	M	new_rel	1	resp_new	1	3.80983	159.65	1	0.409303	160.135	0	0
4	3	whiff	6	F/n	NO	old_1	2	resp_old	1	1.4247	163.141	3	0.248466	163.472	0	0
4	3	aroma	6	F/n	NO	new_rel	2	resp_new	1	1.92267	165.97	3	0.419912	166.469	0	0
4	3	barrel	6	F/n	NO	new_unrel	2	resp_new	1	0.855789	167.906	3	0.293658	168.286	0	0
4	3	hear	6	F/n	NO	new_rel	2	resp_new	1	0.955775	169.819	3	0.21441	170.114	0	0
4	3	servant	6	F/n	NO	new_unrel	2	resp_new	1	0.70408	171.393	3	0.191485	171.669	0	0
4	3	scent	6	F/n	NO	old_3	2	resp_old	1	1.66474	173.908	3	0.207225	174.193	0	0
4	3	nose	6	F/n	NO	old_7	2	resp_old	1	2.95395	177.729	3	0.228395	178.041	0	0
4	3	smell	6	F/n	NO	new_crit	2	resp_new	1	0.767719	179.393	3	0.223607	179.697	0	0
4	4	race	1	f/N	C	old_4	0	resp_new	0	2.92462	4.7712	3	0.442211	5.29076	0	0
4	4	Ford	1	f/N	C	old_9	0	resp_old	1	1.66521	7.53819	3	0.262306	7.87805	0	0
4	4	partner	1	f/N	C	new_unrel	0	resp_new	1	1.11993	9.57172	3	0.223624	9.87652	0	0
4	4	taxi	1	f/N	C	new_rel	0	resp_new	1	0.949456	11.4031	3	0.21888	11.7087	0	0
4	4	jeep	1	f/N	C	new_rel	0	resp_new	1	0.820951	13.1115	3	0.234377	13.4317	0	0
4	4	car	1	f/N	C	new_crit	0	resp_new	1	0.972942	14.9827	3	0.253909	15.3118	0	0
4	4	moisture	1	f/N	C	new_unrel	0	resp_new	1	1.23671	17.1306	3	0.244976	17.4577	0	0
4	4	sedan	1	f/N	C	old_1	0	resp_old	1	1.03819	19.0752	3	0.225192	19.3808	0	0
4	4	ice	2	F/n	H	old_11	1	resp_old	1	0.996306	21.9418	3	0.940503	22.9576	0	0
4	4	shiver	2	F/n	H	old_3	1	resp_old	1	1.17862	24.7147	3	0.236044	25.0321	0	0
4	4	dandruff	2	F/n	H	new_unrel	1	resp_new	1	4.65691	30.2655	2	1.28944	31.6435	2	1
4	4	winter	2	F/n	H	new_rel	1	resp_new	1	4.43067	36.657	3	0.163848	36.9001	0	0
4	4	money	2	F/n	H	new_unrel	1	resp_new	1	0.803131	38.2813	3	0.155308	38.5166	0	0
4	4	chilly	2	F/n	H	new_rel	1	resp_new	1	1.03784	40.1292	3	0.220934	40.431	0	0
4	4	cold	2	F/n	H	new_crit	1	resp_new	1	3.21187	44.2226	2	1.49601	45.8039	1	1
4	4	wet	2	F/n	H	old_1	1	resp_old	1	1.98181	48.3622	3	0.228521	48.6696	0	0
4	4	puff	3	F/N	SM	old_2	0	resp_old	1	6.32956	56.5605	2	3.82569	60.4624	1	1
4	4	tobacco	3	F/N	SM	new_rel	0	resp_new	1	1.69456	62.7353	3	0.227014	63.0458	0	0
4	4	lungs	3	F/N	SM	old_1	0	resp_old	1	2.48535	66.1049	2	1.39124	67.5778	1	1
4	4	jewel	3	F/N	SM	new_unrel	0	resp_old	0	1.9105	70.0635	1	1.82306	71.9661	0	0
4	4	mathematic	3	F/N	SM	new_unrel	0	resp_new	1	1.76406	74.3093	3	0.507173	74.9012	0	0
4	4	stink	3	F/N	SM	old_9	0	resp_new	0	1.04913	76.5265	3	0.147195	76.755	0	0
4	4	pollution	3	F/N	SM	new_rel	0	resp_new	1	0.820707	78.1586	3	0.17766	78.4222	0	0
4	4	smoke	3	F/N	SM	new_crit	0	resp_new	1	1.03177	80.03	3	0.173832	80.2907	0	0
4	4	vest	4	f/N	SHI	old_1	0	resp_old	1	1.01985	82.7853	3	0.208861	83.0812	0	0
4	4	linen	4	f/N	SHI	new_rel	0	resp_new	1	1.16633	84.8276	3	0.149409	85.0589	0	0
4	4	piano	4	f/N	SHI	new_unrel	0	resp_new	1	0.780218	86.4197	3	0.158873	86.658	0	0
4	4	sleeves	4	f/N	SHI	old_3	0	resp_old	1	1.63508	88.876	3	0.185392	89.1456	0	0
4	4	pocket	4	f/N	SHI	new_rel	0	resp_new	1	0.949581	90.6752	3	0.168285	90.9301	0	0
4	4	shirt	4	f/N	SHI	new_crit	0	resp_new	1	0.9794	92.4831	3	0.177734	92.742	0	0
4	4	pants	4	f/N	SHI	old_7	0	resp_old	1	1.30137	94.6192	3	0.232065	94.9395	0	0
4	4	voltage	4	f/N	SHI	new_unrel	0	resp_new	1	0.961846	96.4809	3	0.154911	96.722	0	0
4	4	female	5	f/n	BO	old_5	1	resp_new	0	7.17118	105.304	3	1.86799	107.255	3	1
4	4	schools	5	f/n	BO	new_unrel	1	resp_new	1	1.51869	109.355	2	1.21133	110.649	0	0
4	4	sister	5	f/n	BO	new_rel	1	resp_new	1	1.33099	112.558	3	0.156221	112.797	0	0
4	4	pretty	5	f/n	BO	new_rel	1	resp_new	1	1.16083	114.531	3	0.244674	114.863	0	0
4	4	dress	5	f/n	BO	old_8	1	resp_old	1	1.96966	117.413	3	0.233263	117.725	0	0
4	4	boy	5	f/n	BO	old_1	1	resp_old	1	1.6643	119.969	3	0.243904	120.291	0	0
4	4	girl	5	f/n	BO	new_crit	1	resp_old	0	2.87819	123.75	3	1.01736	124.844	0	0
4	4	episode	5	f/n	BO	new_unrel	1	resp_new	1	0.779598	126.208	3	0.145426	126.434	0	0
4	4	sash	6	F/n	D	old_11	1	resp_old	1	1.14343	128.951	3	0.239103	129.271	0	0
4	4	house	6	F/n	D	old_3	1	resp_old	1	1.07827	130.923	3	0.287747	131.286	0	0
4	4	view	6	F/n	D	old_1	1	resp_new	0	2.74978	134.619	1	1.15038	135.846	1	1
4	4	breeze	6	F/n	D	new_rel	1	resp_new	1	1.43051	137.857	3	0.153766	138.088	0	0
4	4	pane	6	F/n	D	new_rel	1	resp_new	1	1.35464	140.019	3	0.156339	140.257	0	0
4	4	chapter	6	F/n	D	new_unrel	1	resp_new	1	1.1375	141.968	3	0.123778	142.179	0	0
4	4	window	6	F/n	D	new_crit	1	resp_new	1	1.80537	144.567	3	0.138086	144.784	0	0
4	4	mayor	6	F/n	D	new_unrel	1	resp_new	1	0.843889	146.208	3	0.259342	146.554	0	0
5	1	grey	1	f/n	W	old_11	1	resp_old	1	10.1711	19.6644	2	5.35945	25.1127	0	0
5	1	charred	1	f/n	W	old_1	1	resp_new	0	6.86117	32.5575	3	4.82601	37.465	0	0
5	1	white	1	f/n	W	old_3	1	resp_old	1	2.79631	40.8455	3	2.07945	43.007	0	0
5	1	brown	1	f/n	W	new_rel	1	resp_old	0	6.01899	49.6117	2	1.57723	51.2731	0	0
5	1	cauliflowe	1	f/n	W	new_unrel	1	resp_new	1	3.29427	55.1489	3	1.58656	56.8259	0	0
5	1	dark	1	f/n	W	new_rel	1	resp_new	1	3.74503	61.1431	2	1.11307	62.3357	0	0
5	1	thermomete	1	f/n	W	new_unrel	1	resp_new	1	3.96261	66.8775	2	1.23408	68.2	0	0
5	1	black	1	f/n	W	new_crit	1	resp_new	1	6.62822	75.4064	1	0.845774	76.3401	0	0
5	1	sister	2	f/n	BO	old_1	1	resp_old	1	7.59017	87.2289	2	1.41192	88.7262	0	0
5	1	daughter	2	f/n	BO	old_5	1	resp_old	1	3.02523	92.3383	3	0.844239	93.3022	0	0
5	1	schools	2	f/n	BO	new_unrel	1	resp_new	1	2.53253	96.4163	3	1.18235	97.678	0	0
5	1	beautiful	2	f/n	BO	new_rel	1	resp_new	1	3.43487	101.69	3	1.13971	102.912	0	0
5	1	hair	2	f/n	BO	new_rel	1	resp_new	1	4.46659	107.958	2	0.986147	109.022	0	0
5	1	episode	2	f/n	BO	new_unrel	1	resp_new	1	1.87027	111.478	2	0.820686	112.388	0	0
5	1	girl	2	f/n	BO	new_crit	1	resp_old	0	6.75782	119.724	1	1.21001	121.012	0	0
5	1	date	2	f/n	BO	old_9	1	resp_new	0	2.74339	124.331	2	1.58754	126	0	0
5	1	weather	3	F/n	H	old_2	2	resp_old	1	2.97748	132.654	3	1.71755	134.459	0	0
5	1	warm	3	F/n	H	old_1	2	resp_new	0	5.69073	140.738	1	1.00582	141.823	0	0
5	1	arctic	3	F/n	H	new_rel	2	resp_new	1	2.57303	144.976	1	0.73284	145.787	0	0
5	1	freeze	3	F/n	H	new_rel	2	resp_old	0	3.58689	149.947	2	1.03186	151.057	0	0
5	1	dandruff	3	F/n	H	new_unrel	2	resp_new	1	2.7033	154.341	3	1.29344	155.716	0	0
5	1	money	3	F/n	H	new_unrel	2	resp_new	1	1.88778	158.189	3	0.873592	159.147	0	0
5	1	cold	3	F/n	H	new_crit	2	resp_old	0	11.5864	171.312	2	1.30781	172.707	0	0
5	1	frigid	3	F/n	H	old_9	2	resp_old	1	2.71431	176.007	3	1.0274	177.118	0	0
5	1	war	4	f/N	AR	old_7	0	resp_old	1	2.70761	182.395	3	0.792762	183.266	0	0
5	1	united state	4	f/N	AR	old_5	0	resp_old	1	2.49112	186.337	3	0.739687	187.157	0	0
5	1	combat	4	f/N	AR	old_1	0	resp_old	1	1.88774	189.624	3	0.80321	190.512	0	0
5	1	air force	4	f/N	AR	new_rel	0	resp_new	1	2.0049	193.1	2	0.692109	193.879	0	0
5	1	freckle	4	f/N	AR	new_unrel	0	resp_new	1	1.82968	196.296	3	0.660587	197.046	0	0
5	1	army	4	f/N	AR	new_crit	0	resp_new	1	7.13856	204.763	3	0.755383	205.602	0	0
5	1	march	4	f/N	AR	new_rel	0	resp_new	1	2.73169	208.911	2	1.65753	210.649	0	0
5	1	crystal	4	f/N	AR	new_unrel	0	resp_new	1	1.55339	212.783	3	0.850632	213.719	0	0
5	1	glass	5	F/n	D	old_3	1	resp_old	1	3.34669	219.294	1	0.892815	220.265	0	0
5	1	house	5	F/n	D	old_1	1	resp_old	1	2.98369	223.835	2	1.09083	225.007	0	0
5	1	mayor	5	F/n	D	new_unrel	1	resp_new	1	1.68827	227.27	3	0.826241	228.18	0	0
5	1	chapter	5	F/n	D	new_unrel	1	resp_new	1	1.92851	230.682	3	0.642011	231.407	0	0
5	1	shutter	5	F/n	D	new_rel	1	resp_new	1	1.50632	233.497	2	0.955833	234.533	0	0
5	1	window	5	F/n	D	new_crit	1	resp_old	0	2.12802	237.237	1	0.990335	238.312	0	0
5	1	open	5	F/n	D	new_rel	1	resp_new	1	3.33468	242.229	2	1.20571	243.511	0	0
5	1	curtain	5	F/n	D	old_11	1	resp_new	0	1.41853	245.509	1	2.77453	248.371	0	0
5	1	blaze	6	F/N	SM	old_5	0	resp_old	1	3.59876	254.379	2	0.664167	255.122	0	0
5	1	cigar	6	F/N	SM	new_rel	0	resp_new	1	2.51464	258.212	3	1.20803	259.504	0	0
5	1	pollution	6	F/N	SM	new_rel	0	resp_new	1	1.51265	261.594	3	0.504447	262.185	0	0
5	1	pipe	6	F/N	SM	old_1	0	resp_old	1	1.60616	264.366	3	0.555483	265.008	0	0
5	1	jewel	6	F/N	SM	new_unrel	0	resp_old	0	2.2505	267.836	1	0.581672	268.499	0	0
5	1	tobacco	6	F/N	SM	old_11	0	resp_old	1	2.09277	271.169	3	0.602433	271.851	0	0
5	1	smoke	6	F/N	SM	new_crit	0	resp_old	0	9.36579	281.8	3	1.66497	283.548	0	0
5	1	mathematic	6	F/N	SM	new_unrel	0	resp_new	1	3.0191	287.154	3	1.35385	288.593	0	0
5	2	sleeves	1	f/N	SHI	old_4	0	resp_old	1	3.81591	6.28341	3	1.08064	7.45256	0	0
5	2	button	1	f/N	SHI	new_rel	0	resp_new	1	4.72358	12.7612	2	1.40344	14.2516	0	0
5	2	piano	1	f/N	SHI	new_unrel	0	resp_old	0	1.55897	16.3927	1	2.81199	19.2848	0	0
5	2	voltage	1	f/N	SHI	new_unrel	0	resp_new	1	2.15682	22.0276	3	0.374072	22.4836	0	0
5	2	vest	1	f/N	SHI	new_rel	0	resp_new	1	1.23726	24.3063	3	0.420026	24.8083	0	0
5	2	linen	1	f/N	SHI	old_10	0	resp_old	1	1.29011	26.6778	3	0.419575	27.1798	0	0
5	2	cuffs	1	f/N	SHI	old_1	0	resp_old	1	1.00251	28.7621	3	0.303042	29.1421	0	0
5	2	shirt	1	f/N	SHI	new_crit	0	resp_new	1	3.35888	33.0774	3	2.40953	35.5661	0	0
5	2	tamer	2	f/N	L	old_1	0	resp_old	1	2.55561	41.0691	3	0.352717	41.5047	0	0
5	2	cage	2	f/N	L	old_11	0	resp_old	1	1.04916	43.1339	3	0.489165	43.7066	0	0
5	2	number	2	f/N	L	new_unrel	0	resp_new	1	3.46451	47.748	2	0.393588	48.2217	0	0
5	2	fierce	2	f/N	L	old_3	0	resp_old	1	1.51208	50.313	3	0.359304	50.7593	0	0
5	2	mane	2	f/N	L	new_rel	0	resp_new	1	2.45642	53.7892	1	0.477306	54.342	0	0
5	2	lion	2	f/N	L	new_crit	0	resp_new	1	2.9077	57.8251	3	0.765617	58.6679	0	0
5	2	cousin	2	f/N	L	new_unrel	0	resp_new	1	2.94874	62.197	2	0.582082	62.8552	0	0
5	2	jungle	2	f/N	L	new_rel	0	resp_new	1	1.03764	64.4701	3	0.56455	65.1164	0	0
5	2	landfill	3	F/N	T	old_1	0	resp_old	1	1.67724	68.5877	3	0.437871	69.1074	0	0
5	2	sweep	3	F/N	T	new_rel	0	resp_new	1	3.62222	73.3044	1	0.314389	73.7019	0	0
5	2	waste	3	F/N	T	old_4	0	resp_old	1	2.9166	77.197	3	0.634992	77.9136	0	0
5	2	pony	3	F/N	T	new_unrel	0	resp_new	1	3.24124	81.7318	3	1.27103	83.0796	0	0
5	2	rubbish	3	F/N	T	new_rel	0	resp_new	1	2.01693	85.6778	3	0.72213	86.4885	0	0
5	2	trash	3	F/N	T	new_crit	0	resp_new	1	2.67271	89.745	3	0.305911	90.1366	0	0
5	2	pile	3	F/N	T	old_12	0	resp_old	1	1.16701	91.8772	3	0.520913	92.4837	0	0
5	2	scholar	3	F/N	T	new_unrel	0	resp_new	1	1.59501	94.6638	3	0.638839	95.3867	0	0
5	2	bed	4	F/N	SLE	old_10	0	resp_old	1	1.77056	98.8237	3	0.332391	99.2378	0	0
5	2	drowsy	4	F/N	SLE	old_1	0	resp_old	1	1.29025	101.115	3	0.278087	101.476	0	0
5	2	blanket	4	F/N	SLE	new_rel	0	resp_new	1	3.55789	105.608	1	0.548938	106.237	0	0
5	2	dream	4	F/N	SLE	new_rel	0	resp_new	1	2.8379	109.659	2	0.298423	110.038	0	0
5	2	rectangle	4	F/N	SLE	new_unrel	0	resp_new	1	1.47698	112.096	3	0.795924	112.974	0	0
5	2	shark	4	F/N	SLE	new_unrel	0	resp_old	0	4.06783	117.618	1	0.286201	117.994	0	0
5	2	sleep	4	F/N	SLE	new_crit	0	resp_new	1	3.07114	121.645	3	0.28797	122.02	0	0
5	2	awake	4	F/N	SLE	old_5	0	resp_old	1	2.70186	125.3	3	0.390352	125.774	0	0
5	2	mouth	5	f/N	FO	old_5	0	resp_old	1	1.84067	129.196	3	0.313425	129.588	0	0
5	2	south	5	f/N	FO	new_unrel	0	resp_new	1	3.68706	133.855	2	0.276242	134.215	0	0
5	2	movie	5	f/N	FO	new_unrel	0	resp_new	1	1.6475	136.439	2	0.298961	136.823	0	0
5	2	shoe	5	f/N	FO	new_rel	0	resp_new	1	2.46501	139.868	3	0.324116	140.273	0	0
5	2	kick	5	f/N	FO	old_12	0	resp_old	1	1.24842	142.103	3	0.424698	142.612	0	0
5	2	foot	5	f/N	FO	new_crit	0	resp_new	1	1.5888	144.775	3	0.277803	145.13	0	0
5	2	arm	5	f/N	FO	new_rel	0	resp_old	0	2.52008	148.225	3	0.36596	148.67	0	0
5	2	sandals	5	f/N	FO	old_1	0	resp_old	1	1.00805	150.258	3	0.35582	150.698	0	0
5	2	raised	6	f/n	BA	old_1	1	resp_old	1	1.38364	153.752	3	0.561455	154.395	0	0
5	2	beach	6	f/n	BA	new_unrel	1	resp_new	1	2.69631	157.676	2	0.44259	158.208	0	0
5	2	checkered	6	f/n	BA	new_rel	1	resp_new	1	2.26278	161.054	3	0.308117	161.445	0	0
5	2	freedom	6	f/n	BA	old_10	1	resp_old	1	1.43035	163.46	3	0.253043	163.801	0	0
5	2	penalty	6	f/n	BA	new_unrel	1	resp_new	1	1.74701	166.135	2	1.02424	167.238	0	0
5	2	banner	6	f/n	BA	old_3	1	resp_old	1	1.54166	169.354	3	0.287021	169.725	0	0
5	2	American	6	f/n	BA	new_rel	1	resp_new	1	2.01904	172.323	3	1.11003	173.52	0	0
5	2	flag	6	f/n	BA	new_crit	1	resp_new	1	1.46594	175.568	3	0.295184	175.943	0	0
5	3	light	1	F/N	SO	old_1	0	resp_old	1	4.50731	8.67265	3	0.386207	9.13559	0	0
5	3	canal	1	F/N	SO	new_unrel	0	resp_old	0	2.23297	11.9418	2	0.351831	12.3793	0	0
5	3	tender	1	F/N	SO	old_3	0	resp_old	1	2.89531	15.8556	3	0.895342	16.8274	0	0
5	3	furry	1	F/N	SO	new_rel	0	resp_old	0	1.37769	18.7888	3	0.322987	19.1999	0	0
5	3	kitten	1	F/N	SO	new_rel	0	resp_new	1	1.43585	21.2189	2	0.577931	21.8801	0	0
5	3	rattlesnak	1	F/N	SO	new_unrel	0	resp_new	1	3.63427	26.0958	2	1.78779	27.9672	0	0
5	3	soft	1	F/N	SO	new_crit	0	resp_new	1	2.17516	30.7265	3	0.346009	31.1494	0	0
5	3	touch	1	F/N	SO	old_12	0	resp_old	1	1.51874	33.2416	2	0.832885	34.1548	0	0
5	3	rose	2	F/n	NO	old_1	2	resp_old	1	2.30407	38.5443	3	0.864202	39.4898	0	0
5	3	breathe	2	F/n	NO	old_3	2	resp_new	0	4.28439	44.3491	1	0.506368	44.9419	0	0
5	3	barrel	2	F/n	NO	new_unrel	2	resp_new	1	2.46801	47.9963	2	1.10756	49.181	0	0
5	3	whiff	2	F/n	NO	new_rel	2	resp_new	1	1.5123	51.2781	3	0.396662	51.7616	0	0
5	3	nostril	2	F/n	NO	old_9	2	resp_old	1	2.97731	55.315	3	0.50252	55.9059	0	0
5	3	servant	2	F/n	NO	new_unrel	2	resp_new	1	1.61236	58.0951	2	0.824105	58.9992	0	0
5	3	see	2	F/n	NO	new_rel	2	resp_new	1	1.26622	60.8397	3	0.302859	61.2223	0	0
5	3	smell	2	F/n	NO	new_crit	2	resp_new	1	1.82328	63.6222	3	0.300524	64.005	0	0
5	3	mean	3	F/n	M	old_4	2	resp_old	1	2.23876	68.1953	2	1.22888	69.5041	0	0
5	3	happy	3	F/n	M	old_1	2	resp_old	1	1.21993	71.3074	3	0.60143	71.9948	0	0
5	3	fury	3	F/n	M	new_rel	2	resp_old	0	1.03192	73.6113	3	0.371591	74.0703	0	0
5	3	dinner	3	F/n	M	new_unrel	2	resp_old	0	4.1383	78.7832	3	0.399618	79.2687	0	0
5	3	earthworm	3	F/n	M	new_unrel	2	resp_new	1	3.05666	82.9119	3	0.342491	83.3426	0	0
5	3	anger	3	F/n	M	new_crit	2	resp_new	1	1.20171	85.1213	2	0.461745	85.6606	0	0
5	3	hatred	3	F/n	M	new_rel	2	resp_new	1	1.72927	87.9675	3	1.00111	89.0516	0	0
5	3	rage	3	F/n	M	old_11	2	resp_old	1	1.5652	91.2015	3	0.524214	91.8129	0	0
5	3	kiwi	4	f/n	A	old_12	1	resp_old	1	1.33667	95.1172	3	0.335341	95.5284	0	0
5	3	player	4	f/n	A	new_unrel	1	resp_new	1	1.2612	97.3737	3	0.496174	97.9546	0	0
5	3	journal	4	f/n	A	new_unrel	1	resp_new	1	0.868288	99.4061	3	0.290355	99.7743	0	0
5	3	juice	4	f/n	A	old_1	1	resp_old	1	0.897132	101.247	3	0.334482	101.657	0	0
5	3	pear	4	f/n	A	new_rel	1	resp_new	1	1.48291	103.725	3	0.301942	104.103	0	0
5	3	fruit	4	f/n	A	new_crit	1	resp_new	1	1.20193	105.883	3	0.286939	106.247	0	0
5	3	berry	4	f/n	A	old_3	1	resp_old	1	1.00215	107.829	3	0.318315	108.224	0	0
5	3	ripe	4	f/n	A	new_rel	1	resp_new	1	1.42493	110.224	3	0.27754	110.582	0	0
5	3	flour	5	f/N	BR	old_1	0	resp_old	1	1.07341	113.27	3	0.23042	113.586	0	0
5	3	rye	5	f/N	BR	new_rel	0	resp_new	1	1.64186	115.811	3	0.182398	116.07	0	0
5	3	butter	5	f/N	BR	old_2	0	resp_old	1	1.03742	117.685	3	0.257929	118.025	0	0
5	3	loaf	5	f/N	BR	new_rel	0	resp_new	1	1.7353	120.342	2	0.494351	120.913	0	0
5	3	judge	5	f/N	BR	new_unrel	0	resp_new	1	1.30698	122.805	3	0.277561	123.161	0	0
5	3	wine	5	f/N	BR	old_12	0	resp_old	1	1.16043	124.897	3	0.297151	125.273	0	0
5	3	bread	5	f/N	BR	new_crit	0	resp_new	1	1.33113	127.187	3	0.250665	127.519	0	0
5	3	model	5	f/N	BR	new_unrel	0	resp_new	1	1.67688	129.771	3	0.29593	130.149	0	0
5	3	dictator	6	f/n	QU	old_1	1	resp_old	1	1.81177	133.531	3	0.264274	133.875	0	0
5	3	royal	6	f/n	QU	new_rel	1	resp_new	1	1.09601	135.547	2	1.05629	136.68	0	0
5	3	palace	6	f/n	QU	old_7	1	resp_old	1	1.13734	138.4	3	0.262968	138.751	0	0
5	3	yellow	6	f/n	QU	new_unrel	1	resp_new	1	0.997049	140.325	3	1.07504	141.482	0	0
5	3	monarch	6	f/n	QU	new_rel	1	resp_new	1	0.868287	142.928	3	0.24012	143.26	0	0
5	3	oven	6	f/n	QU	new_unrel	1	resp_new	1	0.7218	144.568	3	0.244905	144.904	0	0
5	3	king	6	f/n	QU	new_crit	1	resp_new	1	1.75882	147.243	3	0.279287	147.602	0	0
5	3	queen	6	f/n	QU	old_5	1	resp_old	1	1.40745	149.583	3	0.258598	149.927	0	0
5	4	uneven	1	F/N	ROU	old_1	0	resp_old	1	2.08084	4.16055	3	0.275475	4.51407	0	0
5	4	sand	1	F/N	ROU	new_rel	0	resp_new	1	1.28352	6.37482	2	0.602452	7.0663	0	0
5	4	sparrow	1	F/N	ROU	new_unrel	0	resp_new	1	1.06721	8.71704	3	0.343408	9.13925	0	0
5	4	agent	1	F/N	ROU	new_unrel	0	resp_new	1	1.08511	10.8004	3	0.277711	11.1657	0	0
5	4	jagged	1	F/N	ROU	new_rel	0	resp_new	1	1.21332	12.9541	2	0.60441	13.6378	0	0
5	4	rugged	1	F/N	ROU	old_5	0	resp_new	0	1.17857	15.398	1	2.67325	18.1586	0	0
5	4	rough	1	F/N	ROU	new_crit	0	resp_new	1	1.96416	20.701	3	0.268211	21.0572	0	0
5	4	tough	1	F/N	ROU	old_7	0	resp_old	1	1.85824	23.5	3	0.403174	23.9913	0	0
5	4	insect	2	f/n	WE	old_3	1	resp_new	0	3.44015	29.2404	3	0.361433	29.6929	0	0
5	4	organ	2	f/n	WE	new_unrel	1	resp_new	1	1.39559	31.6724	3	0.278786	32.0348	0	0
5	4	fly	2	f/n	WE	new_rel	1	resp_new	1	1.00246	33.6113	3	0.821643	34.5099	0	0
5	4	bug	2	f/n	WE	old_12	1	resp_old	1	1.78815	36.8756	3	0.641402	37.5944	0	0
5	4	bridge	2	f/n	WE	new_unrel	1	resp_new	1	1.13748	39.3165	2	0.682123	40.0871	0	0
5	4	small	2	f/n	WE	new_rel	1	resp_new	1	1.09689	41.7681	3	1.09987	42.9567	0	0
5	4	spider	2	f/n	WE	new_crit	1	resp_new	1	2.06297	45.5989	2	0.529901	46.2112	0	0
5	4	poison	2	f/n	WE	old_1	1	resp_old	1	2.61425	49.4016	3	0.318078	49.7972	0	0
5	4	sedan	3	f/N	C	old_1	0	resp_old	1	2.19217	53.5769	3	0.357866	54.0213	0	0
5	4	automobile	3	f/N	C	new_rel	0	resp_new	1	1.21946	55.8157	2	1.80244	57.7046	0	0
5	4	drive	3	f/N	C	new_rel	0	resp_new	1	1.26617	59.5536	3	0.896006	60.5293	0	0
5	4	truck	3	f/N	C	old_12	0	resp_old	1	1.02655	62.139	3	0.242789	62.4613	0	0
5	4	moisture	3	f/N	C	new_unrel	0	resp_new	1	2.08708	65.1318	3	0.925884	66.1427	0	0
5	4	partner	3	f/N	C	new_unrel	0	resp_new	1	1.07863	67.8012	3	0.244508	68.1264	0	0
5	4	train	3	f/N	C	old_4	0	resp_old	1	2.163	70.8711	1	1.33075	72.2776	0	0
5	4	car	3	f/N	C	new_crit	0	resp_new	1	1.31914	74.1715	3	0.277373	74.529	0	0
5	4	lid	4	F/N	CU	old_2	0	resp_old	1	3.05372	79.3708	3	0.318627	79.7672	0	0
5	4	handle	4	F/N	CU	old_1	0	resp_old	1	0.996418	81.3378	3	0.26476	81.6856	0	0
5	4	bullet	4	F/N	CU	new_unrel	0	resp_new	1	1.05548	83.3158	3	0.248014	83.641	0	0
5	4	tea	4	F/N	CU	new_rel	0	resp_old	0	3.65114	87.8703	2	0.772608	88.723	0	0
5	4	goblet	4	F/N	CU	new_rel	0	resp_new	1	1.16669	90.4763	3	0.382864	90.9451	0	0
5	4	coffee	4	F/N	CU	old_10	0	resp_old	1	1.84696	93.3686	3	0.290532	93.7444	0	0
5	4	cup	4	F/N	CU	new_crit	0	resp_new	1	1.17866	95.4987	3	0.240842	95.8269	0	0
5	4	fabric	4	F/N	CU	new_unrel	0	resp_new	1	4.79461	101.207	2	0.503408	101.793	0	0
5	4	recliner	5	F/n	TA	old_2	1	resp_old	1	1.70564	105.713	3	0.235533	106.029	0	0
5	4	stool	5	F/n	TA	old_11	1	resp_old	1	1.07919	107.686	2	0.563479	108.329	0	0
5	4	couch	5	F/n	TA	new_rel	1	resp_old	0	2.0811	110.993	3	0.323734	111.394	0	0
5	4	swivel	5	F/n	TA	old_1	1	resp_old	1	1.12595	113.103	3	0.281505	113.471	0	0
5	4	poem	5	F/n	TA	new_unrel	1	resp_new	1	1.07291	115.128	3	0.501536	115.716	0	0
5	4	helmet	5	F/n	TA	new_unrel	1	resp_new	1	1.6417	117.936	3	0.350471	118.377	0	0
5	4	legs	5	F/n	TA	new_rel	1	resp_new	1	0.991256	119.951	3	0.23708	120.276	0	0
5	4	chair	5	F/n	TA	new_crit	1	resp_new	1	2.50882	123.36	2	0.325583	123.776	0	0
5	4	chocolate	6	F/n	HON	old_5	1	resp_old	1	1.14293	126.526	3	0.196255	126.805	0	0
5	4	taste	6	F/n	HON	new_rel	1	resp_new	1	1.09639	128.477	3	0.215086	128.782	0	0
5	4	good	6	F/n	HON	old_9	1	resp_old	1	1.13174	130.498	3	0.210122	130.789	0	0
5	4	tooth	6	F/n	HON	new_rel	1	resp_new	1	1.07857	132.444	3	0.211249	132.736	0	0
5	4	alligator	6	F/n	HON	new_unrel	1	resp_new	1	0.967586	134.279	3	0.28084	134.645	0	0
5	4	sweet	6	F/n	HON	new_crit	1	resp_new	1	1.03221	136.262	3	0.205872	136.555	0	0
5	4	nice	6	F/n	HON	old_1	1	resp_old	1	1.72964	138.865	3	0.303131	139.251	0	0
5	4	city	6	F/n	HON	new_unrel	1	resp_new	1	1.02651	140.854	3	0.235925	141.169	0	0
6	1	eat	1	f/N	BR	old_4	0	resp_new	0	5.42466	11.2346	2	7.09039	18.4215	0	0
6	1	dough	1	f/N	BR	new_rel	0	resp_new	1	6.4653	25.4728	2	2.16521	27.7221	0	0
6	1	crust	1	f/N	BR	new_rel	0	resp_new	1	3.21819	31.5147	2	1.0931	32.6857	0	0
6	1	jelly	1	f/N	BR	old_1	0	resp_new	0	4.63632	37.8984	2	1.12738	39.1124	0	0
6	1	model	1	f/N	BR	new_unrel	0	resp_new	1	7.34307	47.0404	1	1.64457	48.7759	0	0
6	1	toast	1	f/N	BR	old_7	0	resp_old	1	7.53	56.8873	2	2.48423	59.4611	0	0
6	1	judge	1	f/N	BR	new_unrel	0	resp_new	1	4.06169	64.1063	2	1.27093	65.4678	0	0
6	1	bread	1	f/N	BR	new_crit	0	resp_new	1	12.5469	78.5987	1	1.44644	80.1262	1	1
6	1	highway	2	f/N	C	old_2	0	resp_new	0	2.77222	89.9704	2	1.14807	91.2	0	0
6	1	Ford	2	f/N	C	old_1	0	resp_new	0	1.15466	92.9474	2	0.606683	93.6408	0	0
6	1	partner	2	f/N	C	new_unrel	0	resp_new	1	1.68251	95.901	2	0.726718	96.7145	0	0
6	1	van	2	f/N	C	new_rel	0	resp_new	1	1.48911	98.7754	2	1.18143	100.037	0	0
6	1	taxi	2	f/N	C	old_10	0	resp_new	0	3.59304	104.204	2	1.13837	105.431	0	0
6	1	sedan	2	f/N	C	new_rel	0	resp_new	1	1.73508	107.74	2	0.477686	108.294	0	0
6	1	moisture	2	f/N	C	new_unrel	0	resp_new	1	2.10971	110.982	2	1.04231	112.112	0	0
6	1	car	2	f/N	C	new_crit	0	resp_new	1	3.27957	115.976	2	1.01965	117.084	0	0
6	1	soup	3	F/N	CU	old_1	0	resp_old	1	4.95825	124.29	1	0.63822	125.007	0	0
6	1	mug	3	F/N	CU	new_rel	0	resp_old	0	1.34795	126.944	1	0.443562	127.466	0	0
6	1	fabric	3	F/N	CU	new_unrel	0	resp_old	0	1.23683	129.287	1	0.383481	129.76	0	0
6	1	lid	3	F/N	CU	old_10	0	resp_new	0	0.69236	131.025	2	0.544929	131.648	0	0
6	1	sip	3	F/N	CU	old_2	0	resp_old	1	1.45416	133.685	1	1.16424	134.936	0	0
6	1	bullet	3	F/N	CU	new_unrel	0	resp_old	0	1.28411	136.797	1	1.01208	137.894	0	0
6	1	coffee	3	F/N	CU	new_rel	0	resp_old	0	5.11032	143.591	1	0.612867	144.288	0	0
6	1	cup	3	F/N	CU	new_crit	0	resp_new	1	4.22751	149.101	2	0.324597	149.507	0	0
6	1	sister	4	f/n	BO	old_3	1	resp_new	0	4.3897	157.595	2	0.949429	158.636	0	0
6	1	schools	4	f/n	BO	new_unrel	1	resp_old	0	1.09678	160.31	2	0.414448	160.812	0	0
6	1	hair	4	f/n	BO	new_rel	1	resp_old	0	1.23162	162.628	2	0.434296	163.143	0	0
6	1	episode	4	f/n	BO	new_unrel	1	resp_new	1	1.92259	165.644	2	0.801405	166.535	0	0
6	1	niece	4	f/n	BO	old_11	1	resp_old	1	1.36588	168.484	2	0.393896	168.967	0	0
6	1	girl	4	f/n	BO	new_crit	1	resp_new	1	0.885786	170.429	2	0.370602	170.884	0	0
6	1	dolls	4	f/n	BO	old_1	1	resp_old	1	1.40127	172.871	3	1.16254	174.116	0	0
6	1	female	4	f/n	BO	new_rel	1	resp_new	1	1.7991	176.494	2	0.408819	176.987	0	0
6	1	cigarette	5	F/N	SM	old_9	0	resp_new	0	4.02118	183.453	2	0.273781	183.815	0	0
6	1	mathematic	5	F/N	SM	new_unrel	0	resp_new	1	1.03217	185.43	1	0.467088	185.977	0	0
6	1	pollution	5	F/N	SM	new_rel	0	resp_old	0	0.715725	187.268	2	0.401085	187.752	0	0
6	1	flames	5	F/N	SM	new_rel	0	resp_new	1	1.45398	189.79	2	0.368028	190.245	0	0
6	1	jewel	5	F/N	SM	new_unrel	0	resp_old	0	0.539745	191.358	2	0.363159	191.809	0	0
6	1	smoke	5	F/N	SM	new_crit	0	resp_new	1	6.56313	198.951	2	9.07185	208.109	1	1
6	1	pipe	5	F/N	SM	old_1	0	resp_new	0	4.04358	212.727	2	0.423817	213.23	0	0
6	1	tobacco	5	F/N	SM	old_3	0	resp_new	0	0.574636	214.38	2	5.15533	219.617	0	0
6	1	light	6	F/N	SO	old_1	0	resp_old	1	2.67836	224.731	1	0.375072	225.196	0	0
6	1	furry	6	F/N	SO	new_rel	0	resp_new	1	1.06096	226.838	1	0.622724	227.541	0	0
6	1	rattlesnak	6	F/N	SO	new_unrel	0	resp_new	1	1.73503	229.852	1	0.20152	230.145	0	0
6	1	fluffy	6	F/N	SO	new_rel	0	resp_old	0	2.11053	232.839	2	0.881008	233.807	0	0
6	1	loud	6	F/N	SO	old_3	0	resp_old	1	1.15538	235.536	1	0.385699	236.008	0	0
6	1	canal	6	F/N	SO	new_unrel	0	resp_old	0	1.09049	237.683	1	0.517192	238.28	0	0
6	1	soft	6	F/N	SO	new_crit	0	resp_new	1	3.42108	242.283	2	0.921785	243.293	0	0
6	1	hard	6	F/N	SO	old_7	0	resp_new	0	0.856482	244.726	2	0.76145	245.573	0	0
6	2	refuse	1	F/N	T	old_7	0	resp_old	1	8.45876	11.2402	2	0.880588	12.209	0	0
6	2	pony	1	F/N	T	new_unrel	0	resp_new	1	1.81142	14.5953	2	0.527925	15.2095	0	0
6	2	scholar	1	F/N	T	new_unrel	0	resp_new	1	0.979577	16.7742	2	0.515903	17.3807	0	0
6	2	scraps	1	F/N	T	old_1	0	resp_new	0	0.598138	18.5616	2	0.425964	19.0743	0	0
6	2	rubbish	1	F/N	T	new_rel	0	resp_old	0	1.20222	20.8637	2	0.54115	21.4868	0	0
6	2	sewage	1	F/N	T	old_4	0	resp_old	1	0.926873	22.9997	2	0.418704	23.5046	0	0
6	2	trash	1	F/N	T	new_crit	0	resp_old	0	0.955382	25.0401	2	0.428363	25.5547	0	0
6	2	can	1	F/N	T	new_rel	0	resp_old	0	1.75844	27.8979	2	0.403145	28.3833	0	0
6	2	mouth	2	f/N	FO	old_12	0	resp_old	1	1.89886	41.2798	2	0.401921	41.7662	0	0
6	2	movie	2	f/N	FO	new_unrel	0	resp_new	1	0.65679	43.0056	2	0.26736	43.3582	0	0
6	2	boot	2	f/N	FO	new_rel	0	resp_new	1	1.08497	45.0177	2	0.270394	45.3731	0	0
6	2	inch	2	f/N	FO	old_1	0	resp_new	0	0.785616	46.7445	2	0.254096	47.0834	0	0
6	2	south	2	f/N	FO	new_unrel	0	resp_old	0	0.586886	48.2437	2	0.152551	48.48	0	0
6	2	soccer	2	f/N	FO	new_rel	0	resp_new	1	1.15573	50.2109	2	0.311694	50.6083	0	0
6	2	hand	2	f/N	FO	old_5	0	resp_old	1	0.656753	51.838	2	0.296573	52.2198	0	0
6	2	foot	2	f/N	FO	new_crit	0	resp_old	0	0.569015	53.3626	2	0.287671	53.7377	0	0
6	2	war	3	f/N	AR	old_3	0	resp_old	1	3.82733	62.2722	2	0.218465	62.573	0	0
6	2	marines	3	f/N	AR	old_1	0	resp_old	1	0.65087	63.8037	2	0.215527	64.1103	0	0
6	2	air force	3	f/N	AR	old_12	0	resp_old	1	0.451829	65.1456	2	0.253366	65.4894	0	0
6	2	crystal	3	f/N	AR	new_unrel	0	resp_new	1	0.849865	66.9135	2	0.222195	67.2133	0	0
6	2	soldier	3	f/N	AR	new_rel	0	resp_old	0	0.598221	68.3884	2	0.191578	68.6666	0	0
6	2	army	3	f/N	AR	new_crit	0	resp_old	0	0.615621	69.8612	2	0.226999	70.1717	0	0
6	2	freckle	3	f/N	AR	new_unrel	0	resp_new	1	0.698104	71.4562	2	0.214089	71.7569	0	0
6	2	navy	3	f/N	AR	new_rel	0	resp_old	0	0.568573	72.9105	2	0.221782	73.2201	0	0
6	2	throne	4	f/n	QU	old_1	1	resp_new	0	0.821302	77.3154	2	1.08167	78.4747	0	0
6	2	yellow	4	f/n	QU	new_unrel	1	resp_new	1	0.896871	79.9594	2	0.265839	80.3129	0	0
6	2	oven	4	f/n	QU	new_unrel	1	resp_new	1	0.59217	81.4811	2	0.235004	81.7946	0	0
6	2	subjects	4	f/n	QU	old_7	1	resp_old	1	0.686561	83.0594	2	0.255893	83.3993	0	0
6	2	queen	4	f/n	QU	old_6	1	resp_old	1	0.61543	84.6007	2	0.271731	84.9562	0	0
6	2	George	4	f/n	QU	new_rel	1	resp_new	1	1.03797	86.5785	2	0.220296	86.8881	0	0
6	2	king	4	f/n	QU	new_crit	1	resp_old	0	5.26298	92.7298	2	9.33273	102.15	1	1
6	2	royal	4	f/n	QU	new_rel	1	resp_new	1	1.85846	104.593	2	0.443311	105.118	0	0
6	2	symbol	5	f/n	BA	old_1	1	resp_new	0	3.51062	113.123	2	0.423539	113.631	0	0
6	2	beach	5	f/n	BA	new_unrel	1	resp_new	1	2.60816	116.815	2	0.360286	117.264	0	0
6	2	checkered	5	f/n	BA	old_10	1	resp_old	1	0.98036	118.826	2	0.402662	119.318	0	0
6	2	penalty	5	f/n	BA	new_unrel	1	resp_old	0	0.855612	120.755	2	0.992123	121.834	0	0
6	2	American	5	f/n	BA	new_rel	1	resp_new	1	2.71996	125.131	2	0.262514	125.485	0	0
6	2	flag	5	f/n	BA	new_crit	1	resp_new	1	0.774434	126.838	2	0.259119	127.179	0	0
6	2	stars	5	f/n	BA	new_rel	1	resp_new	1	2.09252	129.855	2	0.14434	130.075	0	0
6	2	freedom	5	f/n	BA	old_6	1	resp_new	0	0.504727	131.163	2	0.648292	131.892	0	0
6	2	tart	6	F/n	HON	old_12	1	resp_old	1	1.04922	134.719	2	0.233509	135.03	0	0
6	2	alligator	6	F/n	HON	new_unrel	1	resp_new	1	0.98492	136.595	2	0.207725	136.888	0	0
6	2	chocolate	6	F/n	HON	new_rel	1	resp_old	0	0.814791	138.28	2	0.137519	138.501	0	0
6	2	city	6	F/n	HON	new_unrel	1	resp_new	1	0.885285	139.962	2	0.158154	140.206	0	0
6	2	taste	6	F/n	HON	old_4	1	resp_new	0	1.0317	141.821	2	0.14821	142.051	0	0
6	2	sweet	6	F/n	HON	new_crit	1	resp_old	0	0.580874	143.211	2	0.212982	143.514	0	0
6	2	sour	6	F/n	HON	old_1	1	resp_old	1	0.656336	144.756	2	0.178016	145.02	0	0
6	2	good	6	F/n	HON	new_rel	1	resp_new	1	0.996288	146.594	2	0.195232	146.878	0	0
6	3	bench	1	F/n	TA	old_2	1	resp_new	0	2.50903	6.03025	2	0.295885	6.41404	0	0
6	3	poem	1	F/n	TA	new_unrel	1	resp_new	1	0.733358	7.72188	2	0.216893	8.01874	0	0
6	3	helmet	1	F/n	TA	new_unrel	1	resp_new	1	1.10175	9.70265	2	0.322725	10.1079	0	0
6	3	desk	1	F/n	TA	new_rel	1	resp_new	1	1.0198	11.7039	2	0.183772	11.9666	0	0
6	3	table	1	F/n	TA	old_1	1	resp_old	1	0.896918	13.4503	2	0.394833	13.9327	0	0
6	3	stool	1	F/n	TA	old_10	1	resp_new	0	0.885764	15.394	2	0.61671	16.0952	0	0
6	3	rocking	1	F/n	TA	new_rel	1	resp_new	1	0.709386	17.3864	2	0.222829	17.6989	0	0
6	3	chair	1	F/n	TA	new_crit	1	resp_old	0	1.38896	19.6641	2	0.302105	20.047	0	0
6	3	jungle	2	f/N	L	old_1	0	resp_new	0	1.21311	23.3551	2	1.01535	24.4558	0	0
6	3	cousin	2	f/N	L	new_unrel	0	resp_new	1	0.809098	25.8477	2	0.184573	26.1221	0	0
6	3	tamer	2	f/N	L	new_rel	0	resp_new	1	0.662565	27.3714	2	0.201826	27.6526	0	0
6	3	number	2	f/N	L	new_unrel	0	resp_new	1	0.902651	29.1382	2	0.139745	29.3599	0	0
6	3	hunt	2	f/N	L	old_10	0	resp_old	1	0.738873	30.6717	2	0.184707	30.9451	0	0
6	3	lion	2	f/N	L	new_crit	0	resp_new	1	1.41259	32.9435	2	0.265924	33.2951	0	0
6	3	fierce	2	f/N	L	old_6	0	resp_new	0	0.715333	34.5863	2	0.210339	34.8804	0	0
6	3	tiger	2	f/N	L	new_rel	0	resp_new	1	0.944263	36.3991	2	0.248934	36.7311	0	0
6	3	small	3	f/n	WE	old_12	1	resp_new	0	1.16708	40.2034	2	0.262987	40.5549	0	0
6	3	organ	3	f/n	WE	new_unrel	1	resp_new	1	0.645005	41.7788	2	0.272769	42.1343	0	0
6	3	bridge	3	f/n	WE	new_unrel	1	resp_old	0	0.633703	43.3514	2	0.314766	43.7459	0	0
6	3	feelers	3	f/n	WE	old_1	1	resp_old	1	0.833088	45.1631	2	0.370104	45.6133	0	0
6	3	crawl	3	f/n	WE	old_3	1	resp_new	0	1.51239	47.7116	2	0.209908	48.0073	0	0
6	3	poison	3	f/n	WE	new_rel	1	resp_old	0	0.738829	49.321	2	0.238583	49.6483	0	0
6	3	arachnid	3	f/n	WE	new_rel	1	resp_new	1	1.38344	51.6065	2	0.179351	51.8721	0	0
6	3	spider	3	f/n	WE	new_crit	1	resp_new	1	0.563037	53.012	2	0.25193	53.343	0	0
6	3	smooth	4	F/N	ROU	old_3	0	resp_new	0	1.58234	56.6854	2	0.28404	57.0565	0	0
6	3	agent	4	F/N	ROU	new_unrel	0	resp_new	1	0.586705	58.2295	2	0.257876	58.5713	0	0
6	3	sandpaper	4	F/N	ROU	new_rel	0	resp_new	1	0.504128	59.6595	2	0.324391	60.0647	0	0
6	3	boards	4	F/N	ROU	old_10	0	resp_old	1	0.639546	61.2788	2	0.353264	61.7203	0	0
6	3	sparrow	4	F/N	ROU	new_unrel	0	resp_new	1	0.604139	62.9129	2	0.309852	63.3035	0	0
6	3	rough	4	F/N	ROU	new_crit	0	resp_new	1	4.58327	68.4616	2	2.88263	71.4268	1	1
6	3	uneven	4	F/N	ROU	new_rel	0	resp_new	1	3.8626	75.8741	2	0.172532	76.1365	0	0
6	3	road	4	F/N	ROU	old_1	0	resp_new	0	0.469172	77.1894	2	0.152949	77.4297	0	0
6	3	hot	5	F/n	H	old_12	2	resp_new	0	3.06583	82.1404	2	0.684259	82.9123	0	0
6	3	freeze	5	F/n	H	old_1	2	resp_old	1	0.756069	84.254	2	0.2814	84.6212	0	0
6	3	air	5	F/n	H	new_rel	2	resp_old	0	0.87378	86.0697	2	0.154091	86.306	0	0
6	3	arctic	5	F/n	H	new_rel	2	resp_old	0	1.09101	87.9707	2	0.198295	88.248	0	0
6	3	shiver	5	F/n	H	old_2	2	resp_new	0	1.09032	89.9248	2	0.223981	90.2285	0	0
6	3	dandruff	5	F/n	H	new_unrel	2	resp_new	1	0.656607	91.4602	2	0.219303	91.7649	0	0
6	3	cold	5	F/n	H	new_crit	2	resp_new	1	0.7506	93.0952	2	0.225736	93.3979	0	0
6	3	money	5	F/n	H	new_unrel	2	resp_new	1	0.457161	94.4284	2	0.215713	94.7292	0	0
6	3	screen	6	F/n	D	old_4	1	resp_old	1	1.14308	97.4972	2	0.416966	97.9982	0	0
6	3	house	6	F/n	D	old_11	1	resp_new	0	0.49845	99.0785	2	0.222988	99.3881	0	0
6	3	open	6	F/n	D	new_rel	1	resp_new	1	0.434102	100.399	2	0.285682	100.764	0	0
6	3	chapter	6	F/n	D	new_unrel	1	resp_new	1	0.656643	102.006	2	0.196759	102.287	0	0
6	3	breeze	6	F/n	D	old_1	1	resp_old	1	0.78005	103.641	2	0.260204	103.991	0	0
6	3	window	6	F/n	D	new_crit	1	resp_old	0	0.709594	105.283	2	0.282634	105.655	0	0
6	3	shutter	6	F/n	D	new_rel	1	resp_new	1	0.663068	106.891	2	0.319546	107.29	0	0
6	3	mayor	6	F/n	D	new_unrel	1	resp_new	1	0.381738	108.251	2	0.276107	108.616	0	0
6	4	color	1	f/n	W	old_4	1	resp_new	0	4.03811	8.19829	1	0.448803	8.73267	0	0
6	4	ink	1	f/n	W	new_rel	1	resp_new	1	1.70585	11.0171	2	0.322651	11.4175	0	0
6	4	cauliflowe	1	f/n	W	new_unrel	1	resp_new	1	2.85398	14.8477	2	0.318194	15.2513	0	0
6	4	death	1	f/n	W	old_10	1	resp_old	1	1.92236	17.7544	2	0.923265	18.7672	0	0
6	4	brown	1	f/n	W	new_rel	1	resp_new	1	0.814949	20.1571	2	0.176758	20.4179	0	0
6	4	black	1	f/n	W	new_crit	1	resp_old	0	0.967838	21.966	2	0.272353	22.3264	0	0
6	4	thermomete	1	f/n	W	new_unrel	1	resp_new	1	0.768004	23.6782	2	0.189992	23.9555	0	0
6	4	charred	1	f/n	W	old_1	1	resp_old	1	0.803534	25.3396	2	0.256062	25.6768	0	0
6	4	bed	2	F/N	SLE	old_1	0	resp_old	1	1.73557	29.9672	2	0.586579	30.6304	0	0
6	4	blanket	2	F/N	SLE	new_rel	0	resp_old	0	1.32507	32.5389	2	0.206397	32.8329	0	0
6	4	rest	2	F/N	SLE	old_3	0	resp_old	1	0.921004	34.3322	2	0.368413	34.7785	0	0
6	4	rectangle	2	F/N	SLE	new_unrel	0	resp_new	1	1.33071	36.6968	2	0.298963	37.0776	0	0
6	4	tired	2	F/N	SLE	old_7	0	resp_old	1	0.797374	38.4607	2	0.305342	38.8534	0	0
6	4	shark	2	F/N	SLE	new_unrel	0	resp_new	1	1.76479	41.1975	2	0.282902	41.5705	0	0
6	4	sleep	2	F/N	SLE	new_crit	0	resp_old	0	5.76117	47.9192	2	0.676682	48.6849	0	0
6	4	nap	2	F/N	SLE	new_rel	0	resp_new	1	3.17066	52.4346	2	0.238651	52.7558	0	0
6	4	fragrance	3	F/n	NO	old_1	2	resp_old	1	3.26455	57.6795	2	0.24341	58.0115	0	0
6	4	hear	3	F/n	NO	new_rel	2	resp_new	1	1.09484	59.6906	2	0.363675	60.1437	0	0
6	4	servant	3	F/n	NO	new_unrel	2	resp_new	1	0.984723	61.7065	2	0.194821	61.9868	0	0
6	4	reek	3	F/n	NO	new_rel	2	resp_new	1	0.598451	63.1609	2	0.317776	63.5651	0	0
6	4	sniff	3	F/n	NO	old_3	2	resp_new	0	0.59779	64.7441	2	0.324097	65.1553	0	0
6	4	rose	3	F/n	NO	old_12	2	resp_old	1	0.762208	66.4923	2	0.278018	66.85	0	0
6	4	barrel	3	F/n	NO	new_unrel	2	resp_new	1	0.739324	68.1674	2	0.292703	68.5484	0	0
6	4	smell	3	F/n	NO	new_crit	2	resp_old	0	0.715414	69.8415	2	0.300174	70.2253	0	0
6	4	jersey	4	f/N	SHI	old_2	0	resp_old	1	1.35414	74.4898	2	0.271322	74.8481	0	0
6	4	voltage	4	f/N	SHI	new_unrel	0	resp_new	1	0.615617	76.0485	2	0.236764	76.3689	0	0
6	4	iron	4	f/N	SHI	new_rel	0	resp_new	1	1.09074	78.0362	2	0.1824	78.2979	0	0
6	4	blouse	4	f/N	SHI	old_1	0	resp_old	1	0.581076	79.467	2	0.667335	80.2239	0	0
6	4	button	4	f/N	SHI	new_rel	0	resp_new	1	1.79942	82.5974	2	0.166905	82.8484	0	0
6	4	piano	4	f/N	SHI	new_unrel	0	resp_new	1	0.726915	84.1504	2	0.184091	84.4209	0	0
6	4	shirt	4	f/N	SHI	new_crit	0	resp_new	1	3.27069	88.278	2	4.76196	93.1224	1	1
6	4	sleeves	4	f/N	SHI	old_9	0	resp_old	1	3.56964	97.2666	2	0.46373	97.8136	0	0
6	4	ripe	5	f/n	A	old_4	1	resp_new	0	0.885243	100.632	2	0.151602	100.869	0	0
6	4	citrus	5	f/n	A	old_1	1	resp_old	1	0.879086	102.324	2	0.267819	102.669	0	0
6	4	player	5	f/n	A	new_unrel	1	resp_new	1	0.726979	103.97	2	0.16364	104.22	0	0
6	4	banana	5	f/n	A	new_rel	1	resp_new	1	1.51873	106.317	2	0.167627	106.564	0	0
6	4	berry	5	f/n	A	new_rel	1	resp_new	1	0.47473	107.613	2	0.145966	107.841	0	0
6	4	fruit	5	f/n	A	new_crit	1	resp_new	1	0.457614	108.881	2	0.177045	109.142	0	0
6	4	journal	5	f/n	A	new_unrel	1	resp_new	1	0.815378	110.536	2	0.206481	110.826	0	0
6	4	kiwi	5	f/n	A	old_9	1	resp_new	0	0.932716	112.337	2	0.161882	112.58	0	0
6	4	happy	6	F/n	M	old_1	1	resp_old	1	1.26081	115.619	2	0.202019	115.902	0	0
6	4	earthworm	6	F/n	M	new_unrel	1	resp_new	1	0.797142	117.281	2	0.205377	117.574	0	0
6	4	mean	6	F/n	M	new_rel	1	resp_new	1	1.11433	119.268	2	0.157937	119.51	0	0
6	4	dinner	6	F/n	M	new_unrel	1	resp_new	1	0.668132	120.762	2	0.202886	121.053	0	0
6	4	wrath	6	F/n	M	old_12	1	resp_old	1	0.762066	122.397	2	0.331413	122.809	0	0
6	4	emotion	6	F/n	M	old_6	1	resp_old	1	0.846341	124.237	2	0.278116	124.596	0	0
6	4	anger	6	F/n	M	new_crit	1	resp_old	0	0.902979	126.077	2	0.281953	126.441	0	0
6	4	ire	6	F/n	M	new_rel	1	resp_new	1	0.66874	127.683	2	0.275784	128.047	0	0
7	1	freedom	1	f/n	BA	old_11	1	resp_new	0	3.91219	10.0674	3	1.67179	11.8297	0	0
7	1	emblem	1	f/n	BA	new_rel	1	resp_old	0	2.33375	14.7523	3	1.44164	16.2742	0	0
7	1	checkered	1	f/n	BA	old_1	1	resp_old	1	4.30765	21.1655	3	1.30136	22.5514	0	0
7	1	stripes	1	f/n	BA	new_rel	1	resp_old	0	3.55174	26.6859	3	1.03141	27.8042	0	0
7	1	penalty	1	f/n	BA	new_unrel	1	resp_new	1	2.0456	30.4315	3	1.02569	31.543	0	0
7	1	flag	1	f/n	BA	new_crit	1	resp_old	0	4.36057	36.4793	2	1.14306	37.7011	0	0
7	1	beach	1	f/n	BA	new_unrel	1	resp_new	1	4.33677	42.614	2	1.22487	43.9178	0	0
7	1	sign	1	f/n	BA	old_2	1	resp_old	1	3.7159	48.2105	1	1.7584	50.0564	0	0
7	1	insect	2	f/n	WE	old_12	1	resp_old	1	2.19173	55.3883	2	0.949483	56.4186	0	0
7	1	fright	2	f/n	WE	new_rel	1	resp_new	1	2.31559	59.3273	3	0.990744	60.4046	0	0
7	1	arachnid	2	f/n	WE	old_6	1	resp_old	1	2.53834	63.5183	1	0.955507	64.5614	0	0
7	1	small	2	f/n	WE	new_rel	1	resp_new	1	1.6878	66.8245	1	0.961631	67.8646	0	0
7	1	feelers	2	f/n	WE	old_1	1	resp_old	1	3.01832	71.4639	3	0.645056	72.1875	0	0
7	1	bridge	2	f/n	WE	new_unrel	1	resp_new	1	2.9073	75.6744	2	2.04163	77.7997	0	0
7	1	spider	2	f/n	WE	new_crit	1	resp_old	0	1.53062	79.9145	2	0.826455	80.8236	0	0
7	1	organ	2	f/n	WE	new_unrel	1	resp_new	1	1.72336	83.1218	2	0.793836	83.9939	0	0
7	1	sandpaper	3	F/N	ROU	old_12	0	resp_new	0	2.13988	88.4721	2	0.896816	89.4547	0	0
7	1	coarse	3	F/N	ROU	new_rel	0	resp_new	1	2.29156	92.333	1	0.674728	93.0948	0	0
7	1	sparrow	3	F/N	ROU	new_unrel	0	resp_new	1	2.52073	96.2008	2	1.11383	97.3962	0	0
7	1	uneven	3	F/N	ROU	old_1	0	resp_old	1	1.98108	99.9591	1	0.762283	100.801	0	0
7	1	road	3	F/N	ROU	old_4	0	resp_new	0	1.98088	103.362	1	0.86754	104.309	0	0
7	1	rough	3	F/N	ROU	new_crit	0	resp_new	1	2.44994	107.34	3	1.21329	108.635	0	0
7	1	bumpy	3	F/N	ROU	new_rel	0	resp_new	1	3.39967	112.611	1	1.39479	114.092	0	0
7	1	agent	3	F/N	ROU	new_unrel	0	resp_new	1	2.4446	117.121	2	0.610218	117.818	0	0
7	1	plush	4	F/N	SO	old_1	0	resp_old	1	2.81346	122.541	2	1.39542	124.019	0	0
7	1	rattlesnak	4	F/N	SO	new_unrel	0	resp_new	1	1.75838	126.36	1	0.674357	127.125	0	0
7	1	canal	4	F/N	SO	new_unrel	0	resp_new	1	1.70586	129.405	2	0.586905	130.076	0	0
7	1	hard	4	F/N	SO	new_rel	0	resp_new	1	1.31899	131.974	2	1.25473	133.311	0	0
7	1	loud	4	F/N	SO	new_rel	0	resp_new	1	4.02693	137.92	2	0.914529	138.917	0	0
7	1	kitten	4	F/N	SO	old_3	0	resp_new	0	1.91653	141.414	1	0.815193	142.315	0	0
7	1	skin	4	F/N	SO	old_11	0	resp_new	0	1.24243	144.132	2	1.17861	145.387	0	0
7	1	soft	4	F/N	SO	new_crit	0	resp_old	0	1.38925	147.352	1	7.9585	155.393	0	0
7	1	drink	5	F/N	CU	old_11	0	resp_old	1	2.24529	159.43	2	1.19615	160.712	0	0
7	1	coffee	5	F/N	CU	new_rel	0	resp_new	1	1.64697	162.941	3	0.768614	163.794	0	0
7	1	saucer	5	F/N	CU	old_1	0	resp_old	1	1.51248	165.88	3	0.680718	166.638	0	0
7	1	bullet	5	F/N	CU	new_unrel	0	resp_new	1	1.44844	168.665	3	0.72729	169.475	0	0
7	1	mug	5	F/N	CU	old_5	0	resp_old	1	1.43618	171.491	2	1.07877	172.653	0	0
7	1	cup	5	F/N	CU	new_crit	0	resp_new	1	1.86382	175.098	3	0.604503	175.782	0	0
7	1	fabric	5	F/N	CU	new_unrel	0	resp_new	1	2.49678	178.863	2	0.697348	179.642	0	0
7	1	sip	5	F/N	CU	new_rel	0	resp_new	1	1.30191	181.519	2	0.932046	182.538	0	0
7	1	eat	6	f/N	BR	old_1	0	resp_old	1	6.49947	194.147	2	1.76399	195.993	0	0
7	1	judge	6	f/N	BR	new_unrel	0	resp_new	1	1.91133	198.484	2	0.622536	199.185	0	0
7	1	rye	6	f/N	BR	new_rel	0	resp_new	1	1.42472	201.189	3	0.587434	201.859	0	0
7	1	toast	6	f/N	BR	old_6	0	resp_old	1	3.44672	205.884	3	0.257847	206.227	0	0
7	1	jelly	6	f/N	BR	new_rel	0	resp_new	1	2.64306	209.449	1	0.223737	209.749	0	0
7	1	model	6	f/N	BR	new_unrel	0	resp_new	1	1.98106	212.307	2	0.192819	212.58	0	0
7	1	bread	6	f/N	BR	new_crit	0	resp_new	1	2.71403	215.878	3	0.22889	216.196	0	0
7	1	sandwich	6	f/N	BR	old_11	0	resp_new	0	1.56518	218.344	2	2.01456	220.442	0	0
7	2	dream	1	F/N	SLE	old_3	0	resp_old	1	3.51088	6.25709	1	0.804235	7.14192	0	0
7	2	snooze	1	F/N	SLE	old_1	0	resp_old	1	1.87605	9.6032	1	0.371604	10.0535	0	0
7	2	shark	1	F/N	SLE	new_unrel	0	resp_new	1	1.45429	12.0899	2	0.728143	12.8947	0	0
7	2	peace	1	F/N	SLE	old_8	0	resp_new	0	1.83469	15.3082	2	0.165283	15.5582	0	0
7	2	rectangle	1	F/N	SLE	new_unrel	0	resp_new	1	1.75881	17.8935	3	0.106292	18.0898	0	0
7	2	sleep	1	F/N	SLE	new_crit	0	resp_new	1	3.05384	21.7203	3	0.14423	21.9429	0	0
7	2	doze	1	F/N	SLE	new_rel	0	resp_new	1	2.19788	24.7148	1	0.641197	25.4426	0	0
7	2	tired	1	F/N	SLE	new_rel	0	resp_new	1	1.6883	27.7143	1	0.938678	28.731	0	0
7	2	dress	2	f/n	BO	old_1	1	resp_old	1	2.72561	33.7679	3	0.378194	34.223	0	0
7	2	aunt	2	f/n	BO	new_rel	1	resp_new	1	1.48333	36.2819	2	0.271715	36.6364	0	0
7	2	schools	2	f/n	BO	new_unrel	1	resp_new	1	1.09019	38.3027	3	0.566042	38.9561	0	0
7	2	date	2	f/n	BO	new_rel	1	resp_new	1	1.09014	40.6224	3	0.469267	41.1791	0	0
7	2	episode	2	f/n	BO	new_unrel	1	resp_new	1	0.990888	42.7487	3	0.912604	43.742	0	0
7	2	beautiful	2	f/n	BO	old_3	1	resp_old	1	2.16854	46.4934	3	0.441961	47.0159	0	0
7	2	pretty	2	f/n	BO	old_8	1	resp_old	1	2.49709	50.0955	3	0.199449	50.3767	0	0
7	2	girl	2	f/n	BO	new_crit	1	resp_old	0	1.02031	51.9747	3	0.341181	52.4024	0	0
7	2	garbage	3	F/N	T	old_2	0	resp_old	1	2.91318	56.7996	2	0.581486	57.4588	0	0
7	2	pile	3	F/N	T	old_1	0	resp_old	1	1.48345	59.5265	2	0.602185	60.2121	0	0
7	2	can	3	F/N	T	old_12	0	resp_old	1	2.18679	62.9743	1	0.23447	63.2946	0	0
7	2	pony	3	F/N	T	new_unrel	0	resp_new	1	1.3186	65.1905	3	1.10007	66.3732	0	0
7	2	scholar	3	F/N	T	new_unrel	0	resp_new	1	0.932097	67.8891	3	0.338355	68.308	0	0
7	2	trash	3	F/N	T	new_crit	0	resp_new	1	1.78162	70.6698	3	0.287501	71.0361	0	0
7	2	landfill	3	F/N	T	new_rel	0	resp_new	1	2.24454	73.8646	1	0.239265	74.1908	0	0
7	2	scraps	3	F/N	T	new_rel	0	resp_new	1	0.90345	75.6793	1	0.697609	76.4625	0	0
7	2	fierce	4	f/N	L	old_5	0	resp_old	1	2.86072	81.0043	2	0.270428	81.3578	0	0
7	2	roar	4	f/N	L	new_rel	0	resp_old	0	0.985374	82.9206	2	0.237047	83.2438	0	0
7	2	jungle	4	f/N	L	old_12	0	resp_old	1	1.63586	85.4551	1	0.176458	85.7149	0	0
7	2	number	4	f/N	L	new_unrel	0	resp_new	1	0.98462	87.2767	2	1.04209	88.4057	0	0
7	2	cage	4	f/N	L	new_rel	0	resp_new	1	1.49459	90.4832	1	0.327842	90.8943	0	0
7	2	lion	4	f/N	L	new_crit	0	resp_new	1	1.69398	93.1672	3	0.373934	93.6252	0	0
7	2	bears	4	f/N	L	old_1	0	resp_old	1	1.4361	95.6412	3	0.591935	96.316	0	0
7	2	cousin	4	f/N	L	new_unrel	0	resp_new	1	1.57695	98.4668	3	1.7922	100.342	0	0
7	2	sniff	5	F/n	NO	old_5	2	resp_old	1	2.09301	104.14	2	0.240751	104.467	0	0
7	2	nostril	5	F/n	NO	old_1	2	resp_old	1	2.42082	107.471	3	1.02028	108.579	0	0
7	2	barrel	5	F/n	NO	new_unrel	2	resp_new	1	2.09213	111.252	2	0.320922	111.659	0	0
7	2	stench	5	F/n	NO	new_rel	2	resp_old	0	1.61778	113.851	2	2.0474	115.976	0	0
7	2	hear	5	F/n	NO	new_rel	2	resp_new	1	1.85256	118.407	2	1.37078	119.857	0	0
7	2	scent	5	F/n	NO	old_10	2	resp_old	1	1.35977	121.8	3	0.481764	122.371	0	0
7	2	servant	5	F/n	NO	new_unrel	2	resp_new	1	1.22503	124.174	3	0.461913	124.718	0	0
7	2	smell	5	F/n	NO	new_crit	2	resp_old	0	2.60788	127.9	1	0.358656	128.335	0	0
7	2	marines	6	f/N	AR	old_10	0	resp_new	0	3.39324	133.278	1	0.266185	133.624	0	0
7	2	air force	6	f/N	AR	old_1	0	resp_old	1	1.11398	135.32	3	0.50084	135.908	0	0
7	2	march	6	f/N	AR	new_rel	0	resp_new	1	1.34949	137.84	2	0.594628	138.521	0	0
7	2	freckle	6	f/N	AR	new_unrel	0	resp_new	1	1.31874	140.423	3	0.424335	140.93	0	0
7	2	crystal	6	f/N	AR	new_unrel	0	resp_new	1	1.48336	142.99	3	0.328337	143.401	0	0
7	2	army	6	f/N	AR	new_crit	0	resp_new	1	1.86448	145.844	3	0.63742	146.56	0	0
7	2	infantry	6	f/N	AR	new_rel	0	resp_new	1	2.71415	149.849	1	2.00563	151.943	0	0
7	2	combat	6	f/N	AR	old_6	0	resp_new	0	1.19564	153.724	1	0.300806	154.113	0	0
7	3	toe	1	f/N	FO	old_11	0	resp_old	1	3.76281	10.9353	2	1.55582	12.5671	0	0
7	3	yard	1	f/N	FO	old_5	0	resp_old	1	1.72369	14.8663	3	0.369362	15.3136	0	0
7	3	movie	1	f/N	FO	new_unrel	0	resp_new	1	1.45985	17.3579	3	0.826765	18.2674	0	0
7	3	kick	1	f/N	FO	new_rel	0	resp_new	1	1.82901	20.6709	2	0.924372	21.6738	0	0
7	3	south	1	f/N	FO	new_unrel	0	resp_old	0	4.06733	26.324	1	7.57193	33.9735	0	0
7	3	ankle	1	f/N	FO	old_1	0	resp_old	1	2.43855	36.9887	2	1.71963	38.7897	0	0
7	3	hand	1	f/N	FO	new_rel	0	resp_new	1	2.63198	41.9982	1	1.10834	43.1829	0	0
7	3	foot	1	f/N	FO	new_crit	0	resp_new	1	3.24149	46.9999	3	0.469733	47.5488	0	0
7	3	highway	2	f/N	C	old_7	0	resp_new	0	6.99177	56.0491	3	1.13174	57.266	0	0
7	3	moisture	2	f/N	C	new_unrel	0	resp_new	1	1.3895	59.2312	3	0.709613	60.0233	0	0
7	3	partner	2	f/N	C	new_unrel	0	resp_new	1	3.95615	64.5533	3	0.774712	65.4108	0	0
7	3	train	2	f/N	C	old_6	0	resp_new	0	3.40565	69.3959	3	0.703291	70.179	0	0
7	3	jeep	2	f/N	C	new_rel	0	resp_new	1	7.75899	78.5182	2	1.67094	80.2733	0	0
7	3	garage	2	f/N	C	new_rel	0	resp_new	1	3.93235	84.7838	1	0.48725	85.3541	0	0
7	3	sedan	2	f/N	C	old_1	0	resp_old	1	1.46569	87.4033	3	0.429025	87.9092	0	0
7	3	car	2	f/N	C	new_crit	0	resp_new	1	1.57686	90.0697	3	0.365785	90.5189	0	0
7	3	fight	3	F/n	M	old_1	1	resp_old	1	2.08652	93.9707	3	0.331028	94.3818	0	0
7	3	wrath	3	F/n	M	old_10	1	resp_new	0	1.5829	96.5404	2	0.785937	97.4037	0	0
7	3	enrage	3	F/n	M	old_6	1	resp_old	1	1.82274	99.8065	3	0.320422	100.212	0	0
7	3	hatred	3	F/n	M	new_rel	1	resp_old	0	2.08707	102.873	1	1.30923	104.262	0	0
7	3	happy	3	F/n	M	new_rel	1	resp_new	1	1.44213	106.279	2	0.826474	107.194	0	0
7	3	anger	3	F/n	M	new_crit	1	resp_old	0	3.65141	111.42	2	0.868009	112.37	0	0
7	3	dinner	3	F/n	M	new_unrel	1	resp_new	1	1.69444	114.645	2	0.585356	115.314	0	0
7	3	earthworm	3	F/n	M	new_unrel	1	resp_new	1	1.84096	117.735	3	0.375651	118.189	0	0
7	3	cake	4	F/n	HON	old_1	1	resp_old	1	1.8992	121.632	3	0.345768	122.057	0	0
7	3	good	4	F/n	HON	new_rel	1	resp_old	0	2.24509	124.886	2	0.718328	125.691	0	0
7	3	city	4	F/n	HON	new_unrel	1	resp_new	1	1.10206	127.37	3	1.16386	128.621	0	0
7	3	sugar	4	F/n	HON	new_rel	1	resp_new	1	1.62953	130.83	1	0.852825	131.76	0	0
7	3	pie	4	F/n	HON	old_2	1	resp_old	1	1.50643	133.851	2	2.61146	136.545	0	0
7	3	alligator	4	F/n	HON	new_unrel	1	resp_new	1	1.22535	138.35	1	0.343241	138.775	0	0
7	3	tooth	4	F/n	HON	old_12	1	resp_old	1	3.48191	142.832	2	2.17697	145.095	0	0
7	3	sweet	4	F/n	HON	new_crit	1	resp_old	0	1.28416	146.958	2	0.82165	147.861	0	0
7	3	vegetable	5	f/n	A	old_1	1	resp_old	1	3.57534	152.852	3	1.23076	154.17	0	0
7	3	berry	5	f/n	A	new_rel	1	resp_new	1	1.24297	155.996	2	0.697537	156.769	0	0
7	3	orange	5	f/n	A	old_2	1	resp_new	0	1.56486	158.908	1	1.50628	160.498	0	0
7	3	player	5	f/n	A	new_unrel	1	resp_new	1	1.23686	162.313	2	0.547951	162.943	0	0
7	3	journal	5	f/n	A	new_unrel	1	resp_new	1	1.10246	164.628	2	2.51986	167.234	0	0
7	3	juice	5	f/n	A	old_10	1	resp_old	1	1.35991	169.171	3	0.493585	169.742	0	0
7	3	pear	5	f/n	A	new_rel	1	resp_new	1	2.28577	172.605	2	0.774533	173.461	0	0
7	3	fruit	5	f/n	A	new_crit	1	resp_old	0	2.27433	176.315	2	0.690785	177.086	0	0
7	3	frame	6	F/n	D	old_1	1	resp_old	1	3.20064	181.763	3	0.861715	182.709	0	0
7	3	chapter	6	F/n	D	new_unrel	1	resp_new	1	1.45377	184.738	2	2.15657	186.972	0	0
7	3	shutter	6	F/n	D	old_2	1	resp_old	1	1.3597	188.906	3	0.448547	189.432	0	0
7	3	house	6	F/n	D	new_rel	1	resp_new	1	2.12765	192.135	1	0.487183	192.709	0	0
7	3	sash	6	F/n	D	new_rel	1	resp_new	1	1.38966	194.671	2	0.346595	195.101	0	0
7	3	mayor	6	F/n	D	new_unrel	1	resp_new	1	1.05539	196.74	3	0.996308	197.823	0	0
7	3	window	6	F/n	D	new_crit	1	resp_old	0	2.321	200.725	2	0.334872	201.141	0	0
7	3	shade	6	F/n	D	old_11	1	resp_old	1	2.09262	203.817	1	0.257936	204.161	0	0
7	4	blouse	1	f/N	SHI	old_1	0	resp_old	1	1.67628	4.94158	3	0.323143	5.34297	0	0
7	4	belt	1	f/N	SHI	old_4	0	resp_new	0	1.71174	7.63825	2	0.100538	7.81694	0	0
7	4	collar	1	f/N	SHI	old_8	0	resp_new	0	0.961839	9.36117	2	0.340601	9.78794	0	0
7	4	piano	1	f/N	SHI	new_unrel	0	resp_new	1	1.37755	11.7433	3	0.129303	11.9553	0	0
7	4	voltage	1	f/N	SHI	new_unrel	0	resp_new	1	1.12523	13.6577	3	0.70347	14.4488	0	0
7	4	pocket	1	f/N	SHI	new_rel	0	resp_new	1	0.844043	15.8729	2	0.668737	16.6278	0	0
7	4	shirt	1	f/N	SHI	new_crit	0	resp_new	1	1.65921	18.8665	3	0.211379	19.1614	0	0
7	4	pants	1	f/N	SHI	new_rel	0	resp_new	1	1.67085	21.4098	1	0.0942462	21.5885	0	0
7	4	throne	2	f/n	QU	old_11	1	resp_old	1	1.70603	25.049	1	0.123423	25.2563	0	0
7	4	George	2	f/n	QU	new_rel	1	resp_new	1	1.17265	27.0112	2	0.785773	27.8843	0	0
7	4	palace	2	f/n	QU	old_2	1	resp_old	1	1.03734	29.5018	2	0.249753	29.8329	0	0
7	4	rule	2	f/n	QU	old_1	1	resp_old	1	2.23355	32.6409	3	0.205767	32.9329	0	0
7	4	oven	2	f/n	QU	new_unrel	1	resp_new	1	1.07926	34.5953	2	3.33388	38.0157	0	0
7	4	king	2	f/n	QU	new_crit	1	resp_new	1	1.49514	40.0864	1	0.756195	40.9253	0	0
7	4	yellow	2	f/n	QU	new_unrel	1	resp_new	1	3.21232	44.7121	2	0.625247	45.4221	0	0
7	4	dictator	2	f/n	QU	new_rel	1	resp_new	1	1.44208	47.44	3	0.480662	48.0094	0	0
7	4	frigid	3	F/n	H	old_11	2	resp_old	1	3.70059	53.3959	1	0.584817	54.0601	0	0
7	4	frost	3	F/n	H	new_rel	2	resp_old	0	1.07262	55.7137	1	0.186251	55.9812	0	0
7	4	shiver	3	F/n	H	new_rel	2	resp_new	1	0.926024	57.4864	2	0.492467	58.0655	0	0
7	4	ice	3	F/n	H	old_1	2	resp_old	1	0.955373	59.6	3	0.687788	60.3686	0	0
7	4	money	3	F/n	H	new_unrel	2	resp_new	1	1.25445	62.207	2	0.924716	63.2079	0	0
7	4	wet	3	F/n	H	old_3	2	resp_old	1	0.996843	64.7873	3	0.2397	65.1134	0	0
7	4	dandruff	3	F/n	H	new_unrel	2	resp_new	1	1.06725	66.7653	3	1.27837	68.1304	0	0
7	4	cold	3	F/n	H	new_crit	2	resp_old	0	1.13702	69.8495	2	0.886194	70.8115	0	0
7	4	table	4	F/n	TA	old_1	1	resp_old	1	2.02813	75.91	3	0.338343	76.328	0	0
7	4	helmet	4	F/n	TA	new_unrel	1	resp_new	1	1.80504	78.7131	2	1.58036	80.3725	0	0
7	4	bench	4	F/n	TA	old_2	1	resp_new	0	3.56969	84.5167	1	1.83666	86.4341	0	0
7	4	seat	4	F/n	TA	old_10	1	resp_old	1	1.53051	88.5418	1	0.498273	89.1228	0	0
7	4	legs	4	F/n	TA	new_rel	1	resp_new	1	1.93398	91.6301	2	0.475087	92.1848	0	0
7	4	poem	4	F/n	TA	new_unrel	1	resp_new	1	1.21355	93.9712	3	0.285472	94.3385	0	0
7	4	rocking	4	F/n	TA	new_rel	1	resp_new	1	1.27189	96.1845	3	0.363065	96.6298	0	0
7	4	chair	4	F/n	TA	new_crit	1	resp_old	0	1.84623	99.055	2	2.46132	101.601	0	0
7	4	ink	5	f/n	W	old_6	1	resp_old	1	4.51886	107.733	3	0.211593	108.03	0	0
7	4	death	5	f/n	W	new_rel	1	resp_new	1	1.75898	110.366	2	0.308732	110.753	0	0
7	4	cauliflowe	5	f/n	W	new_unrel	1	resp_new	1	1.13777	112.477	3	0.287241	112.851	0	0
7	4	cat	5	f/n	W	old_12	1	resp_new	0	1.12026	114.544	3	0.299014	114.924	0	0
7	4	white	5	f/n	W	old_1	1	resp_old	1	1.46506	116.973	3	2.54978	119.6	0	0
7	4	grief	5	f/n	W	new_rel	1	resp_new	1	1.07899	121.261	3	0.398577	121.747	0	0
7	4	thermomete	5	f/n	W	new_unrel	1	resp_new	1	1.24286	123.568	3	0.257926	123.914	0	0
7	4	black	5	f/n	W	new_crit	1	resp_old	0	1.66447	126.157	2	0.263781	126.499	0	0
7	4	billows	6	F/N	SM	old_9	0	resp_old	1	2.46139	130.369	3	0.256817	130.708	0	0
7	4	fire	6	F/N	SM	new_rel	0	resp_old	0	1.36619	132.653	1	0.639578	133.374	0	0
7	4	mathematic	6	F/N	SM	new_unrel	0	resp_new	1	1.07832	135.038	3	1.23693	136.362	0	0
7	4	jewel	6	F/N	SM	new_unrel	0	resp_new	1	1.14357	138.082	2	0.830153	138.993	0	0
7	4	ashes	6	F/N	SM	old_1	0	resp_old	1	1.52391	141.1	3	0.569019	141.747	0	0
7	4	cigarette	6	F/N	SM	new_rel	0	resp_old	0	2.97711	145.309	2	0.223151	145.617	0	0
7	4	smoke	6	F/N	SM	new_crit	0	resp_new	1	2.509	148.703	3	0.457399	149.242	0	0
7	4	flames	6	F/N	SM	old_2	0	resp_old	1	1.52407	151.345	1	0.552755	151.975	0	0
8	1	dolls	1	f/n	BO	old_6	1	resp_old	1	6.61388	9.58033	3	3.25959	12.928	0	0
8	1	aunt	1	f/n	BO	old_7	1	resp_old	1	2.46203	15.9814	3	1.92427	17.9888	0	0
8	1	episode	1	f/n	BO	new_unrel	1	resp_new	1	2.93852	21.5083	2	3.01414	24.6089	0	0
8	1	young	1	f/n	BO	new_rel	1	resp_new	1	4.87035	30.063	1	1.52567	31.6755	0	0
8	1	schools	1	f/n	BO	new_unrel	1	resp_new	1	1.39546	33.6507	3	0.921153	34.6556	0	0
8	1	girl	1	f/n	BO	new_crit	1	resp_old	0	3.85661	39.0968	2	1.65558	40.8403	0	0
8	1	sister	1	f/n	BO	old_1	1	resp_old	1	1.82853	43.2519	3	0.968024	44.2969	0	0
8	1	hair	1	f/n	BO	new_rel	1	resp_new	1	1.49492	46.3696	2	2.14063	48.5877	0	0
8	1	riders	2	F/N	ROU	old_11	0	resp_new	0	4.52452	57.7544	1	0.998045	58.8386	0	0
8	1	ground	2	F/N	ROU	old_5	0	resp_old	1	6.1547	65.581	1	0.973098	66.6359	0	0
8	1	sparrow	2	F/N	ROU	new_unrel	0	resp_new	1	1.38315	68.605	2	1.88637	70.5741	0	0
8	1	jagged	2	F/N	ROU	old_1	0	resp_old	1	1.50649	72.6594	3	0.704053	73.4427	0	0
8	1	sand	2	F/N	ROU	new_rel	0	resp_old	0	1.45931	75.4773	2	0.780877	76.3446	0	0
8	1	agent	2	F/N	ROU	new_unrel	0	resp_new	1	1.37022	78.2932	3	1.21095	79.5864	0	0
8	1	gravel	2	F/N	ROU	new_rel	0	resp_old	0	1.69456	81.8556	2	1.07349	83.0069	0	0
8	1	rough	2	F/N	ROU	new_crit	0	resp_old	0	2.28621	85.872	1	0.781285	86.7391	0	0
8	1	shiver	3	F/n	H	old_12	2	resp_old	1	2.43871	91.7146	2	0.938872	92.7333	0	0
8	1	money	3	F/n	H	new_unrel	2	resp_new	1	2.99602	96.3096	2	1.52308	97.9149	0	0
8	1	warm	3	F/n	H	old_1	2	resp_old	1	1.47174	99.969	3	0.674406	100.731	0	0
8	1	chilly	3	F/n	H	old_2	2	resp_old	1	1.17804	102.487	3	0.839132	103.414	0	0
8	1	winter	3	F/n	H	new_rel	2	resp_new	1	2.7025	106.69	2	1.12658	107.899	0	0
8	1	dandruff	3	F/n	H	new_unrel	2	resp_new	1	1.2136	109.705	2	1.82462	111.609	0	0
8	1	freeze	3	F/n	H	new_rel	2	resp_old	0	3.61037	115.793	2	0.556935	116.431	0	0
8	1	cold	3	F/n	H	new_crit	2	resp_old	0	1.74716	118.755	2	0.3161	119.149	0	0
8	1	raised	4	f/n	BA	old_10	1	resp_new	0	5.08714	126.451	2	1.90531	128.44	0	0
8	1	symbol	4	f/n	BA	old_5	1	resp_old	1	2.25677	131.283	3	0.565821	131.938	0	0
8	1	banner	4	f/n	BA	old_1	1	resp_old	1	1.11937	133.637	3	1.41255	135.13	0	0
8	1	penalty	4	f/n	BA	new_unrel	1	resp_new	1	1.31343	137.029	2	2.50154	139.617	0	0
8	1	stars	4	f/n	BA	new_rel	1	resp_new	1	2.72573	142.919	2	0.926786	143.932	0	0
8	1	flag	4	f/n	BA	new_crit	1	resp_old	0	1.1958	145.707	2	2.05159	147.842	0	0
8	1	stripes	4	f/n	BA	new_rel	1	resp_new	1	2.09302	150.508	2	2.12735	152.715	0	0
8	1	beach	4	f/n	BA	new_unrel	1	resp_new	1	2.97759	156.27	3	1.08879	157.446	0	0
8	1	polo	5	f/N	SHI	old_1	0	resp_old	1	2.10407	161.62	3	0.780069	162.481	0	0
8	1	voltage	5	f/N	SHI	new_unrel	0	resp_new	1	1.23669	164.297	3	0.674366	165.054	0	0
8	1	sleeves	5	f/N	SHI	new_rel	0	resp_old	0	4.49007	170.122	1	0.721182	170.924	0	0
8	1	piano	5	f/N	SHI	new_unrel	0	resp_new	1	1.36591	172.875	3	0.979097	173.94	0	0
8	1	vest	5	f/N	SHI	old_11	0	resp_old	1	1.42418	175.944	2	1.28892	177.315	0	0
8	1	cuffs	5	f/N	SHI	old_4	0	resp_old	1	1.16661	179.058	3	0.21768	179.362	0	0
8	1	shirt	5	f/N	SHI	new_crit	0	resp_old	0	5.1751	185.119	1	21.3327	206.54	0	0
8	1	linen	5	f/N	SHI	new_rel	0	resp_new	1	2.26814	209.383	2	1.10462	210.565	0	0
8	1	leader	6	f/n	QU	old_8	1	resp_old	1	4.26058	217.159	1	4.71246	221.955	0	0
8	1	rule	6	f/n	QU	old_1	1	resp_old	1	3.06512	225.598	3	1.06203	226.74	0	0
8	1	yellow	6	f/n	QU	new_unrel	1	resp_new	1	1.0024	228.319	2	1.10677	229.503	0	0
8	1	prince	6	f/n	QU	new_rel	1	resp_new	1	1.69416	231.783	3	1.06751	232.928	0	0
8	1	oven	6	f/n	QU	new_unrel	1	resp_new	1	1.28957	234.803	3	0.827212	235.713	0	0
8	1	England	6	f/n	QU	new_rel	1	resp_new	1	1.70035	237.998	3	1.19419	239.278	0	0
8	1	queen	6	f/n	QU	old_6	1	resp_old	1	2.063	241.919	3	1.45296	243.454	0	0
8	1	king	6	f/n	QU	new_crit	1	resp_new	1	1.32628	245.353	2	0.825002	246.265	0	0
8	2	cocktail	1	f/n	A	old_4	1	resp_old	1	3.38163	5.56851	3	0.996536	6.6481	0	0
8	2	pear	1	f/n	A	new_rel	1	resp_new	1	2.0689	9.29287	2	1.05749	10.4269	0	0
8	2	player	1	f/n	A	new_unrel	1	resp_new	1	1.24869	12.2572	3	1.55895	13.9	0	0
8	2	berry	1	f/n	A	new_rel	1	resp_old	0	3.76851	18.2417	1	1.37754	19.7018	0	0
8	2	journal	1	f/n	A	new_unrel	1	resp_new	1	1.59489	21.878	2	0.903264	22.8655	0	0
8	2	fruit	1	f/n	A	new_crit	1	resp_new	1	6.46452	29.9059	2	1.35736	31.3416	0	0
8	2	salad	1	f/n	A	old_8	1	resp_old	1	1.29563	33.2121	3	0.35883	33.6478	0	0
8	2	vegetable	1	f/n	A	old_1	1	resp_old	1	2.87776	37.0996	2	0.511271	37.6914	0	0
8	2	nose	2	F/n	NO	old_11	1	resp_old	1	2.04007	42.6982	3	0.903854	43.6808	0	0
8	2	nostril	2	F/n	NO	new_rel	1	resp_new	1	1.42412	45.6802	2	1.00637	46.7682	0	0
8	2	see	2	F/n	NO	new_rel	1	resp_new	1	6.46588	53.8135	3	0.939704	54.8302	0	0
8	2	barrel	2	F/n	NO	new_unrel	1	resp_new	1	2.11642	57.5261	3	0.882659	58.491	0	0
8	2	hear	2	F/n	NO	old_6	1	resp_old	1	1.33127	60.4055	3	1.63485	62.1216	0	0
8	2	smell	2	F/n	NO	new_crit	1	resp_old	0	1.98676	64.6855	2	0.611798	65.3761	0	0
8	2	servant	2	F/n	NO	new_unrel	1	resp_new	1	1.18986	67.1401	2	0.844284	68.0738	0	0
8	2	salts	2	F/n	NO	old_1	1	resp_old	1	2.21587	70.8712	3	0.432696	71.3801	0	0
8	2	lid	3	F/N	CU	old_1	0	resp_old	1	1.24831	74.5418	3	0.534992	75.161	0	0
8	2	bullet	3	F/N	CU	new_unrel	0	resp_new	1	1.22557	76.971	3	1.07412	78.1254	0	0
8	2	fabric	3	F/N	CU	new_unrel	0	resp_new	1	1.30179	80.0047	2	0.675774	80.7646	0	0
8	2	drink	3	F/N	CU	new_rel	0	resp_old	0	2.85079	84.1922	1	0.680738	84.9538	0	0
8	2	handle	3	F/N	CU	new_rel	0	resp_new	1	1.80005	87.3391	2	0.744538	88.1625	0	0
8	2	mug	3	F/N	CU	old_6	0	resp_old	1	1.24298	89.9802	3	0.91802	90.9744	0	0
8	2	cup	3	F/N	CU	new_crit	0	resp_new	1	3.03073	94.5796	3	1.14895	95.8161	0	0
8	2	goblet	3	F/N	CU	old_7	0	resp_old	1	1.35457	97.754	3	1.04349	98.8821	0	0
8	2	blaze	4	F/N	SM	old_11	0	resp_old	1	1.26687	101.957	2	11.5654	113.602	0	0
8	2	flames	4	F/N	SM	old_1	0	resp_old	1	2.18629	116.376	2	1.63702	118.092	0	0
8	2	tobacco	4	F/N	SM	new_rel	0	resp_new	1	2.40894	121.076	2	0.936707	122.095	0	0
8	2	jewel	4	F/N	SM	new_unrel	0	resp_new	1	1.25488	123.933	3	0.902912	124.913	0	0
8	2	stain	4	F/N	SM	new_rel	0	resp_new	1	2.04537	127.535	2	0.931313	128.553	0	0
8	2	smoke	4	F/N	SM	new_crit	0	resp_new	1	2.02236	131.15	3	0.821324	132.054	0	0
8	2	mathematic	4	F/N	SM	new_unrel	0	resp_new	1	1.13147	133.763	3	0.707986	134.553	0	0
8	2	fire	4	F/N	SM	old_2	0	resp_old	1	1.94615	137.083	2	1.76763	138.93	0	0
8	2	fierce	5	f/N	L	old_8	0	resp_old	1	2.7429	143.357	2	0.393438	143.833	0	0
8	2	number	5	f/N	L	new_unrel	0	resp_new	1	0.850711	145.263	3	2.23075	147.575	0	0
8	2	pride	5	f/N	L	old_1	0	resp_old	1	0.973084	149.129	3	1.04747	150.257	0	0
8	2	bears	5	f/N	L	new_rel	0	resp_new	1	1.57648	152.411	2	1.54738	154.035	0	0
8	2	den	5	f/N	L	old_3	0	resp_old	1	1.52462	156.131	3	1.8638	158.082	0	0
8	2	Africa	5	f/N	L	new_rel	0	resp_new	1	1.24295	159.9	2	0.957048	160.933	0	0
8	2	lion	5	f/N	L	new_crit	0	resp_new	1	1.76491	163.274	3	1.96864	165.33	0	0
8	2	cousin	5	f/N	L	new_unrel	0	resp_new	1	2.60303	168.509	2	0.757756	169.356	0	0
8	2	legs	6	F/n	TA	old_1	1	resp_old	1	0.926732	171.95	3	0.835986	172.872	0	0
8	2	wood	6	F/n	TA	new_rel	1	resp_new	1	0.897411	174.346	2	0.63406	175.069	0	0
8	2	recliner	6	F/n	TA	new_rel	1	resp_new	1	1.26066	176.908	2	0.48127	177.474	0	0
8	2	rocking	6	F/n	TA	old_11	1	resp_new	0	1.14306	179.202	2	0.589052	179.874	0	0
8	2	helmet	6	F/n	TA	new_unrel	1	resp_new	1	0.996809	181.455	2	0.615748	182.153	0	0
8	2	poem	6	F/n	TA	new_unrel	1	resp_new	1	0.821037	183.558	2	0.337767	183.98	0	0
8	2	swivel	6	F/n	TA	old_5	1	resp_old	1	1.04362	185.606	3	0.699136	186.394	0	0
8	2	chair	6	F/n	TA	new_crit	1	resp_old	0	4.57145	191.546	1	0.634723	192.26	0	0
8	3	coal	1	f/n	W	old_10	0	resp_new	0	4.26143	7.44437	1	0.95058	8.4777	0	0
8	3	bottom	1	f/n	W	new_rel	0	resp_new	1	1.96357	11.0231	1	0.451493	11.5632	0	0
8	3	funeral	1	f/n	W	new_rel	0	resp_old	0	1.79406	13.9318	2	0.400536	14.4172	0	0
8	3	thermomete	1	f/n	W	new_unrel	0	resp_new	1	1.14332	16.1461	2	3.88439	20.1132	0	0
8	3	charred	1	f/n	W	old_1	0	resp_old	1	0.991355	21.6842	3	0.539981	22.3122	0	0
8	3	cat	1	f/n	W	old_6	0	resp_old	1	1.29599	24.1876	2	1.04668	25.3108	0	0
8	3	cauliflowe	1	f/n	W	new_unrel	0	resp_new	1	1.1254	27.0153	2	1.02521	28.1277	0	0
8	3	black	1	f/n	W	new_crit	0	resp_new	1	1.77622	30.4778	1	0.884027	31.4379	0	0
8	3	small	2	f/n	WE	old_10	1	resp_new	0	2.2039	35.5295	1	0.862161	36.4798	0	0
8	3	feelers	2	f/n	WE	old_1	1	resp_old	1	1.17242	38.2292	3	0.885761	39.1952	0	0
8	3	web	2	f/n	WE	old_4	1	resp_old	1	2.12768	41.9037	3	0.780995	42.7691	0	0
8	3	bridge	2	f/n	WE	new_unrel	1	resp_new	1	2.77201	46.1193	2	0.607731	46.806	0	0
8	3	tarantula	2	f/n	WE	new_rel	1	resp_new	1	1.37135	48.7556	1	0.720696	49.5574	0	0
8	3	bite	2	f/n	WE	new_rel	1	resp_new	1	1.96412	52.1068	2	0.830224	53.025	0	0
8	3	organ	2	f/n	WE	new_unrel	1	resp_new	1	1.7178	55.3251	2	1.08697	56.4933	0	0
8	3	spider	2	f/n	WE	new_crit	1	resp_old	0	6.61694	63.6889	1	1.79528	65.5701	0	0
8	3	screen	3	F/n	D	old_8	1	resp_old	1	1.19669	69.5555	3	0.564724	70.2028	0	0
8	3	sill	3	F/n	D	old_2	1	resp_old	1	1.04399	71.8281	3	0.801715	72.7052	0	0
8	3	chapter	3	F/n	D	new_unrel	1	resp_new	1	1.01481	74.3041	2	1.13809	75.5201	0	0
8	3	pane	3	F/n	D	new_rel	1	resp_old	0	1.71153	77.8126	2	0.945122	78.8452	0	0
8	3	mayor	3	F/n	D	new_unrel	1	resp_new	1	1.34809	80.7672	3	0.737777	81.5828	0	0
8	3	shade	3	F/n	D	old_1	1	resp_old	1	1.2607	83.4249	2	1.58304	85.0932	0	0
8	3	shutter	3	F/n	D	new_rel	1	resp_old	0	1.16096	86.8299	2	0.75187	87.6601	0	0
8	3	window	3	F/n	D	new_crit	1	resp_old	0	14.9905	103.231	1	1.51415	104.826	2	1
8	3	jeep	4	f/N	C	old_1	0	resp_old	1	2.46815	108.978	3	0.720917	109.776	0	0
8	3	automobile	4	f/N	C	new_rel	0	resp_new	1	5.56753	115.929	2	0.826699	116.838	0	0
8	3	taxi	4	f/N	C	old_9	0	resp_old	1	1.17302	118.584	3	0.60799	119.271	0	0
8	3	partner	4	f/N	C	new_unrel	0	resp_new	1	2.01042	121.86	2	0.742887	122.684	0	0
8	3	Ford	4	f/N	C	old_5	0	resp_old	1	1.08484	124.345	3	0.55092	124.984	0	0
8	3	truck	4	f/N	C	new_rel	0	resp_old	0	1.52999	127.096	2	0.709967	127.888	0	0
8	3	moisture	4	f/N	C	new_unrel	0	resp_new	1	1.46529	129.936	3	0.935346	130.952	0	0
8	3	car	4	f/N	C	new_crit	0	resp_new	1	2.67872	134.215	3	0.556019	134.85	0	0
8	3	pile	5	F/N	T	old_2	0	resp_old	1	2.67863	139.105	2	0.696625	139.881	0	0
8	3	scholar	5	F/N	T	new_unrel	0	resp_new	1	1.1902	141.654	3	1.22069	142.964	0	0
8	3	pony	5	F/N	T	new_unrel	0	resp_new	1	0.914231	144.457	3	0.305455	144.847	0	0
8	3	waste	5	F/N	T	new_rel	0	resp_old	0	1.54747	146.969	2	0.424013	147.471	0	0
8	3	sewage	5	F/N	T	new_rel	0	resp_new	1	1.22548	149.272	2	0.575878	149.928	0	0
8	3	trash	5	F/N	T	new_crit	0	resp_new	1	1.77054	152.282	3	0.453468	152.817	0	0
8	3	litter	5	F/N	T	old_11	0	resp_old	1	4.08551	157.476	2	0.680294	158.241	0	0
8	3	scraps	5	F/N	T	old_1	0	resp_old	1	2.42119	161.248	3	0.33456	161.667	0	0
8	3	arm	6	f/N	FO	old_1	0	resp_old	1	1.70007	164.898	3	0.76219	165.746	0	0
8	3	boot	6	f/N	FO	old_11	0	resp_old	1	1.60639	167.936	2	0.56347	168.586	0	0
8	3	movie	6	f/N	FO	new_unrel	0	resp_new	1	1.98735	171.156	3	0.498788	171.746	0	0
8	3	kick	6	f/N	FO	old_4	0	resp_old	1	0.908444	173.234	3	0.873642	174.186	0	0
8	3	toe	6	f/N	FO	new_rel	0	resp_new	1	1.319	176.083	2	0.308484	176.472	0	0
8	3	foot	6	f/N	FO	new_crit	0	resp_new	1	9.69224	186.749	3	0.897369	187.735	2	1
8	3	south	6	f/N	FO	new_unrel	0	resp_new	1	1.21356	189.53	2	0.765115	190.374	0	0
8	3	ankle	6	f/N	FO	new_rel	0	resp_old	0	1.25427	192.209	2	0.8945	193.182	0	0
8	4	toast	1	f/N	BR	old_8	0	resp_old	1	3.30554	5.31877	1	1.33802	6.73598	0	0
8	4	food	1	f/N	BR	new_rel	0	resp_new	1	1.28963	8.60647	2	1.00916	9.69854	0	0
8	4	flour	1	f/N	BR	new_rel	0	resp_old	0	1.20783	11.483	3	0.613559	12.1813	0	0
8	4	loaf	1	f/N	BR	old_1	0	resp_old	1	0.979544	13.7334	2	0.689289	14.5098	0	0
8	4	jam	1	f/N	BR	old_6	0	resp_old	1	1.30755	16.394	2	0.825105	17.2975	0	0
8	4	judge	1	f/N	BR	new_unrel	0	resp_new	1	0.949835	18.8339	3	0.821675	19.7452	0	0
8	4	model	1	f/N	BR	new_unrel	0	resp_new	1	0.956009	21.2787	3	0.316977	21.6791	0	0
8	4	bread	1	f/N	BR	new_crit	0	resp_new	1	5.5367	27.7916	3	3.04173	30.9201	2	1
8	4	pilot	2	f/N	AR	old_1	0	resp_old	1	2.90741	35.1699	3	0.527993	35.7755	0	0
8	4	soldier	2	f/N	AR	new_rel	0	resp_old	0	1.98692	38.3404	1	0.648451	39.0674	0	0
8	4	freckle	2	f/N	AR	new_unrel	0	resp_new	1	0.938088	40.583	3	0.503859	41.1749	0	0
8	4	draft	2	f/N	AR	old_3	0	resp_old	1	2.02364	43.774	2	0.930034	44.7859	0	0
8	4	military	2	f/N	AR	old_9	0	resp_old	1	2.12203	47.4837	2	0.596575	48.1703	0	0
8	4	crystal	2	f/N	AR	new_unrel	0	resp_new	1	0.797268	49.5437	3	0.252745	49.8786	0	0
8	4	army	2	f/N	AR	new_crit	0	resp_new	1	7.8588	58.3109	3	0.997902	59.3921	2	1
8	4	marines	2	f/N	AR	new_rel	0	resp_new	1	1.76506	61.7317	2	0.557143	62.376	0	0
8	4	peace	3	F/N	SLE	old_11	0	resp_old	1	1.27785	65.2555	3	1.3115	66.6484	0	0
8	4	rest	3	F/N	SLE	new_rel	0	resp_old	0	1.47135	68.7005	2	0.40546	69.1937	0	0
8	4	yawn	3	F/N	SLE	old_4	0	resp_old	1	1.41879	71.1931	3	0.652347	71.9325	0	0
8	4	snore	3	F/N	SLE	new_rel	0	resp_old	0	1.01984	73.5392	2	0.688325	74.3138	0	0
8	4	dream	3	F/N	SLE	old_1	0	resp_old	1	1.00864	75.9	1	0.316363	76.3004	0	0
8	4	shark	3	F/N	SLE	new_unrel	0	resp_new	1	0.979547	77.8564	3	0.292418	78.2354	0	0
8	4	rectangle	3	F/N	SLE	new_unrel	0	resp_new	1	0.94456	79.767	3	0.334469	80.183	0	0
8	4	sleep	3	F/N	SLE	new_crit	0	resp_new	1	6.64683	87.4148	3	1.49961	88.9971	2	1
8	4	light	4	F/N	SO	old_2	0	resp_new	0	2.35656	92.6524	2	0.723418	93.4579	0	0
8	4	loud	4	F/N	SO	old_1	0	resp_old	1	1.20205	95.2424	3	0.314421	95.6341	0	0
8	4	skin	4	F/N	SO	old_8	0	resp_old	1	11.3662	107.579	1	0.409724	108.069	2	1
8	4	canal	4	F/N	SO	new_unrel	0	resp_new	1	1.02066	109.666	3	1.9785	111.73	0	0
8	4	kitten	4	F/N	SO	new_rel	0	resp_old	0	1.47696	113.787	1	0.892821	114.762	0	0
8	4	rattlesnak	4	F/N	SO	new_unrel	0	resp_new	1	1.01472	116.376	3	0.457861	116.925	0	0
8	4	downy	4	F/N	SO	new_rel	0	resp_new	1	1.06695	118.574	2	0.424898	119.078	0	0
8	4	soft	4	F/N	SO	new_crit	0	resp_new	1	5.20685	124.859	3	0.381389	125.324	3	1
8	4	temper	5	F/n	M	old_4	1	resp_old	1	2.11078	128.853	2	0.610262	129.551	0	0
8	4	dinner	5	F/n	M	new_unrel	1	resp_new	1	1.23721	131.364	3	0.214682	131.66	0	0
8	4	emotion	5	F/n	M	new_rel	1	resp_new	1	1.46531	133.71	2	0.490869	134.282	0	0
8	4	wrath	5	F/n	M	old_1	1	resp_old	1	1.18983	136.047	3	0.316502	136.439	0	0
8	4	earthworm	5	F/n	M	new_unrel	1	resp_new	1	0.896648	137.912	3	0.357855	138.36	0	0
8	4	mad	5	F/n	M	old_11	1	resp_old	1	7.17846	146.113	2	1.60271	147.8	2	1
8	4	anger	5	F/n	M	new_crit	1	resp_old	0	1.26634	149.649	2	0.738928	150.467	0	0
8	4	mean	5	F/n	M	new_rel	1	resp_new	1	1.54805	152.596	3	1.08069	153.754	0	0
8	4	candy	6	F/n	HON	old_8	1	resp_old	1	1.03235	156.224	3	0.803765	157.115	0	0
8	4	sour	6	F/n	HON	new_rel	1	resp_new	1	1.26596	158.963	2	0.342896	159.386	0	0
8	4	bitter	6	F/n	HON	new_rel	1	resp_new	1	1.51859	161.481	3	0.67057	162.232	0	0
8	4	chocolate	6	F/n	HON	old_1	1	resp_old	1	1.78756	164.602	3	0.367661	165.061	0	0
8	4	alligator	6	F/n	HON	new_unrel	1	resp_new	1	1.12014	166.759	3	0.167987	167.007	0	0
8	4	good	6	F/n	HON	old_3	1	resp_new	0	1.15543	168.74	2	0.781491	169.606	0	0
8	4	city	6	F/n	HON	new_unrel	1	resp_new	1	0.985174	171.169	2	0.838117	172.088	0	0
8	4	sweet	6	F/n	HON	new_crit	1	resp_old	0	2.32166	174.984	3	0.725889	175.786	0	0
9	1	march	1	f/N	AR	old_7	5	resp_old	1	13.2363	21.1612	2	6.18844	27.4404	0	0
9	1	crystal	1	f/N	AR	new_unrel	5	resp_new	1	18.1887	46.204	1	5.12786	51.4216	0	0
9	1	navy	1	f/N	AR	new_rel	5	resp_new	1	8.15218	60.1534	1	4.12279	64.3572	0	0
9	1	captain	1	f/N	AR	new_rel	5	resp_old	0	15.8102	80.7532	1	1.52819	82.3667	0	0
9	1	air force	1	f/N	AR	old_1	5	resp_old	1	15.3898	98.3401	3	1.62939	100.047	0	0
9	1	freckle	1	f/N	AR	new_unrel	5	resp_new	1	6.76073	107.39	3	1.77032	109.249	0	0
9	1	war	1	f/N	AR	old_5	5	resp_old	1	11.3221	121.155	3	8.89629	130.13	0	0
9	1	army	1	f/N	AR	new_crit	5	resp_old	0	47.5378	178.246	1	16.5119	194.835	1	1
9	1	salts	2	F/N	SME	old_7	0	resp_new	0	12.9873	212.443	2	5.1343	217.66	1	1
9	1	nose	2	F/N	SME	new_rel	0	resp_new	1	14.6629	232.91	1	4.96041	237.962	0	0
9	1	hear	2	F/N	SME	old_1	0	resp_old	1	6.85697	245.395	2	1.39907	246.871	0	0
9	1	barrel	2	F/N	SME	new_unrel	0	resp_new	1	4.81208	252.268	2	1.80544	254.155	0	0
9	1	see	2	F/N	SME	new_rel	0	resp_new	1	7.06182	261.794	1	6.07711	267.958	0	0
9	1	reek	2	F/N	SME	old_2	0	resp_old	1	17.7113	286.256	2	2.14887	288.487	0	0
9	1	smell	2	F/N	SME	new_crit	0	resp_new	1	8.02352	297.087	2	2.23359	299.402	0	0
9	1	servant	2	F/N	SME	new_unrel	0	resp_new	1	11.6687	311.648	1	1.31171	313.048	0	0
9	1	apple	3	f/n	A	old_1	1	resp_old	1	12.6532	330.882	3	0.920027	331.891	0	0
9	1	kiwi	3	f/n	A	new_rel	1	resp_new	1	2.24458	334.714	3	0.862225	335.657	0	0
9	1	journal	3	f/n	A	new_unrel	1	resp_new	1	11.8361	348.072	2	0.897307	349.048	0	0
9	1	berry	3	f/n	A	old_4	1	resp_old	1	8.17202	357.792	2	5.45037	363.332	2	1
9	1	player	3	f/n	A	new_unrel	1	resp_new	1	15.3439	379.262	1	4.67679	384.019	0	0
9	1	fruit	3	f/n	A	new_crit	1	resp_old	0	4.94041	389.534	2	1.55884	391.175	0	0
9	1	ripe	3	f/n	A	old_11	1	resp_old	1	3.59302	395.35	3	0.656838	396.095	0	0
9	1	orange	3	f/n	A	new_rel	1	resp_new	1	4.36039	401.039	1	1.59486	402.711	0	0
9	1	slice	4	f/N	BR	old_8	0	resp_old	1	15.5356	422.788	1	0.937719	423.814	0	0
9	1	flour	4	f/N	BR	new_rel	0	resp_new	1	3.12408	427.513	2	2.51748	430.117	0	0
9	1	eat	4	f/N	BR	old_4	0	resp_old	1	14.651	445.347	1	1.34217	446.778	0	0
9	1	judge	4	f/N	BR	new_unrel	0	resp_old	0	17.7566	465.118	1	1.63856	466.836	0	0
9	1	milk	4	f/N	BR	new_rel	0	resp_new	1	28.0943	495.504	2	1.60606	497.196	0	0
9	1	bread	4	f/N	BR	new_crit	0	resp_new	1	19.0099	516.783	1	3.40506	520.27	2	1
9	1	model	4	f/N	BR	new_unrel	0	resp_new	1	10.0331	530.879	1	1.54174	532.504	0	0
9	1	rye	4	f/N	BR	old_1	0	resp_old	1	3.892	536.981	3	0.657172	537.727	0	0
9	1	queen	5	f/n	QU	old_5	1	resp_old	1	3.08307	545.618	3	1.15479	546.857	0	0
9	1	yellow	5	f/n	QU	new_unrel	1	resp_new	1	10.8885	558.332	2	1.24305	559.659	0	0
9	1	throne	5	f/n	QU	old_9	1	resp_old	1	6.06612	566.308	1	0.832375	567.225	0	0
9	1	crown	5	f/n	QU	new_rel	1	resp_new	1	12.6447	580.45	1	0.422575	580.955	1	1
9	1	oven	5	f/n	QU	new_unrel	1	resp_new	1	3.23493	584.766	3	0.652561	585.509	0	0
9	1	royal	5	f/n	QU	old_1	1	resp_old	1	2.69648	588.78	3	0.879019	589.745	0	0
9	1	subjects	5	f/n	QU	new_rel	1	resp_new	1	8.82643	599.147	2	2.62557	601.865	0	0
9	1	king	5	f/n	QU	new_crit	1	resp_new	1	9.88547	612.335	1	0.445772	612.869	1	1
9	1	arm	6	f/N	FO	old_10	0	resp_old	1	13.796	631.456	2	1.03167	632.575	0	0
9	1	shoe	6	f/N	FO	new_rel	0	resp_new	1	7.07187	640.228	1	2.714	643.033	2	1
9	1	knee	6	f/N	FO	new_rel	0	resp_old	0	3.24176	646.857	3	0.8733	647.813	0	0
9	1	toe	6	f/N	FO	old_6	0	resp_old	1	2.01596	650.411	3	0.522009	651.015	0	0
9	1	kick	6	f/N	FO	old_1	0	resp_old	1	3.51708	655.108	2	0.527511	655.715	0	0
9	1	foot	6	f/N	FO	new_crit	0	resp_new	1	5.76711	662.067	3	0.610435	662.761	0	0
9	1	south	6	f/N	FO	new_unrel	0	resp_new	1	6.87446	670.209	1	0.961173	671.259	0	0
9	1	movie	6	f/N	FO	new_unrel	0	resp_new	1	3.83595	675.675	2	0.909151	676.672	0	0
9	2	dark	1	f/N	BLA	old_3	0	resp_old	1	4.20826	7.30525	3	0.920288	8.3122	0	0
9	2	grey	1	f/N	BLA	old_9	0	resp_new	0	2.26824	11.1584	2	1.1494	12.3939	0	0
9	2	charred	1	f/N	BLA	new_rel	0	resp_new	1	2.93029	15.9013	2	1.14921	17.1309	0	0
9	2	thermomete	1	f/N	BLA	new_unrel	0	resp_new	1	2.1165	19.8248	3	0.926054	20.8317	0	0
9	2	funeral	1	f/N	BLA	old_1	0	resp_old	1	1.79969	23.2178	3	0.568628	23.8703	0	0
9	2	black	1	f/N	BLA	new_crit	0	resp_new	1	10.776	35.2334	1	0.551241	35.8672	1	1
9	2	cauliflowe	1	f/N	BLA	new_unrel	0	resp_new	1	2.41475	38.858	3	1.27823	40.2185	0	0
9	2	death	1	f/N	BLA	new_rel	0	resp_old	0	8.04668	48.8419	1	0.651841	49.5803	0	0
9	2	blaze	2	F/n	CI	old_12	2	resp_old	1	6.22969	58.654	3	1.61743	60.3485	0	0
9	2	stink	2	F/n	CI	new_rel	2	resp_new	1	9.89044	70.8189	2	3.63973	74.5421	1	1
9	2	chimney	2	F/n	CI	new_rel	2	resp_old	0	2.92454	78.0505	2	2.01665	80.1534	0	0
9	2	mathematic	2	F/n	CI	new_unrel	2	resp_new	1	2.77296	83.5066	2	0.668159	84.2556	0	0
9	2	pipe	2	F/n	CI	old_1	2	resp_new	0	4.48913	89.3179	1	0.848972	90.2438	0	0
9	2	smoke	2	F/n	CI	new_crit	2	resp_old	0	2.47924	93.3009	1	0.926597	94.3167	0	0
9	2	stain	2	F/n	CI	old_2	2	resp_old	1	6.73967	101.643	1	1.80518	103.529	0	0
9	2	jewel	2	F/n	CI	new_unrel	2	resp_new	1	4.33716	108.444	1	0.727438	109.257	0	0
9	2	sour	3	F/N	SW	old_12	0	resp_old	1	7.41364	119.039	2	0.985356	120.102	0	0
9	2	sugar	3	F/N	SW	new_rel	0	resp_new	1	5.12258	125.809	1	0.668427	126.563	0	0
9	2	city	3	F/N	SW	new_unrel	0	resp_new	1	2.70825	129.858	2	0.756366	130.703	0	0
9	2	heart	3	F/N	SW	old_1	0	resp_old	1	1.87548	133.164	3	1.31947	134.562	0	0
9	2	taste	3	F/N	SW	old_2	0	resp_old	1	5.19491	140.336	2	2.47342	142.894	1	1
9	2	nice	3	F/N	SW	new_rel	0	resp_new	1	15.5406	159.014	1	0.369393	159.467	1	1
9	2	alligator	3	F/N	SW	new_unrel	0	resp_old	0	4.87031	164.924	2	1.1018	166.107	0	0
9	2	sweet	3	F/N	SW	new_crit	0	resp_new	1	8.5504	175.239	3	0.65123	175.973	0	0
9	2	fury	4	F/n	M	old_4	2	resp_old	1	3.78607	181.719	3	0.627306	182.427	0	0
9	2	hate	4	F/n	M	new_rel	2	resp_old	0	3.06544	186.078	1	0.475535	186.642	0	0
9	2	calm	4	F/n	M	new_rel	2	resp_new	1	2.02853	189.25	2	0.65117	189.985	0	0
9	2	enrage	4	F/n	M	old_12	2	resp_old	1	3.18835	193.749	2	1.83511	195.663	0	0
9	2	temper	4	F/n	M	old_1	2	resp_new	0	7.4152	203.655	1	0.697954	204.443	0	0
9	2	dinner	4	F/n	M	new_unrel	2	resp_new	1	3.56972	208.599	2	0.885766	209.568	0	0
9	2	anger	4	F/n	M	new_crit	2	resp_new	1	16.0691	226.221	1	1.51268	227.817	0	0
9	2	earthworm	4	F/n	M	new_unrel	2	resp_new	1	2.14512	230.547	2	0.867549	231.495	0	0
9	2	door	5	F/n	D	old_9	1	resp_old	1	2.91329	237.565	3	0.633484	238.281	0	0
9	2	curtain	5	F/n	D	old_1	1	resp_old	1	2.49732	241.358	2	0.862033	242.305	0	0
9	2	chapter	5	F/n	D	new_unrel	1	resp_new	1	3.08871	245.973	2	1.40733	247.46	0	0
9	2	pane	5	F/n	D	new_rel	1	resp_new	1	5.66716	253.703	1	0.580936	254.367	1	1
9	2	mayor	5	F/n	D	new_unrel	1	resp_old	0	19.6666	274.608	1	3.8392	278.529	1	1
9	2	window	5	F/n	D	new_crit	1	resp_old	0	4.17919	283.292	3	0.756715	284.136	0	0
9	2	screen	5	F/n	D	new_rel	1	resp_new	1	3.07713	287.798	1	1.33052	289.219	0	0
9	2	breeze	5	F/n	D	old_5	1	resp_old	1	1.58978	291.39	3	0.744636	292.214	0	0
9	2	tarantula	6	f/n	WE	old_11	1	resp_old	1	2.68994	298.854	3	0.704089	299.637	0	0
9	2	organ	6	f/n	WE	new_unrel	1	resp_new	1	2.83062	303.047	2	1.08593	304.213	0	0
9	2	animal	6	f/n	WE	new_rel	1	resp_new	1	5.09905	309.896	1	1.40402	311.381	0	0
9	2	poison	6	f/n	WE	new_rel	1	resp_old	0	5.26339	317.223	1	1.81712	319.128	0	0
9	2	arachnid	6	f/n	WE	old_1	1	resp_old	1	3.24118	322.949	3	0.609923	323.643	0	0
9	2	small	6	f/n	WE	old_3	1	resp_new	0	4.82932	329.061	2	6.94619	336.086	1	1
9	2	spider	6	f/n	WE	new_crit	1	resp_new	1	8.43302	345.106	2	4.3722	349.564	1	1
9	2	bridge	6	f/n	WE	new_unrel	1	resp_old	0	2.20362	352.347	2	0.692182	353.118	0	0
9	3	sewage	1	F/N	T	old_1	0	resp_old	1	3.69876	6.20626	2	1.43627	7.72501	0	0
9	3	litter	1	F/N	T	old_2	0	resp_new	0	4.13414	12.4348	1	1.5009	14.0251	1	1
9	3	scholar	1	F/N	T	new_unrel	0	resp_new	1	2.77828	17.3857	2	0.662283	18.1378	0	0
9	3	dump	1	F/N	T	old_8	0	resp_old	1	1.61854	20.3354	3	0.704022	21.1189	0	0
9	3	pony	1	F/N	T	new_unrel	0	resp_new	1	1.98162	23.6807	3	0.586527	24.3546	0	0
9	3	trash	1	F/N	T	new_crit	0	resp_old	0	1.9169	26.855	2	2.01625	28.952	0	0
9	3	scraps	1	F/N	T	new_rel	0	resp_new	1	4.72292	34.2556	1	1.6589	36.0009	1	1
9	3	sweep	1	F/N	T	new_rel	0	resp_old	0	8.48362	45.0658	1	3.282	48.4247	1	1
9	3	bumpy	2	F/n	SM	old_8	1	resp_old	1	4.33734	60.1531	3	0.563496	60.8026	0	0
9	3	ready	2	F/n	SM	old_6	1	resp_new	0	3.6981	65.0787	1	0.68743	65.8493	0	0
9	3	uneven	2	F/n	SM	new_rel	1	resp_new	1	3.20625	69.6381	2	1.31266	71.0406	0	0
9	3	tough	2	F/n	SM	old_1	1	resp_new	0	3.66362	75.2893	2	0.692295	76.0706	0	0
9	3	agent	2	F/n	SM	new_unrel	1	resp_new	1	31.0543	107.703	2	1.09079	108.874	0	0
9	3	rough	2	F/n	SM	new_crit	1	resp_old	0	2.29194	111.744	3	0.516535	112.352	0	0
9	3	riders	2	F/n	SM	new_rel	1	resp_new	1	2.57266	115.507	2	0.662941	116.251	0	0
9	3	sparrow	2	F/n	SM	new_unrel	1	resp_new	1	2.9133	119.743	3	1.31936	121.145	0	0
9	3	symbol	3	f/N	FL	old_1	0	resp_new	0	10.0617	133.269	1	0.680268	134.033	2	1
9	3	national	3	f/N	FL	new_rel	0	resp_old	0	5.14645	139.755	1	0.656731	140.502	0	0
9	3	pendant	3	f/N	FL	new_rel	0	resp_new	1	6.75151	147.838	1	1.82422	149.745	0	0
9	3	stars	3	f/N	FL	old_10	0	resp_old	1	2.86646	153.199	3	0.674653	153.961	0	0
9	3	penalty	3	f/N	FL	new_unrel	0	resp_new	1	7.65275	162.195	2	1.57063	163.846	1	1
9	3	flag	3	f/N	FL	new_crit	0	resp_old	0	11.586	176.016	1	1.08997	177.192	0	0
9	3	beach	3	f/N	FL	new_unrel	0	resp_old	0	24.3219	202.093	2	1.03175	203.203	0	0
9	3	checkered	3	f/N	FL	old_4	0	resp_old	1	4.49835	208.282	3	0.984836	209.349	0	0
9	3	bench	4	F/N	CH	old_4	0	resp_old	1	2.76612	214.669	3	0.533507	215.29	0	0
9	3	poem	4	F/N	CH	new_unrel	0	resp_new	1	1.79986	217.669	3	0.674261	218.427	0	0
9	3	helmet	4	F/N	CH	new_unrel	0	resp_new	1	1.58305	220.591	2	0.568935	221.247	0	0
9	3	couch	4	F/N	CH	old_1	0	resp_old	1	1.44182	223.275	3	0.644945	224.005	0	0
9	3	recliner	4	F/N	CH	old_8	0	resp_old	1	2.07521	226.663	3	0.592549	227.335	0	0
9	3	stool	4	F/N	CH	new_rel	0	resp_new	1	3.05398	230.966	2	1.62503	232.676	0	0
9	3	wood	4	F/N	CH	new_rel	0	resp_new	1	2.63168	235.895	3	0.557376	236.531	0	0
9	3	chair	4	F/N	CH	new_crit	0	resp_new	1	2.60293	239.718	3	0.633356	240.431	0	0
9	3	drink	5	F/n	MU	old_4	1	resp_old	1	7.35638	250.522	1	9.13761	259.737	1	1
9	3	saucer	5	F/n	MU	new_rel	1	resp_new	1	6.74692	267.063	2	1.04507	268.196	0	0
9	3	bullet	5	F/n	MU	new_unrel	1	resp_new	1	3.3703	272.148	1	11.5841	283.815	1	1
9	3	tea	5	F/n	MU	old_1	1	resp_old	1	7.59533	291.983	2	0.721519	292.786	0	0
9	3	fabric	5	F/n	MU	new_unrel	1	resp_new	1	21.9884	315.352	2	1.30718	316.745	0	0
9	3	plastic	5	F/n	MU	new_rel	1	resp_new	1	6.40851	323.73	1	0.358163	324.171	2	1
9	3	cup	5	F/n	MU	new_crit	1	resp_new	1	4.42507	329.18	1	0.580613	329.844	0	0
9	3	straw	5	F/n	MU	old_7	1	resp_new	0	1.753	332.172	2	0.597924	332.858	0	0
9	3	dream	6	F/N	SLE	old_11	0	resp_old	1	3.56913	338.383	3	0.814848	339.282	0	0
9	3	yawn	6	F/N	SLE	old_3	0	resp_old	1	1.34847	341.214	3	0.53396	341.826	0	0
9	3	wake	6	F/N	SLE	new_rel	0	resp_new	1	4.58884	346.994	3	1.55337	348.639	0	0
9	3	peace	6	F/N	SLE	new_rel	0	resp_new	1	3.93239	353.158	1	1.0845	354.334	0	0
9	3	blanket	6	F/N	SLE	old_1	0	resp_old	1	1.6528	356.572	3	0.645633	357.305	0	0
9	3	shark	6	F/N	SLE	new_unrel	0	resp_new	1	2.6669	360.554	2	0.651367	361.292	0	0
9	3	rectangle	6	F/N	SLE	new_unrel	0	resp_new	1	1.93445	363.802	3	0.650536	364.544	0	0
9	3	sleep	6	F/N	SLE	new_crit	0	resp_new	1	4.82969	369.951	3	0.709272	370.739	0	0
9	4	sister	1	f/n	BO	old_11	1	resp_new	0	3.29991	5.94174	3	1.65281	7.67636	0	0
9	4	schools	1	f/n	BO	new_unrel	1	resp_new	1	2.47954	10.7433	2	0.855584	11.6877	0	0
9	4	female	1	f/n	BO	new_rel	1	resp_new	1	5.81977	18.0931	1	0.791476	18.972	0	0
9	4	episode	1	f/n	BO	new_unrel	1	resp_old	0	9.18986	28.7402	1	0.580229	29.4053	0	0
9	4	cute	1	f/n	BO	old_1	1	resp_old	1	1.54202	31.5229	3	0.516016	32.1235	0	0
9	4	beautiful	1	f/n	BO	new_rel	1	resp_new	1	1.91678	34.623	2	1.41252	36.1164	0	0
9	4	aunt	1	f/n	BO	old_3	1	resp_old	1	1.75315	38.4546	3	0.715325	39.2575	0	0
9	4	girl	1	f/n	BO	new_crit	1	resp_new	1	6.7364	46.577	1	3.54437	50.2055	2	1
9	4	tiger	2	f/n	TI	old_3	1	resp_old	1	5.60289	58.0144	3	0.668155	58.7586	0	0
9	4	number	2	f/n	TI	new_unrel	1	resp_new	1	2.09264	61.4388	3	0.45154	61.9808	0	0
9	4	roar	2	f/n	TI	new_rel	1	resp_new	1	3.75136	66.308	1	0.528044	66.923	0	0
9	4	cousin	2	f/n	TI	new_unrel	1	resp_new	1	2.97722	70.4851	3	0.644848	71.2205	0	0
9	4	jungle	2	f/n	TI	new_rel	1	resp_new	1	1.45425	73.257	1	0.463028	73.8069	0	0
9	4	pride	2	f/n	TI	old_10	1	resp_old	1	1.43642	75.8219	3	0.457177	76.3551	0	0
9	4	lion	2	f/n	TI	new_crit	1	resp_new	1	10.2962	87.2358	2	0.575184	87.8882	1	1
9	4	fierce	2	f/n	TI	old_1	1	resp_old	1	4.14383	92.6126	2	0.967263	93.6596	0	0
9	4	chilly	3	F/n	H	old_3	2	resp_old	1	1.78246	97.671	3	0.5803	98.3381	0	0
9	4	frigid	3	F/n	H	old_7	2	resp_old	1	1.82933	100.743	3	0.439877	101.265	0	0
9	4	freeze	3	F/n	H	old_1	2	resp_old	1	2.88914	104.728	1	0.322605	105.129	0	0
9	4	dandruff	3	F/n	H	new_unrel	2	resp_new	1	1.58832	107.294	3	0.446057	107.821	0	0
9	4	air	3	F/n	H	new_rel	2	resp_new	1	1.62417	110.026	1	0.422677	110.537	0	0
9	4	money	3	F/n	H	new_unrel	2	resp_new	1	3.48022	114.594	3	1.02058	115.701	0	0
9	4	frost	3	F/n	H	new_rel	2	resp_new	1	3.37625	119.655	1	0.363858	120.096	0	0
9	4	cold	3	F/n	H	new_crit	2	resp_new	1	7.59219	128.266	1	0.63926	128.989	2	1
9	4	pocket	4	f/N	SHI	old_5	0	resp_old	1	6.38812	139.404	1	0.715817	140.21	0	0
9	4	piano	4	f/N	SHI	new_unrel	0	resp_new	1	2.25086	143.043	3	0.673553	143.806	0	0
9	4	voltage	4	f/N	SHI	new_unrel	0	resp_new	1	1.70541	146.094	2	0.446255	146.618	0	0
9	4	polo	4	f/N	SHI	old_1	0	resp_old	1	2.29147	149.491	3	0.445346	150.013	0	0
9	4	iron	4	f/N	SHI	old_8	0	resp_new	0	4.50669	155.102	1	0.421963	155.612	0	0
9	4	shirt	4	f/N	SHI	new_crit	0	resp_new	1	6.0719	162.261	3	0.615866	162.969	0	0
9	4	linen	4	f/N	SHI	new_rel	0	resp_old	0	5.53251	169.085	1	3.52813	172.701	1	1
9	4	tie	4	f/N	SHI	new_rel	0	resp_new	1	12.4208	185.703	1	1.00835	186.79	1	1
9	4	sedan	5	f/n	TRU	old_8	1	resp_old	1	2.37389	192.208	3	0.422586	192.711	0	0
9	4	partner	5	f/n	TRU	new_unrel	1	resp_old	0	1.96331	195.251	1	1.00834	196.351	0	0
9	4	moisture	5	f/n	TRU	new_unrel	1	resp_new	1	1.9054	198.831	2	0.50412	199.414	0	0
9	4	drive	5	f/n	TRU	new_rel	1	resp_new	1	2.90759	202.901	2	0.990368	203.981	0	0
9	4	automobile	5	f/n	TRU	new_rel	1	resp_new	1	1.56501	206.125	1	0.381378	206.596	0	0
9	4	vehicle	5	f/n	TRU	old_1	1	resp_old	1	2.51463	209.686	2	1.51851	211.287	0	0
9	4	car	5	f/n	TRU	new_crit	1	resp_new	1	8.58263	220.448	1	1.81721	222.344	2	1
9	4	race	5	f/n	TRU	old_4	1	resp_old	1	3.24686	226.171	3	0.404692	226.653	0	0
9	4	light	6	F/N	SO	old_1	0	resp_old	1	2.0927	230.867	3	0.410592	231.368	0	0
9	4	plush	6	F/N	SO	old_5	0	resp_new	0	2.5506	234.492	3	0.422628	235.004	0	0
9	4	touch	6	F/N	SO	old_9	0	resp_old	1	4.99893	240.579	1	0.551127	241.211	0	0
9	4	canal	6	F/N	SO	new_unrel	0	resp_new	1	3.05342	244.841	2	1.08434	246.011	0	0
9	4	kitten	6	F/N	SO	new_rel	0	resp_new	1	3.63434	250.23	2	0.691502	251.012	0	0
9	4	fluffy	6	F/N	SO	new_rel	0	resp_old	0	5.50949	257.099	3	0.73262	257.916	0	0
9	4	soft	6	F/N	SO	new_crit	0	resp_old	0	2.26216	260.758	2	0.896758	261.733	0	0
9	4	rattlesnak	6	F/N	SO	new_unrel	0	resp_new	1	1.61293	263.933	3	0.463719	264.496	0	0
10	1	dump	1	F/n	GA	old_1	1	resp_old	1	6.2472	13.5199	3	12.3602	25.9679	0	0
10	1	debrise	1	F/n	GA	old_4	1	resp_old	1	4.82325	31.3721	2	1.3633	32.8224	0	0
10	1	sewage	1	F/n	GA	new_rel	1	resp_new	1	5.58539	38.9875	1	1.7	40.766	0	0
10	1	garbage	1	F/n	GA	old_12	1	resp_old	1	4.80608	46.1565	3	2.65015	48.8873	0	0
10	1	pony	1	F/n	GA	new_unrel	1	resp_new	1	4.71165	54.1752	2	2.14513	56.4013	0	0
10	1	trash	1	F/n	GA	new_crit	1	resp_old	0	2.50251	59.4788	2	1.92685	61.4937	0	0
10	1	scholar	1	F/n	GA	new_unrel	1	resp_new	1	3.42325	65.4982	2	1.32451	66.9085	0	0
10	1	rubbish	1	F/n	GA	new_rel	1	resp_old	0	2.34512	69.8367	3	2.66685	72.5842	0	0
10	1	curtain	2	F/N	WI	old_1	1	resp_old	1	3.55138	80.687	3	1.27429	82.0485	0	0
10	1	mayor	2	F/N	WI	new_unrel	1	resp_new	1	8.04114	90.664	2	1.82949	92.5774	0	0
10	1	open	2	F/N	WI	new_rel	1	resp_new	1	3.35271	96.5145	2	1.09706	97.6972	0	0
10	1	screen	2	F/N	WI	old_10	1	resp_old	1	1.93416	100.206	3	4.18875	104.475	0	0
10	1	chapter	2	F/N	WI	new_unrel	1	resp_new	1	5.16378	110.219	2	0.888672	111.195	0	0
10	1	sill	2	F/N	WI	new_rel	1	resp_old	0	2.4563	114.235	2	1.44815	115.77	0	0
10	1	glass	2	F/N	WI	old_6	1	resp_old	1	3.05916	119.407	2	1.74154	121.233	0	0
10	1	window	2	F/N	WI	new_crit	1	resp_old	0	9.05412	130.865	2	2.59164	133.54	0	0
10	1	drowsy	3	F/n	B	old_9	2	resp_old	1	1.9519	140.248	2	1.57024	141.904	0	0
10	1	rectangle	3	F/n	B	new_unrel	2	resp_new	1	4.19052	146.679	2	1.94186	148.705	0	0
10	1	doze	3	F/n	B	new_rel	2	resp_old	0	2.11561	151.399	2	3.44536	154.93	0	0
10	1	nap	3	F/n	B	old_1	2	resp_old	1	1.74083	157.253	3	0.39714	157.734	0	0
10	1	shark	3	F/n	B	new_unrel	2	resp_new	1	2.34507	160.66	3	3.00176	163.742	0	0
10	1	rest	3	F/n	B	old_6	2	resp_old	1	1.92837	166.248	2	0.705877	167.039	0	0
10	1	dream	3	F/n	B	new_rel	2	resp_old	0	4.34305	171.96	1	1.47135	173.516	0	0
10	1	sleep	3	F/n	B	new_crit	2	resp_old	0	1.58317	175.677	2	0.502936	176.269	0	0
10	1	Africa	4	f/N	L	old_6	0	resp_old	1	12.5675	191.795	2	1.93282	193.807	1	1
10	1	cousin	4	f/N	L	new_unrel	0	resp_new	1	2.40857	196.791	2	1.44944	198.317	0	0
10	1	number	4	f/N	L	new_unrel	0	resp_new	1	2.8569	201.749	3	1.42671	203.263	0	0
10	1	cage	4	f/N	L	new_rel	0	resp_old	0	3.04821	206.886	1	0.41698	207.387	0	0
10	1	pride	4	f/N	L	old_1	0	resp_old	1	15.4702	223.441	2	0.315437	223.842	1	1
10	1	lion	4	f/N	L	new_crit	0	resp_new	1	14.1386	238.56	3	1.87908	240.525	2	1
10	1	jungle	4	f/N	L	new_rel	0	resp_old	0	3.14713	244.254	1	0.768572	245.102	0	0
10	1	bears	4	f/N	L	old_11	0	resp_new	0	2.14525	247.821	2	0.480268	248.381	0	0
10	1	pole	5	f/n	BA	old_3	1	resp_old	1	6.4405	257.839	1	0.114212	258.036	0	0
10	1	banner	5	f/n	BA	old_10	1	resp_old	1	2.72582	261.343	2	0.142799	261.574	0	0
10	1	penalty	5	f/n	BA	new_unrel	1	resp_new	1	1.67686	263.826	1	0.794474	264.698	0	0
10	1	checkered	5	f/n	BA	new_rel	1	resp_new	1	4.97625	270.258	2	0.639466	270.984	0	0
10	1	stars	5	f/n	BA	new_rel	1	resp_old	0	2.69094	274.261	2	0.345387	274.694	0	0
10	1	wave	5	f/n	BA	old_1	1	resp_old	1	1.51801	276.797	2	0.653964	277.534	0	0
10	1	beach	5	f/n	BA	new_unrel	1	resp_new	1	4.09114	282.208	1	0.292872	282.578	0	0
10	1	flag	5	f/n	BA	new_crit	1	resp_old	0	7.99597	291.152	3	2.2817	293.516	2	1
10	1	sandals	6	f/N	FO	old_12	0	resp_new	0	2.84284	298.799	1	0.871775	299.748	0	0
10	1	soccer	6	f/N	FO	new_rel	0	resp_new	1	2.43278	302.758	1	0.744931	303.59	0	0
10	1	shoe	6	f/N	FO	new_rel	0	resp_old	0	3.7686	307.932	2	0.668101	308.682	0	0
10	1	inch	6	f/N	FO	old_4	0	resp_old	1	9.92936	319.192	3	0.363739	319.635	2	1
10	1	movie	6	f/N	FO	new_unrel	0	resp_new	1	3.37058	323.584	3	0.724191	324.388	0	0
10	1	south	6	f/N	FO	new_unrel	0	resp_new	1	1.68216	326.653	2	0.565322	327.302	0	0
10	1	foot	6	f/N	FO	new_crit	0	resp_new	1	6.43494	334.314	3	11.3629	345.754	3	1
10	1	hand	6	f/N	FO	old_1	0	resp_old	1	2.56718	348.898	2	0.149293	349.13	0	0
10	2	breathe	1	F/N	SME	old_1	0	resp_old	1	4.11474	6.80089	3	0.757708	7.64764	0	0
10	2	salts	1	F/N	SME	new_rel	0	resp_new	1	3.41108	11.6434	2	0.326891	12.0565	0	0
10	2	sniff	1	F/N	SME	old_10	0	resp_old	1	1.5182	14.1545	3	0.198993	14.4367	0	0
10	2	rose	1	F/N	SME	old_5	0	resp_old	1	1.72298	16.7379	3	0.192851	17.0094	0	0
10	2	servant	1	F/N	SME	new_unrel	0	resp_new	1	2.68476	20.2784	2	0.237859	20.5987	0	0
10	2	smell	1	F/N	SME	new_crit	0	resp_new	1	7.50963	28.683	3	2.09743	30.8659	2	1
10	2	barrel	1	F/N	SME	new_unrel	0	resp_new	1	3.28835	34.7298	2	0.450898	35.2601	0	0
10	2	nose	1	F/N	SME	new_rel	0	resp_old	0	4.31974	40.1652	3	0.264419	40.5138	0	0
10	2	funeral	2	f/N	BLA	old_9	0	resp_old	1	5.41503	48.726	1	0.632799	49.4428	0	0
10	2	thermomete	2	f/N	BLA	new_unrel	0	resp_new	1	3.17055	53.1935	3	0.272129	53.545	0	0
10	2	brown	2	f/N	BLA	new_rel	0	resp_old	0	2.66701	56.7877	2	0.466299	57.3424	0	0
10	2	cat	2	f/N	BLA	old_6	0	resp_old	1	3.54591	61.4701	3	1.04132	62.5923	0	0
10	2	blue	2	f/N	BLA	old_1	0	resp_old	1	1.31897	64.4949	3	0.842625	65.4198	0	0
10	2	ink	2	f/N	BLA	new_rel	0	resp_old	0	2.22198	68.224	1	0.547078	68.8578	0	0
10	2	cauliflowe	2	f/N	BLA	new_unrel	0	resp_new	1	2.03427	71.4755	3	0.199853	71.7606	0	0
10	2	black	2	f/N	BLA	new_crit	0	resp_new	1	6.04658	78.3837	3	1.82494	80.297	2	1
10	2	ashes	3	F/n	CI	old_5	0	resp_old	1	3.00103	85.4414	2	0.401257	85.9267	0	0
10	2	blaze	3	F/n	CI	new_rel	0	resp_old	0	5.84288	92.3457	2	0.476569	92.9024	0	0
10	2	pipe	3	F/n	CI	old_1	0	resp_old	1	1.94652	95.4321	3	1.63928	97.1502	0	0
10	2	lungs	3	F/n	CI	old_12	0	resp_old	1	1.39544	99.1201	3	0.379569	99.588	0	0
10	2	billows	3	F/n	CI	new_rel	0	resp_old	0	2.32075	102.483	1	0.130643	102.695	0	0
10	2	smoke	3	F/n	CI	new_crit	0	resp_old	0	2.69012	105.961	2	0.19923	106.237	0	0
10	2	mathematic	3	F/n	CI	new_unrel	0	resp_new	1	1.50646	108.322	3	0.288863	108.694	0	0
10	2	jewel	3	F/n	CI	new_unrel	0	resp_new	1	1.21957	110.496	3	0.326577	110.91	0	0
10	2	air	4	F/N	CO	old_1	0	resp_old	1	2.57344	118.526	2	0.265738	118.88	0	0
10	2	wet	4	F/N	CO	old_9	0	resp_old	1	1.45343	120.915	3	0.219512	121.212	0	0
10	2	chilly	4	F/N	CO	old_4	0	resp_old	1	2.28644	124.08	3	0.709722	124.87	0	0
10	2	money	4	F/N	CO	new_unrel	0	resp_new	1	2.06344	127.519	3	0.34827	127.947	0	0
10	2	frigid	4	F/N	CO	new_rel	0	resp_old	0	4.4429	132.972	1	0.133064	133.184	0	0
10	2	winter	4	F/N	CO	new_rel	0	resp_old	0	1.78822	135.557	3	0.316358	135.958	0	0
10	2	dandruff	4	F/N	CO	new_unrel	0	resp_new	1	1.73531	138.271	3	0.186545	138.536	0	0
10	2	cold	4	F/N	CO	new_crit	0	resp_new	1	9.13065	148.246	3	0.494649	148.818	2	1
10	2	cuffs	5	f/N	SHI	old_4	0	resp_new	0	3.82683	154.752	2	0.187877	155.023	0	0
10	2	shorts	5	f/N	SHI	new_rel	0	resp_old	0	3.95643	159.557	2	0.434131	160.073	0	0
10	2	piano	5	f/N	SHI	new_unrel	0	resp_new	1	1.19033	161.842	3	0.220354	162.144	0	0
10	2	belt	5	f/N	SHI	old_1	0	resp_old	1	1.4249	164.149	3	0.264296	164.496	0	0
10	2	voltage	5	f/N	SHI	new_unrel	0	resp_new	1	1.17851	166.258	3	0.181221	166.521	0	0
10	2	shirt	5	f/N	SHI	new_crit	0	resp_new	1	8.14178	175.247	3	0.951963	176.288	2	1
10	2	vest	5	f/N	SHI	new_rel	0	resp_old	0	1.61203	178.479	1	0.319643	178.882	0	0
10	2	linen	5	f/N	SHI	old_11	0	resp_old	1	2.23866	181.696	3	0.24998	182.027	0	0
10	2	ready	6	F/N	ROU	old_1	0	resp_old	1	2.35608	186.382	3	0.371764	186.835	0	0
10	2	agent	6	F/N	ROU	new_unrel	0	resp_new	1	3.17638	190.594	2	0.244667	190.924	0	0
10	2	ground	6	F/N	ROU	old_5	0	resp_old	1	1.35433	192.858	3	0.264394	193.204	0	0
10	2	smooth	6	F/N	ROU	old_7	0	resp_old	1	3.34106	197.129	1	0.140311	197.355	0	0
10	2	sparrow	6	F/N	ROU	new_unrel	0	resp_new	1	1.40664	199.34	3	0.231569	199.66	0	0
10	2	rough	6	F/N	ROU	new_crit	0	resp_new	1	7.94643	208.187	3	0.326853	208.598	2	1
10	2	sand	6	F/N	ROU	new_rel	0	resp_old	0	1.48299	210.661	3	0.256733	211.001	0	0
10	2	uneven	6	F/N	ROU	new_rel	0	resp_old	0	2.86069	214.441	1	0.444238	214.968	0	0
10	3	pie	1	F/N	SW	old_8	0	resp_old	1	3.51101	5.96743	1	0.886427	6.93432	0	0
10	3	alligator	1	F/N	SW	new_unrel	0	resp_new	1	1.62973	9.14952	3	0.274802	9.51379	0	0
10	3	taste	1	F/N	SW	old_1	0	resp_old	1	1.4888	11.5874	2	0.450056	12.1148	0	0
10	3	tooth	1	F/N	SW	new_rel	0	resp_old	0	2.24552	14.9347	2	1.16108	16.1818	0	0
10	3	city	1	F/N	SW	new_unrel	0	resp_new	1	1.15498	17.9184	3	0.265255	18.2651	0	0
10	3	sour	1	F/N	SW	old_4	0	resp_old	1	1.95788	20.8055	3	0.238136	21.1229	0	0
10	3	candy	1	F/N	SW	new_rel	0	resp_old	0	1.86369	23.5735	2	1.378	25.0307	0	0
10	3	sweet	1	F/N	SW	new_crit	0	resp_new	1	5.72798	31.3354	2	1.73033	33.154	1	1
10	3	small	2	f/n	WE	old_1	1	resp_old	1	1.88127	38.2506	1	0.388364	38.7242	0	0
10	3	bridge	2	f/n	WE	new_unrel	1	resp_new	1	1.16041	40.4618	3	1.69174	42.2413	0	0
10	3	fright	2	f/n	WE	new_rel	1	resp_new	1	3.79186	46.614	1	0.265429	46.9617	0	0
10	3	fly	2	f/n	WE	new_rel	1	resp_old	0	1.43651	48.9806	1	0.248547	49.3117	0	0
10	3	ugly	2	f/n	WE	old_7	1	resp_old	1	1.2957	51.1831	2	0.503966	51.7691	0	0
10	3	organ	2	f/n	WE	new_unrel	1	resp_new	1	2.57936	54.9278	1	0.81271	55.8223	0	0
10	3	tarantula	2	f/n	WE	old_5	1	resp_old	1	1.42457	57.8237	3	0.24352	58.1499	0	0
10	3	spider	2	f/n	WE	new_crit	1	resp_old	0	2.74301	61.4737	2	0.271433	61.8282	0	0
10	3	truck	3	f/n	TRU	old_3	1	resp_old	1	6.2534	71.8844	3	0.517948	72.484	0	0
10	3	bus	3	f/n	TRU	old_1	1	resp_old	1	1.26006	74.3213	2	0.279014	74.6826	0	0
10	3	partner	3	f/n	TRU	new_unrel	1	resp_new	1	1.82901	77.0922	1	0.701742	77.8725	0	0
10	3	moisture	3	f/n	TRU	new_unrel	1	resp_new	1	1.65887	80.1132	2	0.538215	80.7353	0	0
10	3	jeep	3	f/n	TRU	new_rel	1	resp_old	0	2.90189	84.2176	1	0.548697	84.8435	0	0
10	3	car	3	f/n	TRU	new_crit	1	resp_old	0	1.89889	87.3242	3	0.379655	87.7832	0	0
10	3	garage	3	f/n	TRU	new_rel	1	resp_old	0	4.05545	92.4246	2	0.507174	93.0096	0	0
10	3	automobile	3	f/n	TRU	old_7	1	resp_old	1	1.69986	95.2854	3	0.228252	95.6037	0	0
10	3	orange	4	f/n	A	old_10	1	resp_old	1	3.20004	100.542	2	0.513425	101.141	0	0
10	3	journal	4	f/n	A	new_unrel	1	resp_new	1	1.22527	102.948	2	0.36452	103.394	0	0
10	3	juice	4	f/n	A	old_1	1	resp_old	1	1.74711	105.719	3	0.266649	106.063	0	0
10	3	bowl	4	f/n	A	old_3	1	resp_old	1	1.67611	108.321	2	0.281891	108.681	0	0
10	3	banana	4	f/n	A	new_rel	1	resp_old	0	1.01437	110.273	2	0.470086	110.824	0	0
10	3	cocktail	4	f/n	A	new_rel	1	resp_new	1	2.06316	113.465	1	0.654482	114.199	0	0
10	3	fruit	4	f/n	A	new_crit	1	resp_old	0	1.56491	116.346	2	0.325566	116.755	0	0
10	3	player	4	f/n	A	new_unrel	1	resp_new	1	1.13695	118.473	3	0.447795	119.009	0	0
10	3	swivel	5	F/N	CH	old_10	0	resp_old	1	2.88949	124.559	3	0.183832	124.821	0	0
10	3	couch	5	F/N	CH	new_rel	0	resp_old	0	2.02238	127.425	2	0.114758	127.625	0	0
10	3	rocking	5	F/N	CH	old_1	0	resp_old	1	1.38325	129.588	3	0.236539	129.913	0	0
10	3	poem	5	F/N	CH	new_unrel	0	resp_new	1	1.25445	131.744	2	0.573245	132.405	0	0
10	3	helmet	5	F/N	CH	new_unrel	0	resp_new	1	2.62584	135.612	3	1.3005	136.995	0	0
10	3	sitting	5	F/N	CH	new_rel	0	resp_old	0	1.54766	139.126	2	0.343711	139.559	0	0
10	3	seat	5	F/N	CH	old_6	0	resp_old	1	0.961363	141.096	3	0.392224	141.574	0	0
10	3	chair	5	F/N	CH	new_crit	0	resp_new	1	9.87133	152.03	2	0.891987	153.001	1	1
10	3	monarch	6	f/N	K	old_12	0	resp_old	1	2.44389	159.404	3	0.359485	159.852	0	0
10	3	oven	6	f/N	K	new_unrel	0	resp_new	1	1.40707	161.841	2	0.276902	162.195	0	0
10	3	England	6	f/N	K	old_1	0	resp_old	1	1.30142	164.079	3	0.23224	164.399	0	0
10	3	rule	6	f/N	K	new_rel	0	resp_old	0	1.40739	166.387	2	0.192237	166.655	0	0
10	3	crown	6	f/N	K	new_rel	0	resp_old	0	0.9554	168.196	2	0.213106	168.49	0	0
10	3	yellow	6	f/N	K	new_unrel	0	resp_new	1	1.66478	170.73	3	0.53146	171.34	0	0
10	3	king	6	f/N	K	new_crit	0	resp_new	1	6.38855	178.304	3	0.326227	178.706	0	0
10	3	dictator	6	f/N	K	old_4	0	resp_new	0	1.8936	181.18	2	0.186818	181.451	0	0
10	4	butter	1	f/n	BU	old_1	1	resp_old	1	4.9406	8.72796	3	0.177267	8.99266	0	0
10	4	sandwich	1	f/n	BU	old_11	1	resp_old	1	1.41874	10.988	3	0.169395	11.2449	0	0
10	4	wine	1	f/n	BU	old_3	1	resp_old	1	2.23362	14.0627	2	0.167035	14.3159	0	0
10	4	flour	1	f/n	BU	new_rel	1	resp_old	0	2.63739	17.5281	1	0.202441	17.8132	0	0
10	4	eat	1	f/n	BU	new_rel	1	resp_new	1	1.6122	20.0001	2	0.15676	20.2404	0	0
10	4	bread	1	f/n	BU	new_crit	1	resp_old	0	3.45755	24.283	2	0.370236	24.74	0	0
10	4	judge	1	f/n	BU	new_unrel	1	resp_new	1	1.13745	26.4611	3	0.169645	26.7179	0	0
10	4	model	1	f/n	BU	new_unrel	1	resp_new	1	1.08428	28.3861	3	0.255437	28.7231	0	0
10	4	lid	2	F/n	MU	old_4	1	resp_old	1	2.38014	33.0851	3	0.169087	33.3351	0	0
10	4	plastic	2	F/n	MU	new_rel	1	resp_new	1	1.94618	35.8658	1	0.137595	36.0825	0	0
10	4	goblet	2	F/n	MU	old_1	1	resp_old	1	1.28974	37.953	3	0.421154	38.4621	0	0
10	4	bullet	2	F/n	MU	new_unrel	1	resp_new	1	3.51047	42.5523	3	0.187528	42.8208	0	0
10	4	fabric	2	F/n	MU	new_unrel	1	resp_new	1	2.08664	45.4854	2	0.149461	45.7148	0	0
10	4	mug	2	F/n	MU	old_8	1	resp_old	1	2.87796	49.1734	3	1.20766	50.4587	0	0
10	4	coaster	2	F/n	MU	new_rel	1	resp_new	1	2.35091	53.3918	1	0.108698	53.5871	0	0
10	4	cup	2	F/n	MU	new_crit	1	resp_old	0	1.68277	55.8443	2	0.154917	56.0826	0	0
10	4	fluffy	3	F/n	HA	old_1	1	resp_old	1	1.46541	59.3478	3	0.16503	59.59	0	0
10	4	hard	3	F/n	HA	old_12	1	resp_old	1	3.28219	63.449	1	1.54356	65.0781	0	0
10	4	light	3	F/n	HA	new_rel	1	resp_old	0	1.47708	67.1311	1	1.07619	68.2846	0	0
10	4	canal	3	F/n	HA	new_unrel	1	resp_new	1	2.04055	70.9093	1	0.277219	71.2655	0	0
10	4	fur	3	F/n	HA	old_4	1	resp_old	1	2.08116	73.929	3	0.199619	74.2142	0	0
10	4	rattlesnak	3	F/n	HA	new_unrel	1	resp_new	1	1.84086	76.6326	3	0.133312	76.8562	0	0
10	4	furry	3	F/n	HA	new_rel	1	resp_old	0	4.31918	81.7486	1	0.25407	82.0874	0	0
10	4	soft	3	F/n	HA	new_crit	1	resp_old	0	1.64106	84.3105	3	0.213868	84.6025	0	0
10	4	military	4	f/n	NA	old_6	1	resp_old	1	1.47756	87.7973	3	0.319669	88.2055	0	0
10	4	freckle	4	f/n	NA	new_unrel	1	resp_new	1	1.34794	90.1287	2	0.336085	90.5418	0	0
10	4	combat	4	f/n	NA	new_rel	1	resp_old	0	2.46217	93.5862	1	0.136459	93.804	0	0
10	4	march	4	f/n	NA	new_rel	1	resp_old	0	1.91664	96.3025	2	0.121845	96.5095	0	0
10	4	war	4	f/n	NA	old_1	1	resp_old	1	1.40688	98.501	3	0.242545	98.8204	0	0
10	4	draft	4	f/n	NA	old_9	1	resp_old	1	1.51237	100.914	3	0.263523	101.255	0	0
10	4	army	4	f/n	NA	new_crit	1	resp_old	0	2.39178	104.231	2	0.357466	104.67	0	0
10	4	crystal	4	f/n	NA	new_unrel	1	resp_new	1	1.14926	106.404	3	0.192023	106.683	0	0
10	4	pretty	5	f/N	G	old_4	0	resp_old	1	1.9815	110.593	3	0.118047	110.79	0	0
10	4	young	5	f/N	G	new_rel	0	resp_new	1	1.51839	112.885	1	0.240978	113.208	0	0
10	4	schools	5	f/N	G	new_unrel	0	resp_new	1	2.97785	116.769	2	0.324507	117.178	0	0
10	4	aunt	5	f/N	G	new_rel	0	resp_new	1	1.89963	119.659	3	0.229976	119.968	0	0
10	4	hair	5	f/N	G	old_1	0	resp_new	0	3.35293	123.904	1	0.117355	124.106	0	0
10	4	episode	5	f/N	G	new_unrel	0	resp_new	1	2.49153	127.175	3	0.189082	127.452	0	0
10	4	date	5	f/N	G	old_8	0	resp_new	0	1.40061	129.429	1	0.157126	129.669	0	0
10	4	girl	5	f/N	G	new_crit	0	resp_new	1	8.01042	138.252	3	0.823215	139.155	2	1
10	4	wrath	6	F/n	M	old_9	2	resp_old	1	1.69995	149.157	3	0.52827	149.764	0	0
10	4	calm	6	F/n	M	old_5	2	resp_old	1	1.30745	151.65	1	0.793054	152.525	0	0
10	4	happy	6	F/n	M	old_1	2	resp_new	0	3.1767	156.286	1	0.233282	156.604	0	0
10	4	enrage	6	F/n	M	new_rel	2	resp_old	0	2.49065	159.674	1	0.173568	159.936	0	0
10	4	earthworm	6	F/n	M	new_unrel	2	resp_new	1	1.37732	161.893	3	0.188654	162.165	0	0
10	4	ire	6	F/n	M	new_rel	2	resp_new	1	1.70001	164.442	3	0.152394	164.672	0	0
10	4	anger	6	F/n	M	new_crit	2	resp_old	0	1.36602	166.616	1	0.291681	166.99	0	0
10	4	dinner	6	F/n	M	new_unrel	2	resp_new	1	1.10812	168.678	2	0.244307	169.003	0	0
11	1	boards	1	F/N	ROU	old_1	1	resp_old	1	7.79732	12.1819	2	3.97372	16.2462	0	0
11	1	sparrow	1	F/N	ROU	new_unrel	1	resp_new	1	3.512	20.3417	1	5.11657	25.5442	0	0
11	1	jagged	1	F/N	ROU	new_rel	1	resp_old	0	3.58684	29.7179	1	1.1611	30.97	0	0
11	1	tough	1	F/N	ROU	old_9	1	resp_old	1	2.58529	34.1399	3	0.951271	35.171	0	0
11	1	agent	1	F/N	ROU	new_unrel	1	resp_old	0	4.12576	39.8779	1	0.411967	40.3751	0	0
11	1	rough	1	F/N	ROU	new_crit	1	resp_old	0	1.42433	42.3735	2	12.268	54.723	1	1
11	1	gravel	1	F/N	ROU	old_4	1	resp_old	1	5.83773	61.1387	3	0.763046	61.9806	0	0
11	1	bumpy	1	F/N	ROU	new_rel	1	resp_new	1	1.735	64.2985	2	2.88352	67.2726	0	0
11	1	cake	2	F/n	HON	old_12	1	resp_old	1	2.60802	73.0736	3	13.3804	86.5379	1	1
11	1	alligator	2	F/n	HON	new_unrel	1	resp_new	1	3.55755	90.6802	3	3.40853	94.1691	0	0
11	1	honey	2	F/n	HON	old_1	1	resp_old	1	2.69725	97.4422	3	0.931866	98.4619	0	0
11	1	chocolate	2	F/n	HON	old_6	1	resp_old	1	1.82922	100.878	3	0.949538	101.918	0	0
11	1	good	2	F/n	HON	new_rel	1	resp_old	0	3.13561	105.636	2	0.319975	106.045	0	0
11	1	sweet	2	F/n	HON	new_crit	1	resp_new	1	6.60167	113.233	3	1.69962	115.021	3	1
11	1	city	2	F/n	HON	new_unrel	1	resp_new	1	3.17654	118.776	2	1.14923	120.014	0	0
11	1	sour	2	F/n	HON	new_rel	1	resp_new	1	2.186	122.783	1	1.37202	124.234	0	0
11	1	stink	3	F/N	SM	old_9	0	resp_new	0	4.96406	133.37	1	0.856121	134.312	0	0
11	1	fire	3	F/N	SM	old_1	0	resp_old	1	2.56113	137.456	3	0.79128	138.338	0	0
11	1	lungs	3	F/N	SM	new_rel	0	resp_new	1	7.94181	146.861	3	1.10842	148.05	0	0
11	1	cigarette	3	F/N	SM	old_3	0	resp_old	1	1.74654	150.381	2	0.703291	151.163	0	0
11	1	chimney	3	F/N	SM	new_rel	0	resp_new	1	1.92279	153.662	2	4.51202	158.264	2	1
11	1	mathematic	3	F/N	SM	new_unrel	0	resp_new	1	3.13012	161.972	2	1.79979	163.853	0	0
11	1	smoke	3	F/N	SM	new_crit	0	resp_new	1	6.70494	171.143	3	6.9371	178.158	1	1
11	1	jewel	3	F/N	SM	new_unrel	0	resp_new	1	3.52865	182.265	2	0.863795	183.212	0	0
11	1	iron	4	f/N	SHI	old_4	0	resp_new	0	3.35888	191.957	2	0.909254	192.945	0	0
11	1	vest	4	f/N	SHI	new_rel	0	resp_new	1	3.23027	196.759	2	0.832944	197.679	0	0
11	1	voltage	4	f/N	SHI	new_unrel	0	resp_new	1	2.5441	200.803	3	0.839914	201.724	0	0
11	1	piano	4	f/N	SHI	new_unrel	0	resp_new	1	1.91657	204.226	1	0.815654	205.124	0	0
11	1	sleeves	4	f/N	SHI	old_7	0	resp_old	1	2.74878	208.457	2	0.920314	209.467	0	0
11	1	shirt	4	f/N	SHI	new_crit	0	resp_new	1	1.90525	211.957	3	3.09508	215.133	1	1
11	1	collar	4	f/N	SHI	new_rel	0	resp_new	1	7.63685	223.366	1	1.02594	224.47	0	0
11	1	pants	4	f/N	SHI	old_1	0	resp_old	1	1.54286	226.6	3	1.03937	227.722	0	0
11	1	roar	5	f/N	L	old_7	0	resp_old	1	3.26479	233.732	2	0.843966	234.656	0	0
11	1	cousin	5	f/N	L	new_unrel	0	resp_new	1	1.14308	236.381	2	1.30702	237.771	0	0
11	1	mane	5	f/N	L	old_4	0	resp_old	1	1.09677	239.453	3	0.686239	240.228	0	0
11	1	number	5	f/N	L	new_unrel	0	resp_new	1	2.70809	243.516	2	0.674141	244.267	0	0
11	1	hunt	5	f/N	L	new_rel	0	resp_new	1	2.63794	247.483	3	1.04367	248.608	0	0
11	1	lion	5	f/N	L	new_crit	0	resp_new	1	2.65492	251.845	3	2.25266	254.174	1	1
11	1	bears	5	f/N	L	new_rel	0	resp_new	1	3.71023	258.47	2	0.410293	258.968	0	0
11	1	feline	5	f/N	L	old_1	0	resp_old	1	1.48906	261.033	3	0.405945	261.522	0	0
11	1	reign	6	f/n	QU	old_1	1	resp_old	1	2.54984	266.424	3	0.304896	266.818	0	0
11	1	crown	6	f/n	QU	old_10	1	resp_old	1	1.12031	268.513	2	0.534173	269.126	0	0
11	1	subjects	6	f/n	QU	old_5	1	resp_old	1	1.01476	270.726	3	3.39335	274.197	0	0
11	1	yellow	6	f/n	QU	new_unrel	1	resp_new	1	2.14549	276.92	3	0.943696	277.944	0	0
11	1	England	6	f/n	QU	new_rel	1	resp_new	1	1.50702	280.026	3	1.14899	281.254	0	0
11	1	oven	6	f/n	QU	new_unrel	1	resp_new	1	1.54794	283.386	3	0.265975	283.729	0	0
11	1	king	6	f/n	QU	new_crit	1	resp_new	1	3.03655	287.339	2	0.693821	288.115	0	0
11	1	prince	6	f/n	QU	new_rel	1	resp_new	1	3.3118	292.012	2	2.96434	295.063	0	0
11	2	weather	1	F/n	H	old_11	2	resp_old	1	5.35669	8.77424	3	1.08894	9.94336	0	0
11	2	money	1	F/n	H	new_unrel	2	resp_old	0	4.00907	14.5292	2	0.666225	15.2773	0	0
11	2	dandruff	1	F/n	H	new_unrel	2	resp_new	1	1.69436	17.5581	3	1.09507	18.7311	0	0
11	2	warm	1	F/n	H	new_rel	2	resp_old	0	5.80788	25.1229	3	1.35564	26.5607	0	0
11	2	frost	1	F/n	H	new_rel	2	resp_old	0	2.32731	29.4646	2	0.463286	30.0125	0	0
11	2	cold	1	F/n	H	new_crit	2	resp_old	0	1.22504	31.8136	1	0.457308	32.3518	0	0
11	2	ice	1	F/n	H	old_1	2	resp_old	1	0.926038	33.86	3	0.656503	34.6032	0	0
11	2	air	1	F/n	H	old_6	2	resp_new	0	3.45805	38.644	1	3.86132	42.592	1	1
11	2	grief	2	f/n	W	old_7	1	resp_new	0	3.47534	48.2425	1	1.36583	49.6909	0	0
11	2	cat	2	f/n	W	new_rel	1	resp_new	1	1.09642	51.3671	3	0.47587	51.9192	0	0
11	2	color	2	f/n	W	new_rel	1	resp_new	1	1.20741	53.7034	2	1.16597	54.9546	0	0
11	2	cauliflowe	2	f/n	W	new_unrel	1	resp_new	1	1.79389	57.3282	3	1.23953	58.6535	0	0
11	2	death	2	f/n	W	old_1	1	resp_old	1	3.45277	62.6924	3	1.15525	63.9262	0	0
11	2	black	2	f/n	W	new_crit	1	resp_old	0	0.879872	65.3823	3	0.505451	65.9674	0	0
11	2	funeral	2	f/n	W	old_4	1	resp_old	1	0.984991	67.5263	3	0.725701	68.333	0	0
11	2	thermomete	2	f/n	W	new_unrel	1	resp_new	1	1.10177	70.015	3	1.04291	71.1422	0	0
11	2	jelly	3	f/N	BR	old_1	0	resp_old	1	1.74733	74.9115	2	1.34475	76.3345	0	0
11	2	judge	3	f/N	BR	new_unrel	0	resp_new	1	1.50116	78.4232	3	1.21119	79.7189	0	0
11	2	jam	3	f/N	BR	new_rel	0	resp_new	1	1.10851	81.4019	2	3.36747	84.8469	2	1
11	2	milk	3	f/N	BR	new_rel	0	resp_new	1	6.12454	91.5483	2	0.792819	92.4264	0	0
11	2	model	3	f/N	BR	new_unrel	0	resp_new	1	4.46618	97.4723	2	0.493465	98.0436	0	0
11	2	crust	3	f/N	BR	old_9	0	resp_new	0	2.37953	101.009	1	0.169146	101.264	0	0
11	2	flour	3	f/N	BR	old_4	0	resp_old	1	4.26176	106.103	3	0.839587	107.025	0	0
11	2	bread	3	f/N	BR	new_crit	0	resp_new	1	1.76481	109.376	3	9.16715	118.63	0	0
11	2	pilot	4	f/N	AR	old_2	0	resp_old	1	1.0904	121.974	3	0.54776	122.604	0	0
11	2	crystal	4	f/N	AR	new_unrel	0	resp_new	1	0.896839	124.086	2	0.537764	124.713	0	0
11	2	march	4	f/N	AR	new_rel	0	resp_new	1	1.33091	126.625	3	0.336431	127.043	0	0
11	2	combat	4	f/N	AR	old_1	0	resp_old	1	1.1314	128.758	2	0.509394	129.348	0	0
11	2	soldier	4	f/N	AR	new_rel	0	resp_old	0	0.979517	130.911	3	0.25626	131.254	0	0
11	2	army	4	f/N	AR	new_crit	0	resp_new	1	3.44683	135.284	3	0.598219	135.967	0	0
11	2	freckle	4	f/N	AR	new_unrel	0	resp_new	1	1.06736	137.609	2	0.405923	138.093	0	0
[truncated: 3,761 more rows]
